# Supplementary material for: Can We Still Trust Docking Results? An Extension of the Applicability of DockBench on PDBbind Database
Source: MDPI journal article supplement (doi:10.3390/ijms20143558), 2019-07-20
Supplement: s1 [file s1]

# Can we still trust docking results? An extension of the applicability of DockBench on PDBbind database.

Giovanni Bolcato <sup>1</sup>, Alberto Cuzzolin <sup>1</sup>, Maicol Bissaro <sup>1</sup>, Stefano Moro<sup>1,\*</sup> and Mattia Sturlese <sup>1,\*</sup>

<sup>1</sup> Molecular Modeling Section, Department of Pharmaceutical and Pharmacological Sciences, University of Padova, 35131 Padova, Italy.

\* Correspondence: stefano.moro@unipd.it; mattia.sturlese@unipd.it

## Supplementary Materials

### Table of content

|                  |                                                                                                                                               |        |
|------------------|-----------------------------------------------------------------------------------------------------------------------------------------------|--------|
| <b>Figure S1</b> | Docking runs having as first pose the lowest RMSD conformation: Heatmaps of most populated protein families (first part)                      | Page 2 |
| <b>Figure S2</b> | Docking runs having as first pose the lowest RMSD conformation: Heatmaps of most populated protein families (second part)                     | Page 3 |
| <b>Figure S3</b> | Plots reporting the RMSD of the first pose: Heatmaps of most populated protein families (first part)                                          | Page 4 |
| <b>Figure S4</b> | Plots reporting the RMSD of the first pose: Heatmaps of most populated protein families (second part)                                         | Page 5 |
| <b>Figure S5</b> | Docking runs having the first pose characterized by an RMSD value lower than 1.5 Å: Heatmaps of most populated protein families (first part)  | Page 6 |
| <b>Figure S6</b> | Docking runs having the first pose characterized by an RMSD value lower than 1.5 Å: Heatmaps of most populated protein families (second part) | Page 7 |
| <b>Table S1</b>  | Percentage of runs with native-like conformation reported as the first pose                                                                   | Page 8 |

Figure S1

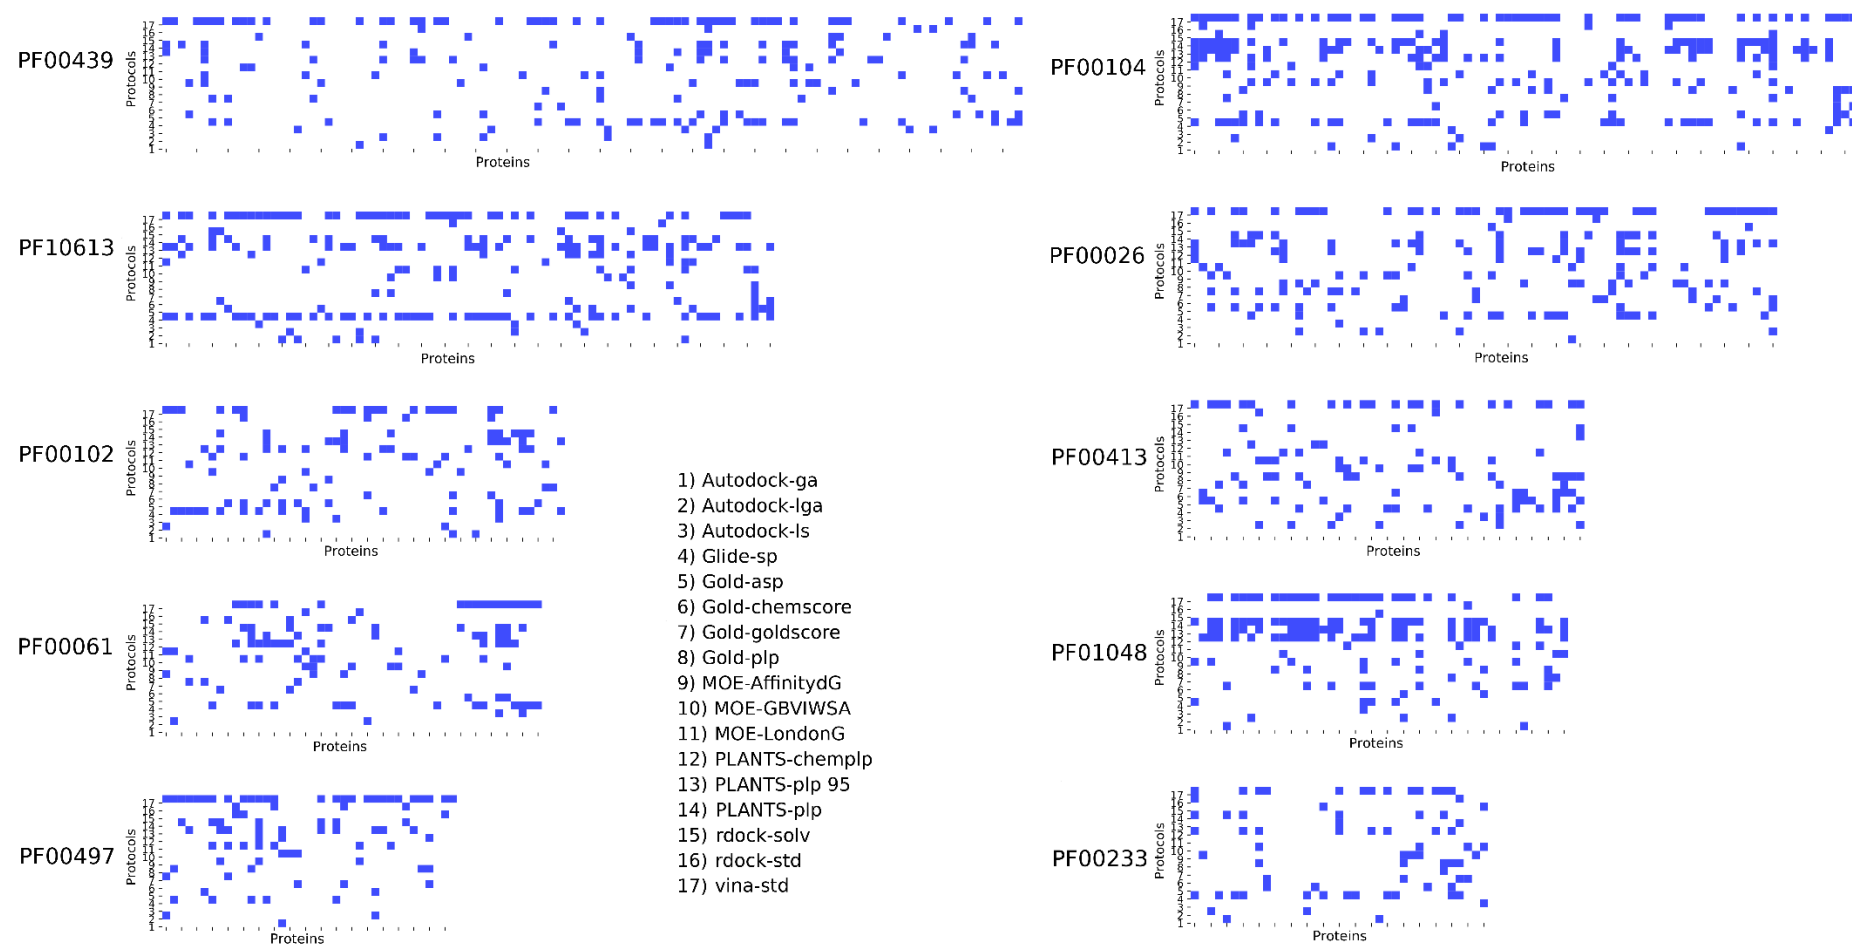

**Figure S1.** DockBench Results divided by Pfam protein families. The heatmaps show in blue the cases in which the docking run reported at best solution the conformation with the lowest RMSD among the 20 generated. The ten families are: PF00439, Bromodomain; PF10613, Ligated ion channel L-glutamate and glycine-binding site; PF00102, Protein tyrosine phosphatases; PF000061 Lipocalin; PF00497, Bacterial extracellular solute-binding proteins family 3; PF00104, Hormone receptors; PF00026, Eukaryotic aspartyl protease Peptidase M\_10; PF01048, Phosphorylase superfamily; PF00233, 3'5'-cyclic nucleotide phosphodiesterases.

PF00089  
PF14670  
PF09396

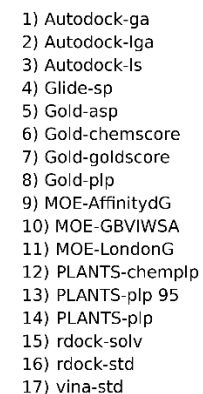

**Figure S2.** DockBench Results divided by Pfam protein families. The heatmaps show in blue the cases in which the docking run reported at best solution the conformation with the lowest RMSD among the 20 generated (continued from figure S1). The six families are PF00089 Trypsin, PF14670 Coagulation Factor Xa inhibitory site, PF09396 Thrombin light chain, PF00077 Retroviral aspartyl proteases, PF00194 carbonic anhydrases, PF00069 protein kinase, PF07714 tyrosine kinase, PF02518 GHKL domain, PF00183 HSP90.

Figure S3

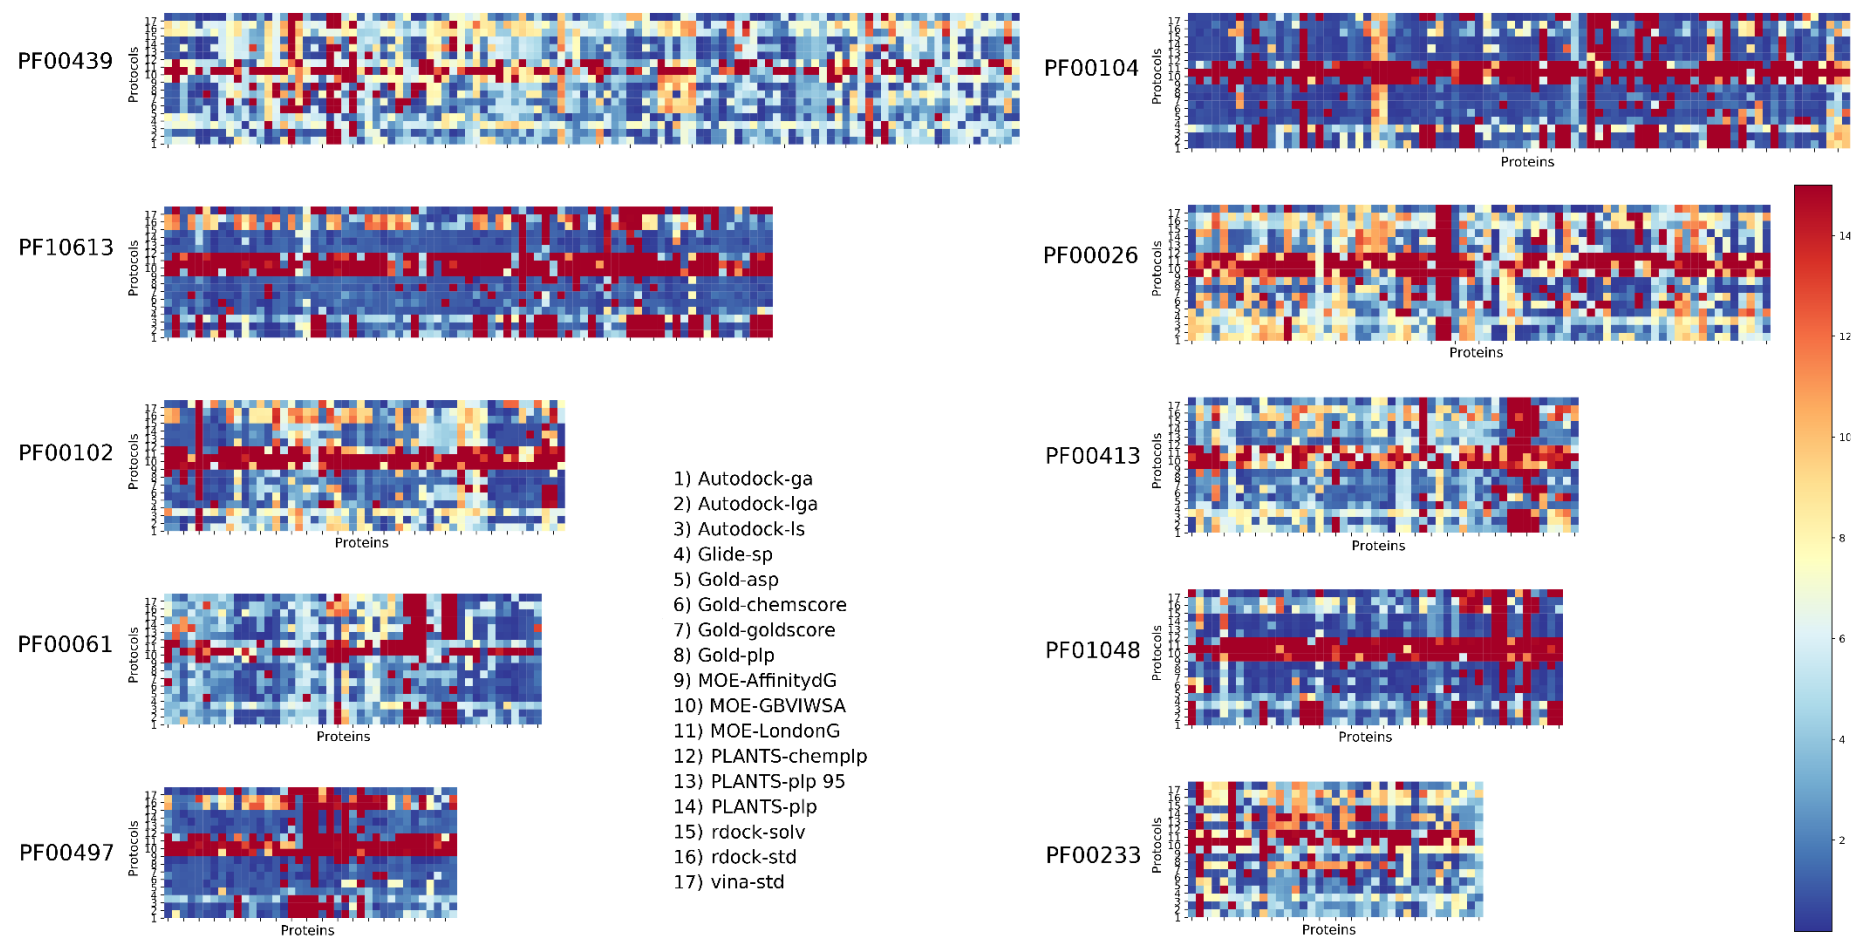

**Figure S3.** DockBench Results divided by Pfam protein families. The heatmaps RMSD of the best solution, according to the scoring function, among the 20 generated. The ten families are: PF00439, Bromodomain; PF10613, Ligated ion channel L-glutamate and glycine-binding site; PF00102, Protein tyrosine phosphatases; PF000061 Lipocalin; PF00497, Bacterial extracellular solute-binding proteins family 3; PF00104, Hormone receptors; PF00026, Eukaryotic aspartyl protease Peptidase M\_10; PF01048, Phosphorylase superfamily; PF00233, 3'5'-cyclic nucleotide phosphodiesterases.

Figure S4

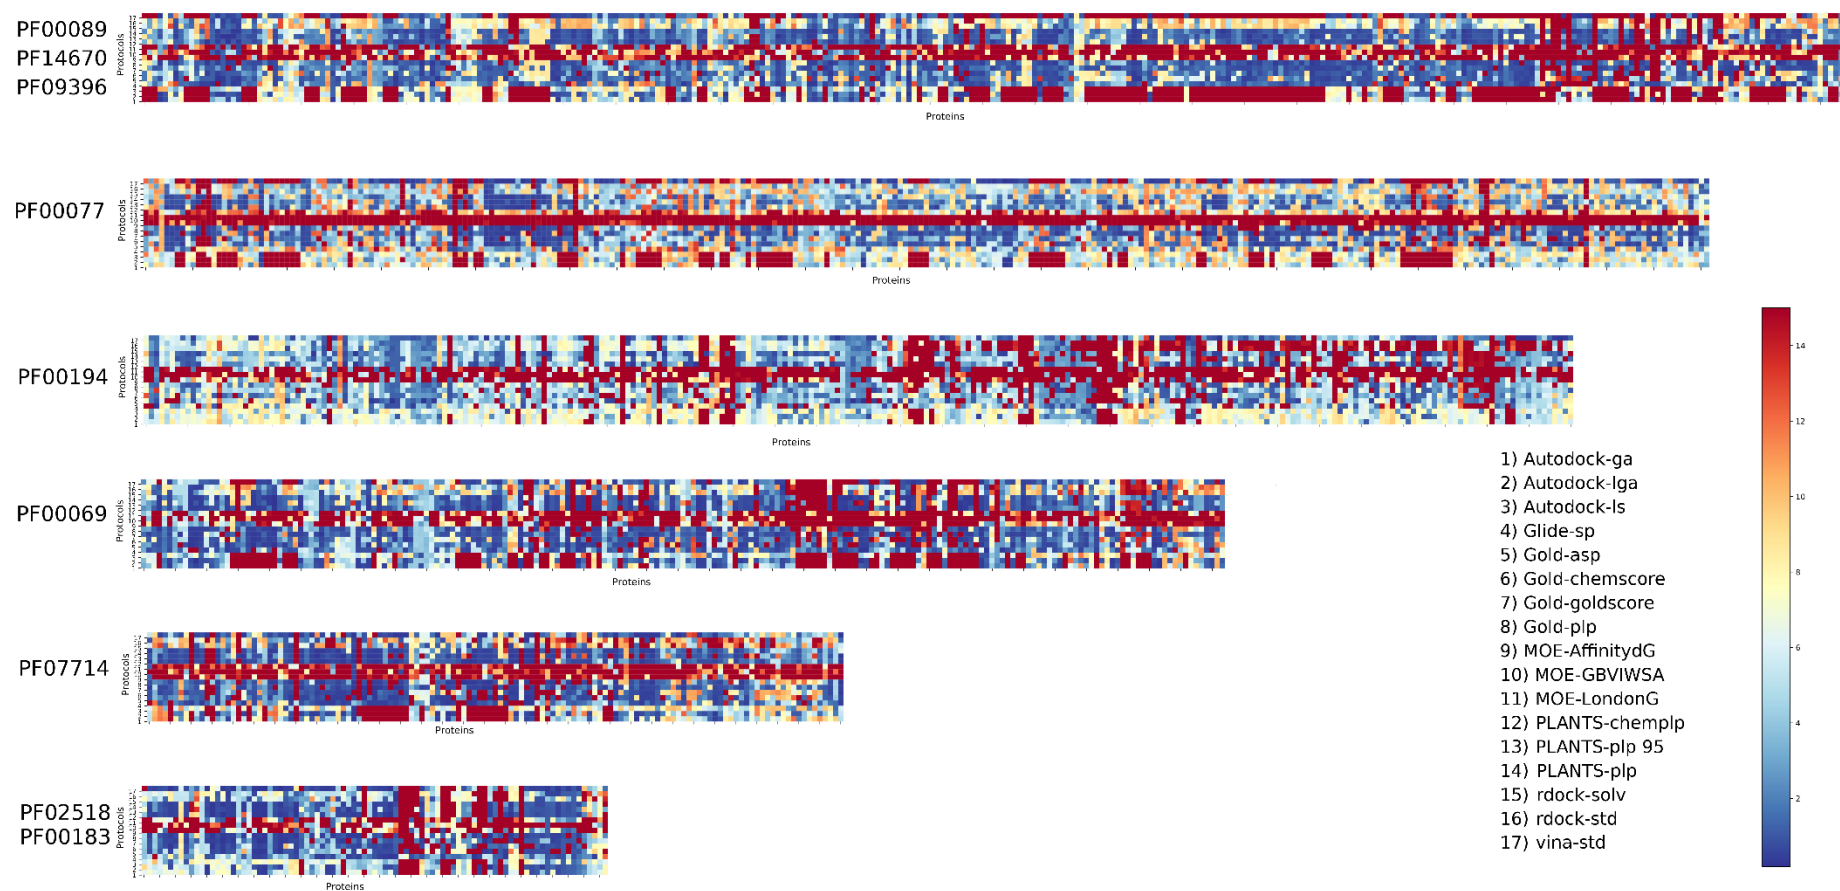

**Figure S4.** DockBench Results divided by Pfam protein families. The heatmaps RMSD of the best solution, according to the scoring function, among the 20 generated (continued from figure S3). The six families are PF00089 Trypsin, PF14670 Coagulation Factor Xa inhibitory site, PF09396 Thrombin light chain, PF00077 Retroviral aspartyl proteases, PF00194 carbonic anhydrases, PF00069 protein kinase, PF07714 tyrosine kinase, PF02518 GHKL domain, PF00183 HSP90.

Figure S5

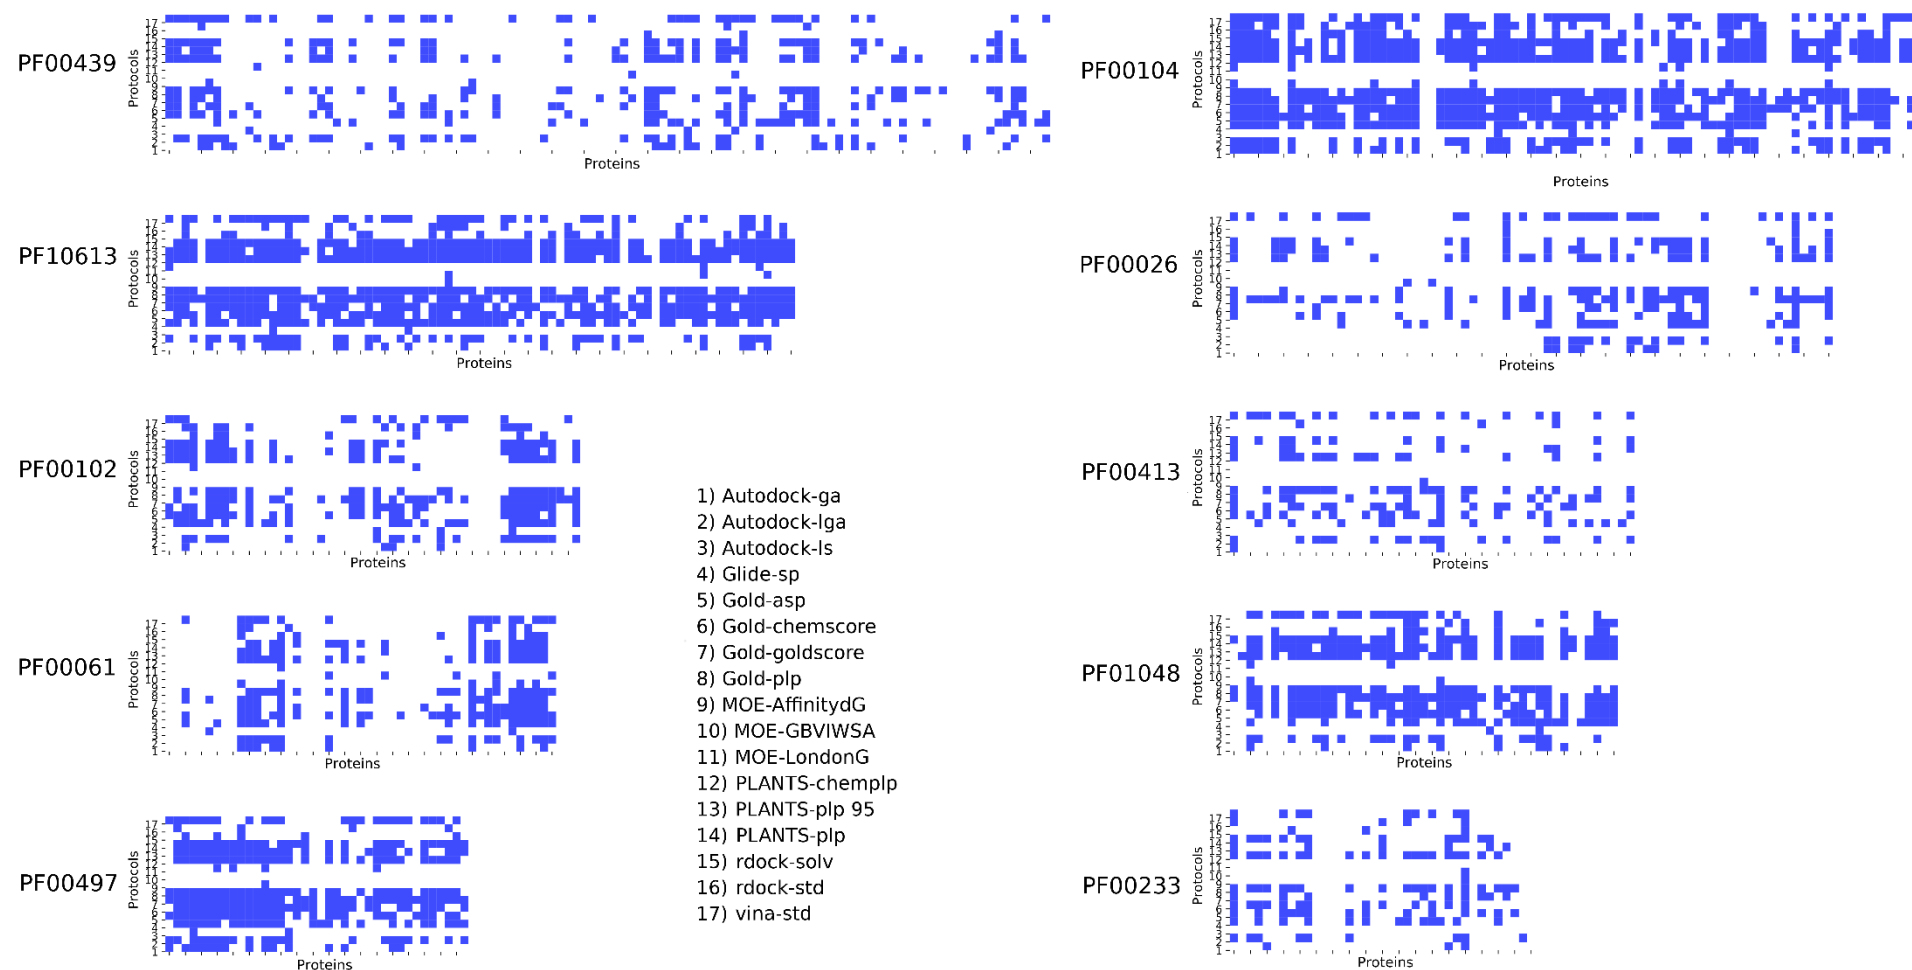

**Figure S5.** DockBench Results divided by Pfam protein families. The heatmaps show in blue the cases in which the docking run reported at best solution a conformation having an RMSD lower than 1.5 Å. The ten families are: PF00439, Bromodomain; PF10613, Ligated ion channel L-glutamate and glycine-binding

site; PF00102, Protein tyrosine phosphatases; PF000061 Lipocalin; PF00497, Bacterial extracellular solute-binding proteins family 3; PF00104, Hormone receptors; PF00026, Eukaryotic aspartyl protease Peptidase M\_10; PF01048, Phosphorylase superfamily; PF00233, 3'5'-cyclic nucleotide phosphodiesterases.

Figure S6

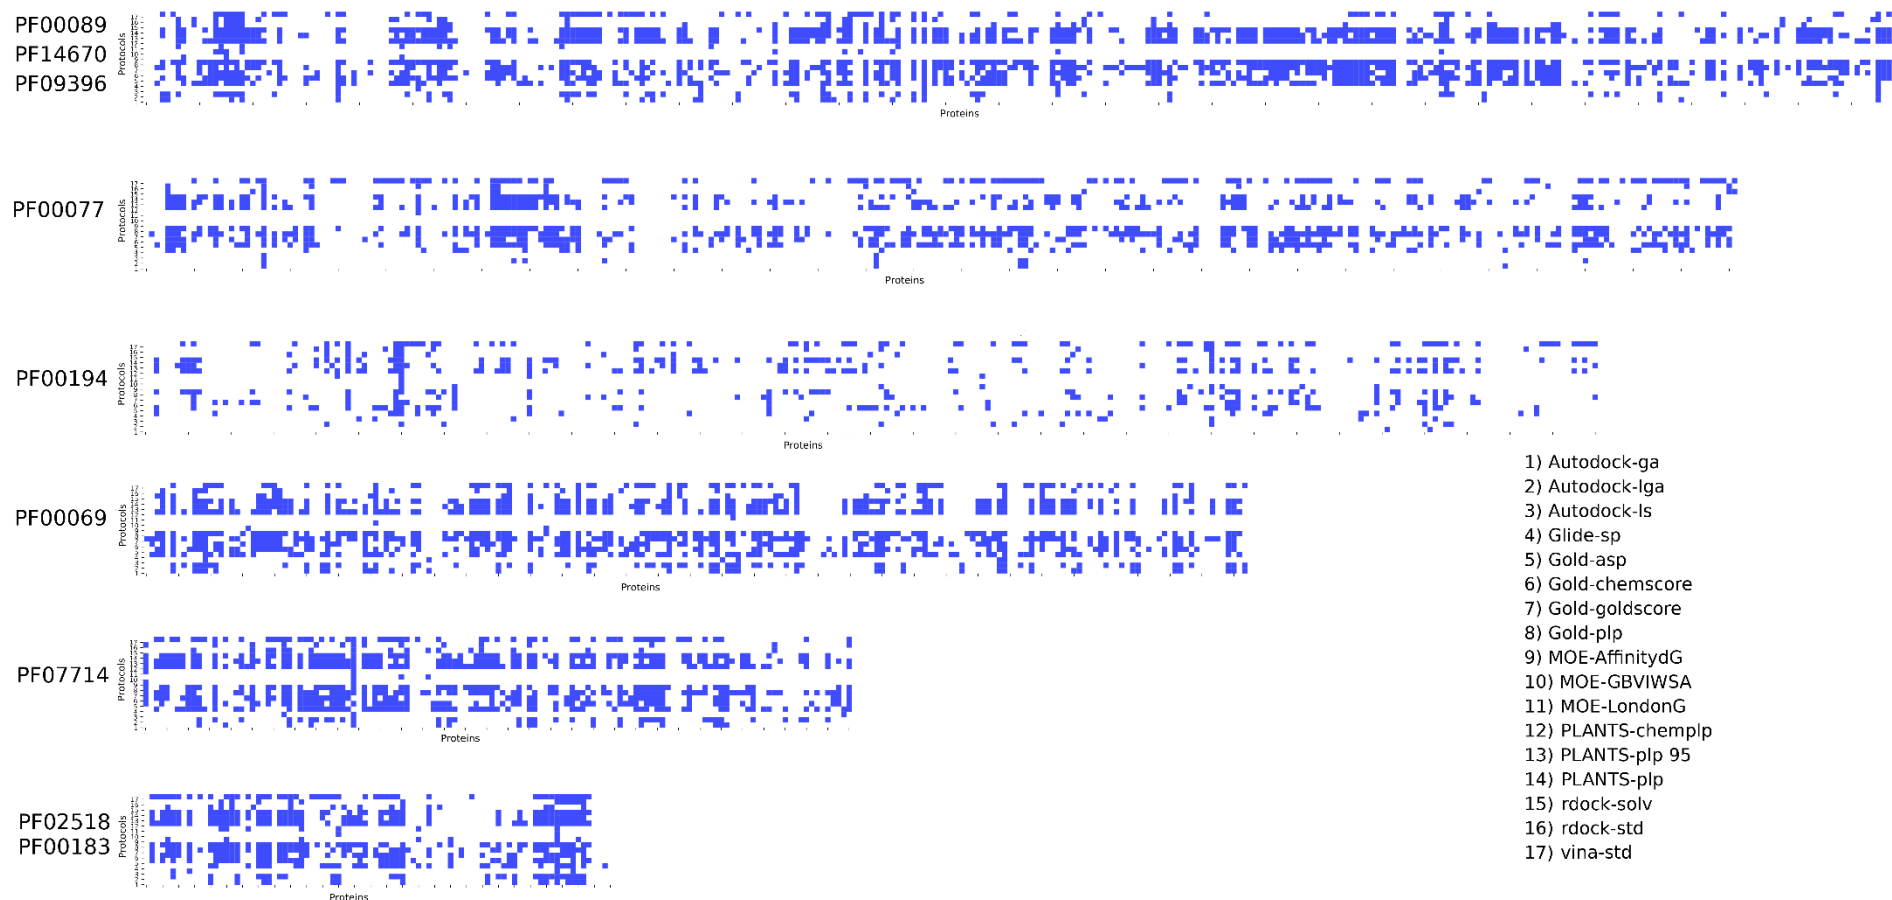

**Figure S6.** DockBench Results divided by Pfam protein families. The heatmaps show in blue the cases in which the docking run reported at best solution a conformation having an RMSD lower than 1.5 Å (continued from figure S5). The six families are PF00089 Trypsin, PF14670 Coagulation Factor Xa inhibitory site, PF09396 Thrombin light chain, PF00077 Retroviral aspartyl proteases, PF00194 carbonic anhydrases, PF00069 protein kinase, PF07714 tyrosine kinase, PF02518 GHKL domain, PF00183 HSP90.

Table S1

| <b>Pfam Family</b>            | <b>Protein Description</b>                                | <b>% of runs with the first poses with RMSD &lt; 1.5 Å</b> |
|-------------------------------|-----------------------------------------------------------|------------------------------------------------------------|
| PF00104                       | Ligand-binding domain of nuclear hormone receptor         | 50.42                                                      |
| PF00497                       | Bacterial extracellular solute-binding proteins, family 3 | 47.60                                                      |
| PF10613                       | Ligated ion channel L-glutamate- and glycine-binding site | 49.33                                                      |
| PF01048                       | Phosphorylase superfamily                                 | 41.75                                                      |
| PF00102                       | Protein-tyrosine phosphatase                              | 28.93                                                      |
| PF00069                       | Protein kinase domain                                     | 29.15                                                      |
| PF00061                       | Lipocalin / cytosolic fatty-acid binding protein family   | 27.21                                                      |
| PF02518<br>PF00183            | Hsp90 protein                                             | 31.84                                                      |
| PF07714                       | Protein tyrosine kinase                                   | 31.79                                                      |
| PF00089<br>PF14670<br>PF09396 | Trypsin                                                   | 27.99                                                      |
| PF00233                       | 3'5'-cyclic nucleotide phosphodiesterase                  | 21.75                                                      |
| PF00439                       | Bromodomain                                               | 19.60                                                      |
| PF00026                       | Eukaryotic aspartyl protease                              | 19.57                                                      |
| PF00413                       | Matrixin                                                  | 19.06                                                      |
| PF00077                       | Retroviral aspartyl protease                              | 18.78                                                      |
| PF00194                       | Eukaryotic-type carbonic anhydrase                        | 10.84                                                      |

**Table S1.** The percentage within the protein family of docking runs having successfully fulfilled the criteria of placing as first pose a conformation with RMSD value lower than 1.5 Å.
