# Supplementary material for: Can We Still Trust Docking Results? An Extension of the Applicability of DockBench on PDBbind Database
Source: Int J Mol Sci. 2019 Jul 20;20(14):3558. doi: 10.3390/ijms20143558 (PMC6679043; doi:10.3390/ijms20143558)
Supplement: Supplementary file 1 [file ijms-20-03558-s001.zip › Dockbench_PDBbind2018.xlsx]

## Sheet: Foglio2
#NAME	RMSDmax	RMSDmin	RMSDave	N(RMSD<R)	RESOLUTION	Pscore	Complex Resolution
001-1j4r_min-autodock-ga	752580913332	318289206366	6042443270904	0	180	0	1.8
001-1j4r_min-autodock-lga	753547899532	557205368483	6533252092709	0	180	0	1.8
001-1j4r_min-autodock-ls	819905514611	626935997797	75152790958605	0	180	0	1.8
001-1j4r_min-glide-sp	901994901633	449030925317	7978534221291	0	180	0	1.8
001-1j4r_min-gold-asp	10121091	30123812351	7003047314817	0	180	0	1.8
001-1j4r_min-gold-chemscore	914620211264	502215973524	70684016484505	0	180	0	1.8
001-1j4r_min-gold-goldscore	8636941712	219846902053	66977378901495	0	180	0	1.8
001-1j4r_min-gold-plp	96114717262	46930508696	67835202625575	0	180	0	1.8
001-1j4r_min-moe-AffinitydG	237078657454	60013118788	128732273996685	0	180	0	1.8
001-1j4r_min-moe-GBVIWSA	276404955809	945044433171	197063853478055	0	180	0	1.8
001-1j4r_min-moe-LondondG	103693864685	403255564679	74309227822065	0	180	0	1.8
001-1j4r_min-plants-chemplp	104256946339	480173580404	7251723637658	0	180	0	1.8
001-1j4r_min-plants-plp95	436292988428	134345636095	2992593128816	2	180	0	1.8
001-1j4r_min-plants-plp	794946419111	115335617473	38878431583385	2	180	0	1.8
001-1j4r_min-rdock-solv	790251682798	310506809795	6012480882871	0	180	0	1.8
001-1j4r_min-rdock-std	816663280102	409379942007	63712300558595	0	180	0	1.8
001-1j4r_min-vina-std	973972053786	109306037243	5101486408771	4	180	0	1.8
00P-1d9i_min-autodock-ga	83729599234	203916827965	5605245279943	2	230	0	2.3
00P-1d9i_min-autodock-lga	778987696056	130193718137	5421546457303	2	230	0	2.3
00P-1d9i_min-autodock-ls	926925773564	433441943266	69616339383915	0	230	0	2.3
00P-1d9i_min-glide-sp	106802310941	249988011694	6160989246467	0	230	0	2.3
00P-1d9i_min-gold-asp	90266145695	188001570625	72292051555185	1	230	0	2.3
00P-1d9i_min-gold-chemscore	912792626934	117385425932	71323337803535	1	230	0	2.3
00P-1d9i_min-gold-goldscore	971126235497	289990742611	59251642530695	0	230	0	2.3
00P-1d9i_min-gold-plp	88505359465	183159120356	62705580413285	2	230	0	2.3
00P-1d9i_min-moe-AffinitydG	318254790623	484603460824	16645631668647	0	230	0	2.3
00P-1d9i_min-moe-GBVIWSA	292331441927	891650227999	184764563640395	0	230	0	2.3
00P-1d9i_min-moe-LondondG	115920858674	367442322829	7977134683883	0	230	0	2.3
00P-1d9i_min-plants-chemplp	965419608798	367862061739	69243218032135	0	230	0	2.3
00P-1d9i_min-plants-plp95	988089001044	37547449886	6607733292604	0	230	0	2.3
00P-1d9i_min-plants-plp	903235808301	235791071361	56261014111085	0	230	0	2.3
00P-1d9i_min-rdock-solv	985945134796	332842978295	7205431158336	0	230	0	2.3
00P-1d9i_min-rdock-std	972887725032	391927029943	69081079234285	0	230	0	2.3
00P-1d9i_min-vina-std	97199598032	803525112278	67924246712179	1	230	0	2.3
00R-1d6w_min-autodock-ga	872426736179	399957479835	7032124945918	0	200	0	2
00R-1d6w_min-autodock-lga	851165365202	427323507427	69563857698615	0	200	0	2
00R-1d6w_min-autodock-ls	845057891988	590541497729	7526560755898	0	200	0	2
00R-1d6w_min-glide-sp	133966072108	726981218448	11143240761702	0	200	0	2
00R-1d6w_min-gold-asp	891693672842	107092292919	384289604773	1	200	0	2
00R-1d6w_min-gold-chemscore	958133085248	250761017009	4573773160741	0	200	0	2
00R-1d6w_min-gold-goldscore	493610218911	133919030125	35368937190295	2	200	0	2
00R-1d6w_min-gold-plp	813638793001	636296343292	36965124828906	3	200	0	2
00R-1d6w_min-moe-AffinitydG	355554831313	632675821519	18974623758961	0	200	0	2
00R-1d6w_min-moe-GBVIWSA	387132477734	838343225686	24486056646828	0	200	0	2
00R-1d6w_min-moe-LondondG	331415204686	818112704025	231609003122275	0	200	0	2
00R-1d6w_min-plants-chemplp	458984561078	935751918209	265519573859095	7	200	0	2
00R-1d6w_min-plants-plp95	994690238738	201577574532	41532685193075	0	200	0	2
00R-1d6w_min-plants-plp	101442769692	102423771919	58301491576905	3	200	0	2
00R-1d6w_min-rdock-solv	103148658182	284328751491	7626238724966	0	200	0	2
00R-1d6w_min-rdock-std	102826813447	268103253047	80367404706975	0	200	0	2
00R-1d6w_min-vina-std	995326152032	117521421854	67511108903625	1	200	0	2
01S-1jaq_min-autodock-ga	765619732168	367611051572	65330391350605	0	240	0	2.4
01S-1jaq_min-autodock-lga	719689243784	363033939119	6097294590491	0	240	0	2.4
01S-1jaq_min-autodock-ls	793580393803	725313561421	7597736446257	0	240	0	2.4
01S-1jaq_min-glide-sp	722329425513	505511560181	6094374142746	0	240	0	2.4
01S-1jaq_min-gold-asp	581888483421	113050775529	5097183952563	1	240	0	2.4
01S-1jaq_min-gold-chemscore	663172335998	469103982234	55574950582655	0	240	0	2.4
01S-1jaq_min-gold-goldscore	73376611236	380902861808	54751086247525	0	240	0	2.4
01S-1jaq_min-gold-plp	766446367682	545196664744	63659768060955	0	240	0	2.4
01S-1jaq_min-moe-AffinitydG	261363243144	239399763297	137996514562415	1	240	0	2.4
01S-1jaq_min-moe-GBVIWSA	289782504738	239399763297	16074085835259	1	240	0	2.4
01S-1jaq_min-moe-LondondG	77807924679	239399763297	539770042126	1	240	0	2.4
01S-1jaq_min-plants-chemplp	726655546561	501900595062	58487223067955	0	240	0	2.4
01S-1jaq_min-plants-plp95	68285537848	235061421568	4242186909906	1	240	0	2.4
01S-1jaq_min-plants-plp	700791437842	479445793232	5943975666667	0	240	0	2.4
01S-1jaq_min-rdock-solv	884712525188	420496557282	62050256594505	0	240	0	2.4
01S-1jaq_min-rdock-std	906999679519	446449673941	6023034971189	0	240	0	2.4
01S-1jaq_min-vina-std	774820204029	130323800041	5678895618037	1	240	0	2.4
0D3-1jao_min-autodock-ga	865589792884	88421775907	50431528127775	2	240	0	2.4
0D3-1jao_min-autodock-lga	683608007028	105348128516	3901040325992	5	240	0	2.4
0D3-1jao_min-autodock-ls	673623822052	459492728699	5652993464109	0	240	0	2.4
0D3-1jao_min-glide-sp	623278313294	753035722019	227450278160885	14	240	1	2.4
0D3-1jao_min-gold-asp	876428190732	840404247696	205322683627155	15	240	2	2.4
0D3-1jao_min-gold-chemscore	502200975276	748309346886	18947842174956	16	240	2	2.4
0D3-1jao_min-gold-goldscore	766560649783	930905308142	23259828248296	18	240	2	2.4
0D3-1jao_min-gold-plp	586337080596	740069229256	17066378671602	17	240	2	2.4
0D3-1jao_min-moe-AffinitydG	282640186722	182652470555	10376004322079	1	240	0	2.4
0D3-1jao_min-moe-GBVIWSA	286111382809	787354362868	1725660354588	0	240	0	2.4
0D3-1jao_min-moe-LondondG	798890901927	182652470555	5883658328402	1	240	0	2.4
0D3-1jao_min-plants-chemplp	637040517357	121488402645	31965554830445	13	240	1	2.4
0D3-1jao_min-plants-plp95	708727905883	108861534508	3802945480436	10	240	0	2.4
0D3-1jao_min-plants-plp	714456959509	140339991287	2993884473252	13	240	1	2.4
0D3-1jao_min-rdock-solv	739538504373	588036089802	68109531609075	0	240	0	2.4
0D3-1jao_min-rdock-std	754521141176	543155730862	6818695743381	0	240	0	2.4
0D3-1jao_min-vina-std	848078233956	127738925868	5319052205044	3	240	0	2.4
0ED-1cgl_min-autodock-ga	937119377312	534694165128	7682336471231	0	240	0	2.4
0ED-1cgl_min-autodock-lga	109352099446	607894966439	8872044945873	0	240	0	2.4
0ED-1cgl_min-autodock-ls	105679198142	739125968966	9119987902849	0	240	0	2.4
0ED-1cgl_min-glide-sp	126721842693	209047586629	53774909733765	1	240	0	2.4
0ED-1cgl_min-gold-asp	131425407792	323857343107	91876712592645	0	240	0	2.4
0ED-1cgl_min-gold-chemscore	134032619811	221774213369	73174691481425	1	240	0	2.4
0ED-1cgl_min-gold-goldscore	122760103335	27982468066	53585587539645	0	240	0	2.4
0ED-1cgl_min-gold-plp	117764171175	264623943768	78286571093385	0	240	0	2.4
0ED-1cgl_min-moe-AffinitydG	305308169232	842060475131	210770869015155	0	240	0	2.4
0ED-1cgl_min-moe-GBVIWSA	311510046654	842060475131	230475471649455	0	240	0	2.4
0ED-1cgl_min-moe-LondondG	299583702505	106715394901	2479822727642	0	240	0	2.4
0ED-1cgl_min-plants-chemplp	110432838975	26973139905	5593113066216	0	240	0	2.4
0ED-1cgl_min-plants-plp95	116878389294	38964780179	69927380375085	0	240	0	2.4
0ED-1cgl_min-plants-plp	116028459721	229194124619	55482052630385	1	240	0	2.4
0ED-1cgl_min-rdock-solv	102078040049	348273373481	81560965859585	0	240	0	2.4
0ED-1cgl_min-rdock-std	898970186424	623162893293	764534235366	0	240	0	2.4
0ED-1cgl_min-vina-std	113953619532	193547793122	60437853856865	2	240	0	2.4
0EM-1gvw_min-autodock-ga	962675438105	349922219308	704436260951	0	100	0	1
0EM-1gvw_min-autodock-lga	100440134906	36143109813	7626886328807	0	100	0	1
0EM-1gvw_min-autodock-ls	850112121761	344617670003	57812608078425	0	100	0	1
0EM-1gvw_min-glide-sp	130237633152	339563079009	10063453734108	0	100	0	1
0EM-1gvw_min-gold-asp	129275690338	521916592853	109369253828105	0	100	0	1
0EM-1gvw_min-gold-chemscore	125078743985	817192622084	10630274652817	0	100	0	1
0EM-1gvw_min-gold-goldscore	11827418854	148360733943	6951653172381	0	100	0	1
0EM-1gvw_min-gold-plp	119930803016	682150109483	104464871149275	0	100	0	1
0EM-1gvw_min-moe-AffinitydG	353095207443	940929026455	257898853591725	0	100	0	1
0EM-1gvw_min-moe-GBVIWSA	364958002206	940929026455	258125409411075	0	100	0	1
0EM-1gvw_min-moe-LondondG	326749680433	109721533042	28088629533105	0	100	0	1
0EM-1gvw_min-plants-chemplp	109000895186	624206940921	94367203942395	0	100	0	1
0EM-1gvw_min-plants-plp95	121158301055	384569098388	99881453916365	0	100	0	1
0EM-1gvw_min-plants-plp	1192003421	431047087196	97940213936365	0	100	0	1
0EM-1gvw_min-rdock-solv	113731009646	473550317489	70063711264305	0	100	0	1
0EM-1gvw_min-rdock-std	125136110355	52039116893	7731333568414	0	100	0	1
0EM-1gvw_min-vina-std	113465867986	149550286729	6962863780658	0	100	0	1
0GM-1fq5_min-autodock-ga	110977120717	20184727139	61294769284355	3	240	0	2.4
0GM-1fq5_min-autodock-lga	112102674388	148768337986	45856102327375	7	240	0	2.4
0GM-1fq5_min-autodock-ls	108261162972	300102899826	5061191405725	0	240	0	2.4
0GM-1fq5_min-gold-asp	236385292826	163640433115	20624808784235	20	240	2	2.4
0GM-1fq5_min-gold-chemscore	2370709568	897761459086	167300674506765	20	240	2	2.4
0GM-1fq5_min-gold-goldscore	191415475042	497577768764	127507789669675	20	240	3	2.4
0GM-1fq5_min-gold-plp	238925069507	650046077151	154579747881695	20	240	2	2.4
0GM-1fq5_min-moe-AffinitydG	372919629893	10879373014	25897506817735	0	240	0	2.4
0GM-1fq5_min-moe-GBVIWSA	377405243624	10879373014	29263126834765	0	240	0	2.4
0GM-1fq5_min-moe-LondondG	341833229988	113289513487	24942079428015	0	240	0	2.4
0GM-1fq5_min-plants-chemplp	239780700167	861350272687	188969074973535	20	240	2	2.4
0GM-1fq5_min-plants-plp95	296958169241	699157696804	19483423225907	18	240	2	2.4
0GM-1fq5_min-plants-plp	239110617771	769918669563	189989162844565	20	240	2	2.4
0GM-1fq5_min-rdock-solv	127315797338	233931864505	89112843065725	1	240	0	2.4
0GM-1fq5_min-rdock-std	121422517686	250806558758	88473553006505	0	240	0	2.4
0GM-1fq5_min-vina-std	775162107916	164340169436	5275285478473	6	240	0	2.4
0P1-1ppm_min-autodock-ga	113754240518	295142228022	81506689445485	0	170	0	1.7
0P1-1ppm_min-autodock-lga	115038475779	564953589329	8860975008725	0	170	0	1.7
0P1-1ppm_min-autodock-ls	108848659856	517057263799	8272528310198	0	170	0	1.7
0P1-1ppm_min-glide-sp	133734628139	190579015309	9057549658425	0	170	0	1.7
0P1-1ppm_min-gold-asp	145291960697	902787905498	11707374225399	0	170	0	1.7
0P1-1ppm_min-gold-chemscore ERR ERR ERR ERR 1.70 0P1-1ppm_min-gold-chemscore ERR							0
0P1-1ppm_min-gold-goldscore	117447024767	737190762448	808104411988055	3	170	0	1.7
0P1-1ppm_min-gold-plp	154965557889	222768711228	11181996405434	0	170	0	1.7
0P1-1ppm_min-moe-AffinitydG	350628664381	108742472832	21714440006555	0	170	0	1.7
0P1-1ppm_min-moe-GBVIWSA	33389601653	108742472832	2189090422929	0	170	0	1.7
0P1-1ppm_min-moe-LondondG	328108664974	11962518658	28358651949725	0	170	0	1.7
0P1-1ppm_min-plants-chemplp	121473601063	365943985299	93626791949725	0	170	0	1.7
0P1-1ppm_min-plants-plp95	127936368635	517019334068	96973020300115	0	170	0	1.7
0P1-1ppm_min-plants-plp	116462661386	19838274937	50413404336785	0	170	0	1.7
0P1-1ppm_min-rdock-solv	128269047109	479635531248	66620247768785	0	170	0	1.7
0P1-1ppm_min-rdock-std	120820841592	44597163887	8183724012344	0	170	0	1.7
0P1-1ppm_min-vina-std	122468204912	152318637668	8382536139617	1	170	0	1.7
0PQ-1os0_min-autodock-ga	95900580171	451478777859	74442963197245	0	210	0	2.1
0PQ-1os0_min-autodock-lga	105080304978	285053167472	7241248981499	0	210	0	2.1
0PQ-1os0_min-autodock-ls	107107090802	392953327654	8642487069145	0	210	0	2.1
0PQ-1os0_min-glide-sp	10972096884	685673764587	8422314224734	0	210	0	2.1
0PQ-1os0_min-gold-asp	14874756282	124838560229	8077838113501	1	210	0	2.1
0PQ-1os0_min-gold-chemscore	120387635633	644351067728	96287301603375	0	210	0	2.1
0PQ-1os0_min-gold-goldscore	104764531257	219593429176	8057382241696	0	210	0	2.1
0PQ-1os0_min-gold-plp	138335102788	104527942676	9039887989555	1	210	0	2.1
0PQ-1os0_min-moe-AffinitydG	307756918966	799127047114	20273417067433	0	210	0	2.1
0PQ-1os0_min-moe-GBVIWSA	347676139762	889005142521	211358552181055	0	210	0	2.1
0PQ-1os0_min-moe-LondondG	267677574038	55349630093	117313732036265	0	210	0	2.1
0PQ-1os0_min-plants-chemplp	724127170587	124152555166	6299521050226	3	210	0	2.1
0PQ-1os0_min-plants-plp95	101042651396	275865037452	75772249120935	0	210	0	2.1
0PQ-1os0_min-plants-plp	101031043943	123773045092	62221937898795	4	210	0	2.1
0PQ-1os0_min-rdock-solv	977946743794	315035461718	5681494366901	0	210	0	2.1
0PQ-1os0_min-rdock-std	996613325317	313386903724	66043159958305	0	210	0	2.1
0PQ-1os0_min-vina-std	10887338771	18540166743	80655361986815	1	210	0	2.1
0Q4-1a94_min-autodock-ga	117239978221	46855771345	8121709070568	0	200	0	2
0Q4-1a94_min-autodock-lga	122308703792	466206431387	8335067388655	0	200	0	2
0Q4-1a94_min-autodock-ls	117332943335	550904424258	9016103058332	0	200	0	2
0Q4-1a94_min-glide-sp	162551690611	145632956858	41403906724205	10	200	0	2
0Q4-1a94_min-gold-asp	179032613797	295457538074	10690064784299	0	200	0	2
0Q4-1a94_min-gold-chemscore	153136530326	288512592296	93237398194835	0	200	0	2
0Q4-1a94_min-gold-goldscore	150002481591	169563334465	8988841372763	1	200	0	2
0Q4-1a94_min-gold-plp	148376283489	220301746804	9381200061445	0	200	0	2
0Q4-1a94_min-moe-AffinitydG	339039051291	176243614244	2630396409506	0	200	0	2
0Q4-1a94_min-moe-GBVIWSA	315442671598	176243614244	2682047710529	0	200	0	2
0Q4-1a94_min-moe-LondondG	319592231948	16748638891	22769656605735	0	200	0	2
0Q4-1a94_min-plants-chemplp	139970907675	792034978927	881584857515	0	200	0	2
0Q4-1a94_min-plants-plp95	137993039863	565257589897	9571170718127	0	200	0	2
0Q4-1a94_min-plants-plp	136055520264	205626784422	9180240705284	0	200	0	2
0Q4-1a94_min-rdock-solv	136330243824	390661894422	7817142160474	0	200	0	2
0Q4-1a94_min-rdock-std	135933509277	465147504641	10235027687225	0	200	0	2
0Q4-1a94_min-vina-std	142257218147	133068537478	88638816337665	1	200	0	2
0Q4-1bai_min-autodock-ga	119888949241	55805261326	9114808968342	0	240	0	2.4
0Q4-1bai_min-autodock-lga	122530765586	500561995994	8646041418553	0	240	0	2.4
0Q4-1bai_min-autodock-ls	78773578375	653222550386	71180828151125	0	240	0	2.4
0Q4-1bai_min-glide-sp	151149164779	189203110131	31431033575215	9	240	0	2.4
0Q4-1bai_min-gold-asp	162358657639	581715509265	104673304805295	0	240	0	2.4
0Q4-1bai_min-gold-chemscore	155965411512	581668285632	10072711033346	0	240	0	2.4
0Q4-1bai_min-gold-goldscore	150494999167	217826030179	97489275627605	2	240	0	2.4
0Q4-1bai_min-gold-plp	155164380849	597803878057	10083123227134	0	240	0	2.4
0Q4-1bai_min-moe-AffinitydG	337822662477	171363737646	2619182643991	0	240	0	2.4
0Q4-1bai_min-moe-GBVIWSA	337822662477	171363737646	26405550174245	0	240	0	2.4
0Q4-1bai_min-moe-LondondG	298561616393	466052445725	173879234048085	0	240	0	2.4
0Q4-1bai_min-plants-chemplp	133833227659	793402149179	9418850297005	0	240	0	2.4
0Q4-1bai_min-plants-plp95	130852898961	212941726125	520100031292	4	240	0	2.4
0Q4-1bai_min-plants-plp	144611872	371953362955	104975948306215	0	240	0	2.4
0Q4-1bai_min-rdock-solv	140207817997	265031441075	9451349216078	0	240	0	2.4
0Q4-1bai_min-rdock-std	142345387619	445467180269	113999591368275	0	240	0	2.4
0Q4-1bai_min-vina-std	144282352478	20587242166	90782106731375	2	240	0	2.4
0QH-1bma_min-autodock-ga	838611659474	452911060119	6660681142442	0	180	0	1.8
0QH-1bma_min-autodock-lga	971812145399	433926304928	65785111018695	0	180	0	1.8
0QH-1bma_min-autodock-ls	590261280213	394600328078	516536050276	0	180	0	1.8
0QH-1bma_min-glide-sp	1321686374	274481244306	8100899378569	0	180	0	1.8
0QH-1bma_min-gold-asp	104572804376	302700335963	62266222347665	0	180	0	1.8
0QH-1bma_min-gold-chemscore	92196651885	327213967554	68158290160885	0	180	0	1.8
0QH-1bma_min-gold-goldscore	964645261824	1110603914	6805027008632	1	180	0	1.8
0QH-1bma_min-gold-plp	910838130113	836167903901	656558909679855	1	180	0	1.8
0QH-1bma_min-moe-AffinitydG	317480385842	633144596226	233351351246115	0	180	0	1.8
0QH-1bma_min-moe-GBVIWSA	335709753346	100145010495	2833636772427	0	180	0	1.8
0QH-1bma_min-moe-LondondG	330326520435	296485859715	31255546454435	0	180	0	1.8
0QH-1bma_min-plants-chemplp	100304895815	402386741829	72816918147935	0	180	0	1.8
0QH-1bma_min-plants-plp95	111762544922	146481511683	5243692249052	2	180	0	1.8
0QH-1bma_min-plants-plp	971952995478	413119860482	61042482039555	0	180	0	1.8
0QH-1bma_min-rdock-solv	129388644022	959749651746	10720057331922	0	180	0	1.8
0QH-1bma_min-rdock-std	128731567046	995816171519	107819067280845	0	180	0	1.8
0QH-1bma_min-vina-std	117424753031	113573744349	70768396143005	1	180	0	1.8
0QN-1ele_min-autodock-ga	883724230273	358849837484	6231841353475	0	200	0	2
0QN-1ele_min-autodock-lga	868466207629	347504800265	56126369143185	0	200	0	2
0QN-1ele_min-autodock-ls	659539967156	312537053803	48462260102725	0	200	0	2
0QN-1ele_min-glide-sp	110144639884	79292342762	5524068805483	2	200	0	2
0QN-1ele_min-gold-asp	601393117021	467870857882	287185694945665	8	200	0	2
0QN-1ele_min-gold-chemscore	122823660581	366481510777	54034614290365	0	200	0	2
0QN-1ele_min-gold-goldscore	159545798775	701335186479	937378646871	20	200	3	2
0QN-1ele_min-gold-plp	879611189543	339938267809	4759895249956	0	200	0	2
0QN-1ele_min-moe-AffinitydG	301690526716	604952543593	216914614960615	0	200	0	2
0QN-1ele_min-moe-GBVIWSA	319060787685	773667333838	21114696523499	0	200	0	2
0QN-1ele_min-moe-LondondG	137613876719	684662414423	10160550135554	0	200	0	2
0QN-1ele_min-plants-chemplp	119797825917	616739801652	1080153341546	0	200	0	2
0QN-1ele_min-plants-plp95	986982993736	911751652892	41759082567954	11	200	1	2
0QN-1ele_min-plants-plp	114344820027	614331359346	8125109687175	0	200	0	2
0QN-1ele_min-rdock-solv	109444839668	904088374811	9950001009367	0	200	0	2
0QN-1ele_min-rdock-std	109014638266	883693426388	9855900287171	0	200	0	2
0QN-1ele_min-vina-std	127551395253	325895270887	8596804158357	0	200	0	2
0Z0-1eld_min-autodock-ga	844213594615	491972862642	609144237109	0	200	0	2
0Z0-1eld_min-autodock-lga	695818062035	180432578695	53755105406725	1	200	0	2
0Z0-1eld_min-autodock-ls	583180880251	381410374714	49518379457195	0	200	0	2
0Z0-1eld_min-glide-sp	122017441491	111131310688	8547242571189	1	200	0	2
0Z0-1eld_min-gold-asp	902020866199	421291550635	4837574724245	0	200	0	2
0Z0-1eld_min-gold-chemscore	118102896311	43471690849	7517339019248	0	200	0	2
0Z0-1eld_min-gold-goldscore	738479921395	111041433217	43937179764105	5	200	0	2
0Z0-1eld_min-gold-plp	92784372943	448373791935	59670320303165	0	200	0	2
0Z0-1eld_min-moe-AffinitydG	3209776403	961144571789	224949193480495	0	200	0	2
0Z0-1eld_min-moe-GBVIWSA	355959943248	821350749828	218654824333135	0	200	0	2
0Z0-1eld_min-moe-LondondG	287895179804	213179231669	25240233707755	0	200	0	2
0Z0-1eld_min-plants-chemplp	958396917032	540290375974	6423606692348	0	200	0	2
0Z0-1eld_min-plants-plp95	942683243193	101206807038	51645448952075	7	200	0	2
0Z0-1eld_min-plants-plp	857172758126	173016376822	6193863078305	1	200	0	2
0Z0-1eld_min-rdock-solv	106675297863	413872532342	76577680657655	0	200	0	2
0Z0-1eld_min-rdock-std	107400817479	280410234899	65419461777385	0	200	0	2
0Z0-1eld_min-vina-std	119036161185	285177163967	83186829557615	0	200	0	2
0Z1-1ela_min-autodock-ga	840012714003	327889475472	59938362406705	0	200	0	2
0Z1-1ela_min-autodock-lga	907886027401	512627160139	69440171026765	0	200	0	2
0Z1-1ela_min-autodock-ls	891398944427	511362358375	6270932239671	0	200	0	2
0Z1-1ela_min-gold-asp	685968855964	102051892116	4226017449534	2	200	0	2
0Z1-1ela_min-gold-chemscore	101950840881	728688743352	65935982158346	1	200	0	2
0Z1-1ela_min-gold-goldscore	102533051746	663716890653	35032405269101	10	200	0	2
0Z1-1ela_min-gold-plp	925429495738	105541037827	59306915152295	1	200	0	2
0Z1-1ela_min-moe-AffinitydG	315484592205	486637252607	1931394229341	0	200	0	2
0Z1-1ela_min-moe-GBVIWSA	331511674427	183139210601	2495518991414	0	200	0	2
0Z1-1ela_min-moe-LondondG	254997550797	100724195625	19236109268135	0	200	0	2
0Z1-1ela_min-plants-chemplp	105821432778	446018497497	64596905357315	0	200	0	2
0Z1-1ela_min-plants-plp95	724753332965	731138151916	29018710358728	11	200	1	2
0Z1-1ela_min-plants-plp	106505603407	113006548607	7841196607624	1	200	0	2
0Z1-1ela_min-rdock-solv	129085954036	999244443888	11805681961949	0	200	0	2
0Z1-1ela_min-rdock-std	128033155955	10039918577	11687235452805	0	200	0	2
0Z1-1ela_min-vina-std	108883595642	943711721078	56789545671659	2	200	0	2
0Z3-1elc_min-autodock-ga	903632676417	491306903688	7207698551839	0	175	0	1.75
0Z3-1elc_min-autodock-lga	834835970748	534847103282	7086962471019	0	175	0	1.75
0Z3-1elc_min-autodock-ls	951381803542	791521711993	8731870204664	0	175	0	1.75
0Z3-1elc_min-glide-sp	120344088998	500529747468	8927092504283	0	175	0	1.75
0Z3-1elc_min-gold-asp	89198116267	567410323257	72774529053775	0	175	0	1.75
0Z3-1elc_min-gold-chemscore	134668876298	627281424865	7837438417448	0	175	0	1.75
0Z3-1elc_min-gold-goldscore	786098272292	41376013045	5631180109065	0	175	0	1.75
0Z3-1elc_min-gold-plp	881473821318	618951809996	7486108813124	0	175	0	1.75
0Z3-1elc_min-moe-AffinitydG	312404354368	68207812358	15730064900051	0	175	0	1.75
0Z3-1elc_min-moe-GBVIWSA	339677785032	104268405583	2203972719722	0	175	0	1.75
0Z3-1elc_min-moe-LondondG	3131765201	68207812358	25186009403345	0	175	0	1.75
0Z3-1elc_min-plants-chemplp	69440900735	49336447648	60265846761575	0	175	0	1.75
0Z3-1elc_min-plants-plp95	803351186477	519303122859	68670744991235	0	175	0	1.75
0Z3-1elc_min-plants-plp	909141010414	468952810401	7357131959021	0	175	0	1.75
0Z3-1elc_min-rdock-solv	133053087305	954620668522	10998521394166	0	175	0	1.75
0Z3-1elc_min-rdock-std	139120919365	101880833118	1118270503018	0	175	0	1.75
0Z3-1elc_min-vina-std	952297496846	647500783783	8065781135399	0	175	0	1.75
0Z4-1elb_min-autodock-ga	803866458644	385497797423	6096259921445	0	210	0	2.1
0Z4-1elb_min-autodock-lga	796361625637	411681150524	61956481071935	0	210	0	2.1
0Z4-1elb_min-autodock-ls	813854852855	474507763771	6039997637099	0	210	0	2.1
0Z4-1elb_min-glide-sp	104936439337	351289600403	6214298146897	0	210	0	2.1
0Z4-1elb_min-gold-asp	816986984294	385733544577	51887002001615	0	210	0	2.1
0Z4-1elb_min-gold-chemscore	631788917306	376800554626	5003344605377	0	210	0	2.1
0Z4-1elb_min-gold-goldscore	708924619348	33223249836	49978588295575	0	210	0	2.1
0Z4-1elb_min-gold-plp	558869052215	296888324847	4299506949463	0	210	0	2.1
0Z4-1elb_min-moe-AffinitydG	316261377757	551350031534	19037339995405	0	210	0	2.1
0Z4-1elb_min-moe-GBVIWSA	32466740801	110939446724	23800455485075	0	210	0	2.1
0Z4-1elb_min-moe-LondondG	132940773074	415315752826	8166130733938	0	210	0	2.1
0Z4-1elb_min-plants-chemplp	991743829191	259598053356	64311171405235	0	210	0	2.1
0Z4-1elb_min-plants-plp95	965961440516	46289487109	61054399836165	0	210	0	2.1
0Z4-1elb_min-plants-plp	736541963986	25492607021	5766129582772	0	210	0	2.1
0Z4-1elb_min-rdock-solv	907669377776	681623605456	77756309427955	0	210	0	2.1
0Z4-1elb_min-rdock-std	101227595389	717657106495	7919738278132	0	210	0	2.1
0Z4-1elb_min-vina-std	964901086939	44373144656	69171836232275	0	210	0	2.1
0ZG-1pph_min-autodock-ga	783695960391	231797584112	6692875320821	0	190	0	1.9
0ZG-1pph_min-autodock-lga	750666942347	801123502755	469792866462785	7	190	0	1.9
0ZG-1pph_min-autodock-ls	802971508212	679921903849	72277165588425	0	190	0	1.9
0ZG-1pph_min-glide-sp	689157802048	340482644423	4622771574493	0	190	0	1.9
0ZG-1pph_min-gold-asp	560417143611	151262565329	39118574575745	4	190	0	1.9
0ZG-1pph_min-gold-chemscore	124424355291	103461244838	60768640026505	3	190	0	1.9
0ZG-1pph_min-gold-goldscore	536401425576	753054725767	359596970344635	4	190	0	1.9
0ZG-1pph_min-gold-plp	65316429327	363690339414	4575344074155	0	190	0	1.9
0ZG-1pph_min-moe-AffinitydG	309597483813	598432782357	16366940447571	0	190	0	1.9
0ZG-1pph_min-moe-GBVIWSA	270446214332	661229661565	18572483537509	0	190	0	1.9
0ZG-1pph_min-moe-LondondG	131913857144	377187902333	79096502150915	0	190	0	1.9
0ZG-1pph_min-plants-chemplp	531739644682	146298498694	4130804620776	1	190	0	1.9
0ZG-1pph_min-plants-plp95	590257212699	296761689952	4886890645322	0	190	0	1.9
0ZG-1pph_min-plants-plp	627381072241	34406937162	49848062912035	0	190	0	1.9
0ZG-1pph_min-rdock-solv	126146825885	111758644758	12129956442505	0	190	0	1.9
0ZG-1pph_min-rdock-std	130486830475	110810646571	1199945778478	0	190	0	1.9
0ZG-1pph_min-vina-std	924251639797	178340031027	56874234417325	1	190	0	1.9
0ZI-1fpc_min-autodock-ga ERR ERR ERR ERR 1.90 0ZI-1fpc_min-autodock-ga ERR							0
0ZI-1fpc_min-autodock-lga ERR ERR ERR ERR 1.90 0ZI-1fpc_min-autodock-lga ERR							0
0ZI-1fpc_min-autodock-ls ERR ERR ERR ERR 1.90 0ZI-1fpc_min-autodock-ls ERR							0
0ZI-1fpc_min-glide-sp	983518357356	89368781462	6540985790999	2	230	0	2.3
0ZI-1fpc_min-gold-asp	934922414485	896594402169	309434824276895	9	230	0	2.3
0ZI-1fpc_min-gold-chemscore	905580458839	909099487091	528453799974205	6	230	0	2.3
0ZI-1fpc_min-gold-goldscore	93276944254	926657188732	482253230828645	5	230	0	2.3
0ZI-1fpc_min-gold-plp ERR ERR ERR ERR 2.30 0ZI-1fpc_min-gold-plp ERR							0
0ZI-1fpc_min-moe-AffinitydG	369372415507	855773065045	242607939801975	0	230	0	2.3
0ZI-1fpc_min-moe-GBVIWSA	340256879057	9625216146	2267627280501	0	230	0	2.3
0ZI-1fpc_min-moe-LondondG	379081592167	152479592902	2493719212047	0	230	0	2.3
0ZI-1fpc_min-plants-chemplp	582934572207	211676724518	42571209939855	2	230	0	2.3
0ZI-1fpc_min-plants-plp95	935781851967	218710278013	53326716661785	1	230	0	2.3
0ZI-1fpc_min-plants-plp	961937112343	233330845294	6230213279773	0	230	0	2.3
0ZI-1fpc_min-rdock-solv	948921004757	308261823627	74187838062295	0	230	0	2.3
0ZI-1fpc_min-rdock-std	929876380721	452789468104	743415855052	0	230	0	2.3
0ZI-1fpc_min-vina-std ERR ERR ERR ERR 2.30 0ZI-1fpc_min-vina-std ERR							0
0ZN-1tmn_min-autodock-ga	934516682875	53001835952	7619285774323	0	190	0	1.9
0ZN-1tmn_min-autodock-lga	949655685724	59127656014	7849400621343	0	190	0	1.9
0ZN-1tmn_min-autodock-ls	948375975474	583023659162	72413815205215	0	190	0	1.9
0ZN-1tmn_min-glide-sp	139651497538	238035092101	85155320949935	0	190	0	1.9
0ZN-1tmn_min-gold-asp	120662920578	187658241926	76227174130305	1	190	0	1.9
0ZN-1tmn_min-gold-chemscore	117317690839	190941396791	82090079834535	0	190	0	1.9
0ZN-1tmn_min-gold-goldscore	10991453545	974552319053	635977949837815	1	190	0	1.9
0ZN-1tmn_min-gold-plp	162688444273	580062834264	101982264379215	0	190	0	1.9
0ZN-1tmn_min-moe-AffinitydG	324170510997	849048030444	24136871393417	0	190	0	1.9
0ZN-1tmn_min-moe-GBVIWSA	360813175112	850040395511	262326337652305	0	190	0	1.9
0ZN-1tmn_min-moe-LondondG	311981031891	384101972324	125382962044385	0	190	0	1.9
0ZN-1tmn_min-plants-chemplp	839108624431	168133592751	40143707724665	1	190	0	1.9
0ZN-1tmn_min-plants-plp95	863397159099	294845493282	50024265657005	0	190	0	1.9
0ZN-1tmn_min-plants-plp	843935874727	181625363569	38799593100315	1	190	0	1.9
0ZN-1tmn_min-rdock-solv	108189876003	350983679893	7428691796976	0	190	0	1.9
0ZN-1tmn_min-rdock-std	107802878244	366794798503	8062488434602	0	190	0	1.9
0ZN-1tmn_min-vina-std	117305715291	17011265343	75302436171335	1	190	0	1.9
0ZQ-1lzq_min-autodock-ga ERR ERR ERR ERR 1.90 0ZQ-1lzq_min-autodock-ga ERR							0
0ZQ-1lzq_min-autodock-lga ERR ERR ERR ERR 1.90 0ZQ-1lzq_min-autodock-lga ERR							0
0ZQ-1lzq_min-autodock-ls ERR ERR ERR ERR 1.90 0ZQ-1lzq_min-autodock-ls ERR							0
0ZQ-1lzq_min-glide-sp	143921783296	510375009186	102117681832955	0	220	0	2.2
0ZQ-1lzq_min-gold-asp	148716141362	392159679246	951960629651	0	220	0	2.2
0ZQ-1lzq_min-gold-chemscore	156190037391	178620294452	8465673470546	1	220	0	2.2
0ZQ-1lzq_min-gold-goldscore	11117860845	150241570186	44156661548985	3	220	0	2.2
0ZQ-1lzq_min-gold-plp	147591824526	314366910527	8254240896059	0	220	0	2.2
0ZQ-1lzq_min-moe-AffinitydG	296667507479	17568886095	23063679982835	0	220	0	2.2
0ZQ-1lzq_min-moe-GBVIWSA	297150862291	14863020405	22865149221105	0	220	0	2.2
0ZQ-1lzq_min-moe-LondondG	206901539704	1162178144	15765850106235	0	220	0	2.2
0ZQ-1lzq_min-plants-chemplp	107212173668	41970258648	4765861945283	0	220	0	2.2
0ZQ-1lzq_min-plants-plp95	113597356405	426672490599	7440478196212	0	220	0	2.2
0ZQ-1lzq_min-plants-plp	107777931664	412082850699	57424129337115	0	220	0	2.2
0ZQ-1lzq_min-rdock-solv	115614473878	360466547044	7221235099438	0	220	0	2.2
0ZQ-1lzq_min-rdock-std	112699288855	296622303828	71860956190425	0	220	0	2.2
0ZQ-1lzq_min-vina-std ERR ERR ERR ERR 2.20 0ZQ-1lzq_min-vina-std ERR							0
0ZQ-1m0b_min-autodock-ga ERR ERR ERR ERR 2.20 0ZQ-1m0b_min-autodock-ga ERR							0
0ZQ-1m0b_min-autodock-lga ERR ERR ERR ERR 2.20 0ZQ-1m0b_min-autodock-lga ERR							0
0ZQ-1m0b_min-autodock-ls ERR ERR ERR ERR 2.20 0ZQ-1m0b_min-autodock-ls ERR							0
0ZQ-1m0b_min-glide-sp	130634245081	590900406133	97902551356465	0	245	0	2.45
0ZQ-1m0b_min-gold-asp	157541267316	449071927951	100138316635745	0	245	0	2.45
0ZQ-1m0b_min-gold-chemscore	168866870673	512529788268	9510558303826	0	245	0	2.45
0ZQ-1m0b_min-gold-goldscore	12640416733	980186205881	539133940215305	4	245	0	2.45
0ZQ-1m0b_min-gold-plp	146230221683	177840752889	8466008184761	1	245	0	2.45
0ZQ-1m0b_min-moe-AffinitydG	301088033425	133939913185	23211937627935	0	245	0	2.45
0ZQ-1m0b_min-moe-GBVIWSA	335422733195	132177158314	2403998433295	0	245	0	2.45
0ZQ-1m0b_min-moe-LondondG	209959520037	700642617887	13868489773263	0	245	0	2.45
0ZQ-1m0b_min-plants-chemplp	115120491549	519075366021	78071349698005	0	245	0	2.45
0ZQ-1m0b_min-plants-plp95	100932649741	460148272467	6052578696391	0	245	0	2.45
0ZQ-1m0b_min-plants-plp	115521155687	361926729543	69265431098555	0	245	0	2.45
0ZQ-1m0b_min-rdock-solv	117412249297	230800166165	72452537574005	1	245	0	2.45
0ZQ-1m0b_min-rdock-std	116971663929	21209868828	7585752248722	1	245	0	2.45
0ZQ-1m0b_min-vina-std ERR ERR ERR ERR 2.45 0ZQ-1m0b_min-vina-std ERR							0
0ZR-1iiq_min-autodock-ga	104214305452	378190689789	7053726322037	0	183	0	1.83
0ZR-1iiq_min-autodock-lga	109650803329	398173336725	706972040212	0	183	0	1.83
0ZR-1iiq_min-autodock-ls	749631237317	441410220037	5284268107051	0	183	0	1.83
0ZR-1iiq_min-glide-sp	148978205703	506154368337	114843138709454	0	183	0	1.83
0ZR-1iiq_min-gold-asp	138405705627	243757339091	80529972685065	0	183	0	1.83
0ZR-1iiq_min-gold-chemscore	15511675648	446235857132	89546680592795	0	183	0	1.83
0ZR-1iiq_min-gold-goldscore	1155227516	209608404842	50837327227925	0	183	0	1.83
0ZR-1iiq_min-gold-plp	176002255315	360860394371	9413299720718	0	183	0	1.83
0ZR-1iiq_min-moe-AffinitydG	320144395143	160494740919	24384421805725	0	183	0	1.83
0ZR-1iiq_min-moe-GBVIWSA	320144395143	160494740919	2462484753794	0	183	0	1.83
0ZR-1iiq_min-moe-LondondG	317585996302	143134149657	2578281895845	0	183	0	1.83
0ZR-1iiq_min-plants-chemplp	121171470778	578452677577	400869961997675	10	183	0	1.83
0ZR-1iiq_min-plants-plp95	119780553456	178017007515	54712065352985	1	183	0	1.83
0ZR-1iiq_min-plants-plp	118760351311	202540775096	7353201697415	0	183	0	1.83
0ZR-1iiq_min-rdock-solv	11863541186	118613704867	68390000188585	1	183	0	1.83
0ZR-1iiq_min-rdock-std	118335060161	192360422532	7514330450449	0	183	0	1.83
0ZR-1iiq_min-vina-std	120428049221	191540092562	8342313414538	0	183	0	1.83
0ZS-1zsf_min-autodock-ga ERR ERR ERR ERR 1.83 0ZS-1zsf_min-autodock-ga ERR							0
0ZS-1zsf_min-autodock-lga ERR ERR ERR ERR 1.83 0ZS-1zsf_min-autodock-lga ERR							0
0ZS-1zsf_min-autodock-ls ERR ERR ERR ERR 1.83 0ZS-1zsf_min-autodock-ls ERR							0
0ZS-1zsf_min-glide-sp	13414765041	429893327763	10502900622623	0	198	0	1.98
0ZS-1zsf_min-gold-asp	13877448315	309112429372	88435624791245	0	198	0	1.98
0ZS-1zsf_min-gold-chemscore	144053863656	372591865685	90301783888965	0	198	0	1.98
0ZS-1zsf_min-gold-goldscore	11574604534	251087891802	68961611241365	0	198	0	1.98
0ZS-1zsf_min-gold-plp	140287065656	21733198813	7191579940792	0	198	0	1.98
0ZS-1zsf_min-moe-AffinitydG	301989022074	123067355733	20057108659535	0	198	0	1.98
0ZS-1zsf_min-moe-GBVIWSA	301989022074	137194811762	22999145507395	0	198	0	1.98
0ZS-1zsf_min-moe-LondondG	203376658989	582184000124	141712815959455	0	198	0	1.98
0ZS-1zsf_min-plants-chemplp	109841932546	149306343101	5479179222383	5	198	0	1.98
0ZS-1zsf_min-plants-plp95	114995566583	357684072924	60786150434885	0	198	0	1.98
0ZS-1zsf_min-plants-plp	110862025991	423416943373	5192923236277	0	198	0	1.98
0ZS-1zsf_min-rdock-solv	119695027955	255106054716	72673072595035	0	198	0	1.98
0ZS-1zsf_min-rdock-std	117748707784	220619306717	76593773765765	0	198	0	1.98
0ZS-1zsf_min-vina-std ERR ERR ERR ERR 1.98 0ZS-1zsf_min-vina-std ERR							0
108-1g3d_min-autodock-ga	717031659815	234163150766	5956425199591	0	180	0	1.8
108-1g3d_min-autodock-lga	770650707099	2440631319	43036999422015	0	180	0	1.8
108-1g3d_min-autodock-ls	895826794905	714729923077	7468972823241	0	180	0	1.8
108-1g3d_min-glide-sp	147299902062	993730281195	708793216575375	2	180	0	1.8
108-1g3d_min-gold-asp	308419132341	240991024204	2823881281066	0	180	0	1.8
108-1g3d_min-gold-chemscore	271873823589	228903810751	24859199059885	0	180	0	1.8
108-1g3d_min-gold-goldscore	376826012637	244925107821	2868563108836	0	180	0	1.8
108-1g3d_min-gold-plp	308941528467	236566286681	2700615871493	0	180	0	1.8
108-1g3d_min-moe-AffinitydG	309936574868	527420051929	180559664080895	0	180	0	1.8
108-1g3d_min-moe-GBVIWSA	241047490915	679385649383	151447102321855	0	180	0	1.8
108-1g3d_min-moe-LondondG	230428396471	156327920806	12343502929536	1	180	0	1.8
108-1g3d_min-plants-chemplp	317133670973	109463476718	2178258736691	5	180	0	1.8
108-1g3d_min-plants-plp95	331855077574	126713863557	24323433597905	5	180	0	1.8
108-1g3d_min-plants-plp	310452496139	872436414336	21008036157903	7	180	0	1.8
108-1g3d_min-rdock-solv	115714737448	10048450083	10418230749325	0	180	0	1.8
108-1g3d_min-rdock-std	112048344469	102605150633	10441319841885	0	180	0	1.8
108-1g3d_min-vina-std	116215268942	113733263798	6551145516801	1	180	0	1.8
109-1g3e_min-autodock-ga	723588368114	137774914476	471649623865	1	180	0	1.8
109-1g3e_min-autodock-lga	288886089906	152723148213	24167327996605	1	180	0	1.8
109-1g3e_min-autodock-ls	888466192213	24354910726	7547231897731	0	180	0	1.8
109-1g3e_min-glide-sp	144028271745	136910431068	27567834201875	4	180	0	1.8
109-1g3e_min-gold-asp	280668203159	142129443839	23294507538595	2	180	0	1.8
109-1g3e_min-gold-chemscore	289246202771	108076244547	25392162138785	2	180	0	1.8
109-1g3e_min-gold-goldscore	294315836315	253905060557	27687720151095	0	180	0	1.8
109-1g3e_min-gold-plp	285419751058	262530483362	2721637852057	0	180	0	1.8
109-1g3e_min-moe-AffinitydG	281578214074	16733408464	13837846545949	1	180	0	1.8
109-1g3e_min-moe-GBVIWSA	29035686336	16733408464	15379750771333	1	180	0	1.8
109-1g3e_min-moe-LondondG	284998704682	207177837788	123870726539335	0	180	0	1.8
109-1g3e_min-plants-chemplp	292472873423	138153622784	2283160201915	3	180	0	1.8
109-1g3e_min-plants-plp95	303194766766	210320636788	2533627604267	0	180	0	1.8
109-1g3e_min-plants-plp	295037039898	183916728664	2433519287142	0	180	0	1.8
109-1g3e_min-rdock-solv	75978654197	355943597044	49176489527045	0	180	0	1.8
109-1g3e_min-rdock-std	719965928279	334548080841	4083845034018	0	180	0	1.8
109-1g3e_min-vina-std	115648354583	102605480876	4549531485096	1	180	0	1.8
113-1hlk_min-autodock-ga	642179160292	174206587755	57853648107695	1	250	0	2.5
113-1hlk_min-autodock-lga	636880885048	573827868449	6043089679161	0	250	0	2.5
113-1hlk_min-autodock-ls	674725481053	306445645936	5926841393761	0	250	0	2.5
113-1hlk_min-glide-sp	627567409402	103403732377	47138012688775	6	250	0	2.5
113-1hlk_min-gold-asp	608565648054	398732938591	5858006593471	0	250	0	2.5
113-1hlk_min-gold-chemscore	607216833404	592565168469	6014217781317	0	250	0	2.5
113-1hlk_min-gold-goldscore	631764997902	598321539105	6116041129936	0	250	0	2.5
113-1hlk_min-gold-plp	590447402815	584723549191	5869118707288	0	250	0	2.5
113-1hlk_min-moe-AffinitydG	344916933043	163356096757	154170952024265	2	250	0	2.5
113-1hlk_min-moe-GBVIWSA	344916933043	178805637738	162697090224025	1	250	0	2.5
113-1hlk_min-moe-LondondG	297726045808	193605081006	77529791830205	2	250	0	2.5
113-1hlk_min-plants-chemplp	630960776205	972948816072	49923046890481	3	250	0	2.5
113-1hlk_min-plants-plp95	716872486296	180991919193	53310819674015	1	250	0	2.5
113-1hlk_min-plants-plp	68906985453	15768925743	53931555440515	2	250	0	2.5
113-1hlk_min-rdock-solv	677163895722	464022886987	60637487675745	0	250	0	2.5
113-1hlk_min-rdock-std	72439793881	440858253144	5646542302695	0	250	0	2.5
113-1hlk_min-vina-std	108075421531	105156779434	5747134703015	2	250	0	2.5
120-1ghv_min-autodock-ga ERR ERR ERR ERR 2.50 120-1ghv_min-autodock-ga ERR							0
120-1ghv_min-autodock-lga ERR ERR ERR ERR 2.50 120-1ghv_min-autodock-lga ERR							0
120-1ghv_min-autodock-ls ERR ERR ERR ERR 2.50 120-1ghv_min-autodock-ls ERR							0
120-1ghv_min-glide-sp	915810713142	645470687907	551997167679085	1	185	0	1.85
120-1ghv_min-gold-asp	332535207966	926815268881	234004126771905	4	185	0	1.85
120-1ghv_min-gold-chemscore	763217647881	78850283349	52177067247447	5	185	0	1.85
120-1ghv_min-gold-goldscore	412153665461	223411376519	26122668791155	0	185	0	1.85
120-1ghv_min-gold-plp	669094710045	846928808603	26030418374618	11	185	1	1.85
120-1ghv_min-moe-AffinitydG	360767074688	300922810526	14338926948866	0	185	0	1.85
120-1ghv_min-moe-GBVIWSA	346067071496	412856237882	15875443134257	0	185	0	1.85
120-1ghv_min-moe-LondondG	349157961108	178247838682	2273621830678	0	185	0	1.85
120-1ghv_min-plants-chemplp	288247652649	301774542019	18931673566119	10	185	0	1.85
120-1ghv_min-plants-plp95	379414120815	308465727005	242050411348225	4	185	0	1.85
120-1ghv_min-plants-plp	917695216757	310636693362	253512392146435	6	185	0	1.85
120-1ghv_min-rdock-solv	702782325849	862520025092	27146985210414	4	185	0	1.85
120-1ghv_min-rdock-std	70000154201	825885240849	302208516909495	7	185	0	1.85
120-1ghv_min-vina-std ERR ERR ERR ERR 1.85 120-1ghv_min-vina-std ERR							0
120-1ghz_min-autodock-ga	744879842659	823761111258	39727103917331	6	139	0	1.39
120-1ghz_min-autodock-lga	383752683515	500133455874	10892148778408	16	139	2	1.39
120-1ghz_min-autodock-ls	897423663958	345940237461	7218080198324	0	139	0	1.39
120-1ghz_min-glide-sp	138984125088	843466856117	979853389458735	2	139	0	1.39
120-1ghz_min-gold-asp	207653742714	819363605104	134264262902135	12	139	2	1.39
120-1ghz_min-gold-chemscore	418888657377	432352843234	9774680616421	18	139	3	1.39
120-1ghz_min-gold-goldscore	271768285261	865481946055	217318380642925	2	139	0	1.39
120-1ghz_min-gold-plp	178230910589	11326584964	1457240817264	9	139	0	1.39
120-1ghz_min-moe-AffinitydG	258586889316	207599222948	130798608327365	0	139	0	1.39
120-1ghz_min-moe-GBVIWSA	260814946204	207599222948	169685456413085	0	139	0	1.39
120-1ghz_min-moe-LondondG	2531599192	129406973293	19868753254886	1	139	0	1.39
120-1ghz_min-plants-chemplp	271976756505	500131935225	16307139273028	6	139	0	1.39
120-1ghz_min-plants-plp95	301726858939	518010958023	1798490572439	3	139	0	1.39
120-1ghz_min-plants-plp	288630343975	716850058828	17455094115269	6	139	0	1.39
120-1ghz_min-rdock-solv	713015824937	149034283463	39633357902135	0	139	0	1.39
120-1ghz_min-rdock-std	709786297342	163664562122	35572372352645	0	139	0	1.39
120-1ghz_min-vina-std	126794205932	914017044641	692111835276505	1	139	0	1.39
120-1gi7_min-autodock-ga	763230458057	815886634282	38665072967576	8	179	0	1.79
120-1gi7_min-autodock-lga	257383091499	185533397476	2134330551787	0	179	0	1.79
120-1gi7_min-autodock-ls	739842606661	1946703935	5085984783067	0	179	0	1.79
120-1gi7_min-glide-sp	123184241857	136310751555	5724597126212	4	179	0	1.79
120-1gi7_min-gold-asp	280885864543	148320103581	22968980326365	2	179	0	1.79
120-1gi7_min-gold-chemscore	622341319294	137719610976	22233396240935	16	179	1	1.79
120-1gi7_min-gold-goldscore	299033502805	792127231939	268257953077595	1	179	0	1.79
120-1gi7_min-gold-plp	196022726005	120649520775	15503653733555	19	179	3	1.79
120-1gi7_min-moe-AffinitydG	334289241487	989784345464	21072595420617	0	179	0	1.79
120-1gi7_min-moe-GBVIWSA	290656390072	743837209129	195641647192195	0	179	0	1.79
120-1gi7_min-moe-LondondG	304174247292	134046698226	1960697910632	0	179	0	1.79
120-1gi7_min-plants-chemplp	270980328738	78398889157	18967572796894	9	179	0	1.79
120-1gi7_min-plants-plp95	682930676647	115658189052	25652869891525	4	179	0	1.79
120-1gi7_min-plants-plp	67487894743	866549742248	268457120749535	7	179	0	1.79
120-1gi7_min-rdock-solv	671774561716	191530712008	37261115550375	0	179	0	1.79
120-1gi7_min-rdock-std	678994496517	25668060575	4481251183223	0	179	0	1.79
120-1gi7_min-vina-std	128054289844	111925983531	6546221794377	2	179	0	1.79
121-1ghy_min-autodock-ga ERR ERR ERR ERR 1.79 121-1ghy_min-autodock-ga ERR							0
121-1ghy_min-autodock-lga ERR ERR ERR ERR 1.79 121-1ghy_min-autodock-lga ERR							0
121-1ghy_min-autodock-ls ERR ERR ERR ERR 1.79 121-1ghy_min-autodock-ls ERR							0
121-1ghy_min-glide-sp	872688381735	397942774913	645502308678015	3	185	0	1.85
121-1ghy_min-gold-asp	161228429973	127970056119	59385071821705	20	185	3	1.85
121-1ghy_min-gold-chemscore	70772408954	206156880733	1824039665098	16	185	2	1.85
121-1ghy_min-gold-goldscore	333226006101	177669000969	291990035563	3	185	0	1.85
121-1ghy_min-gold-plp	981561101672	372659606216	68669846186735	20	185	2	1.85
121-1ghy_min-moe-AffinitydG	322300011341	936559127872	107018610234291	3	185	0	1.85
121-1ghy_min-moe-GBVIWSA	336243113081	111112296941	2096295345376	0	185	0	1.85
121-1ghy_min-moe-LondondG	378809160862	936559127872	181197345809516	3	185	0	1.85
121-1ghy_min-plants-chemplp	742643842891	401640472248	24409257323057	10	185	0	1.85
121-1ghy_min-plants-plp95	688448199863	260312483272	32719032756251	4	185	0	1.85
121-1ghy_min-plants-plp	774003439864	395695754337	378005607402435	5	185	0	1.85
121-1ghy_min-rdock-solv	713586518651	401310529456	28068718413218	7	185	0	1.85
121-1ghy_min-rdock-std	702680525503	328383898413	24898113681383	7	185	0	1.85
121-1ghy_min-vina-std ERR ERR ERR ERR 1.85 121-1ghy_min-vina-std ERR							0
122-1gi4_min-autodock-ga	706440709323	506959683853	68681082439025	0	137	0	1.37
122-1gi4_min-autodock-lga	699001311271	107016833403	49302752748345	2	137	0	1.37
122-1gi4_min-autodock-ls	694568281286	916259989534	200004309222985	9	137	0	1.37
122-1gi4_min-glide-sp	149791873507	817879910758	714047650767045	3	137	0	1.37
122-1gi4_min-gold-asp	263544333712	405029317977	104138380823375	18	137	3	1.37
122-1gi4_min-gold-chemscore	854135101803	201215678996	42668751905237	8	137	0	1.37
122-1gi4_min-gold-goldscore	264548736103	177892569517	22620101956555	0	137	0	1.37
122-1gi4_min-gold-plp	259511627039	598410893424	11601689468186	15	137	2	1.37
122-1gi4_min-moe-AffinitydG	29921294452	448956440274	16987542554371	0	137	0	1.37
122-1gi4_min-moe-GBVIWSA	281331686785	633344957557	195752054256645	0	137	0	1.37
122-1gi4_min-moe-LondondG	231189316078	22170119768	18813875438415	0	137	0	1.37
122-1gi4_min-plants-chemplp	719753710888	690668063697	21501261233361	6	137	0	1.37
122-1gi4_min-plants-plp95	39594186872	783367045784	21156948766633	3	137	0	1.37
122-1gi4_min-plants-plp	71629241865	743556692349	2470281445421	4	137	0	1.37
122-1gi4_min-rdock-solv	259277757028	472894314998	182068270070505	7	137	0	1.37
122-1gi4_min-rdock-std	257678824549	824434975253	191255448462215	6	137	0	1.37
122-1gi4_min-vina-std	117934576533	926680834172	64741854101876	1	137	0	1.37
130-1gjc_min-autodock-ga	866067401765	985352647533	791118548580915	1	173	0	1.73
130-1gjc_min-autodock-lga	846949820473	831224322551	8356956530624	0	173	0	1.73
130-1gjc_min-autodock-ls	845513945006	799528883281	8259995872723	0	173	0	1.73
130-1gjc_min-glide-sp	122116736777	165950911465	80701987089715	1	173	0	1.73
130-1gjc_min-gold-asp	197484191145	559763483625	9754464521089	19	173	3	1.73
130-1gjc_min-gold-chemscore	126796792622	132597391166	69705103273535	2	173	0	1.73
130-1gjc_min-gold-goldscore	837030463412	169462636861	2607806069263	1	173	0	1.73
130-1gjc_min-gold-plp	835554203745	220876706785	251404321425585	16	173	1	1.73
130-1gjc_min-moe-AffinitydG	305868387154	852426474014	19061892062812	0	173	0	1.73
130-1gjc_min-moe-GBVIWSA	312974698741	850157765594	21607031988432	0	173	0	1.73
130-1gjc_min-moe-LondondG	251427396805	157984739643	1890263812787	0	173	0	1.73
130-1gjc_min-plants-chemplp	832988802878	281600040483	230452754152255	10	173	0	1.73
130-1gjc_min-plants-plp95	829489311724	230535603324	225936290576945	10	173	0	1.73
130-1gjc_min-plants-plp	878640175958	23346272422	32912859037301	8	173	0	1.73
130-1gjc_min-rdock-solv	992084510951	471525247154	6134053334596	0	173	0	1.73
130-1gjc_min-rdock-std	97059017022	531930095287	6140263001513	0	173	0	1.73
130-1gjc_min-vina-std	122037968305	171014550258	6253833762359	1	173	0	1.73
132-1gj6_min-autodock-ga	895426171419	58124279979	583735860668505	6	150	0	1.5
132-1gj6_min-autodock-lga	873097816355	27832818205	1048437777789	19	150	2	1.5
132-1gj6_min-autodock-ls	898975049068	601221757053	829961204668	0	150	0	1.5
132-1gj6_min-glide-sp	137593077419	897790615087	116650642895005	0	150	0	1.5
132-1gj6_min-gold-asp	151774440992	606228790906	9636144406872	19	150	2	1.5
132-1gj6_min-gold-chemscore	112519907925	35689207052	537984517086845	8	150	0	1.5
132-1gj6_min-gold-goldscore	308376810238	395817075078	76859089856715	18	150	2	1.5
132-1gj6_min-gold-plp	876171230802	25711870201	168756429868095	17	150	1	1.5
132-1gj6_min-moe-AffinitydG	290104521768	875394411109	177932331965545	0	150	0	1.5
132-1gj6_min-moe-GBVIWSA	292867309144	100986243103	2009491273822	0	150	0	1.5
132-1gj6_min-moe-LondondG	894917740956	148560273963	49942370410755	1	150	0	1.5
132-1gj6_min-plants-chemplp	393123062744	333155153852	198394972578715	9	150	0	1.5
132-1gj6_min-plants-plp95	362154849419	231044163278	202705454532875	7	150	0	1.5
132-1gj6_min-plants-plp	87278527092	266052609025	255769573224965	5	150	0	1.5
132-1gj6_min-rdock-solv	878240986286	435307707702	180139852598825	7	150	0	1.5
132-1gj6_min-rdock-std	866134059205	40853440774	17215323577416	9	150	0	1.5
132-1gj6_min-vina-std	124122467718	625420043466	73910962063448	1	150	0	1.5
132-1o5e_min-autodock-ga ERR ERR ERR ERR 1.50 132-1o5e_min-autodock-ga ERR							0
132-1o5e_min-autodock-lga ERR ERR ERR ERR 1.50 132-1o5e_min-autodock-lga ERR							0
132-1o5e_min-autodock-ls ERR ERR ERR ERR 1.50 132-1o5e_min-autodock-ls ERR							0
132-1o5e_min-glide-sp	136151162192	521704822968	69294205569101	2	175	0	1.75
132-1o5e_min-gold-asp	163658345024	323991082498	645944150114	20	175	3	1.75
132-1o5e_min-gold-chemscore	873718913137	413667608111	234557693768725	16	175	1	1.75
132-1o5e_min-gold-goldscore	130589171818	535402357326	8986296432215	20	175	2	1.75
132-1o5e_min-gold-plp	870974631844	510482657733	16433546907174	18	175	2	1.75
132-1o5e_min-moe-AffinitydG	352576765084	491121885232	218146912623035	0	175	0	1.75
132-1o5e_min-moe-GBVIWSA	367376169352	491121885232	204374470177545	0	175	0	1.75
132-1o5e_min-moe-LondondG	275453624681	22597766406	24901723201975	0	175	0	1.75
132-1o5e_min-plants-chemplp	504648394098	320458856714	19154237921704	13	175	1	1.75
132-1o5e_min-plants-plp95	40200262038	35964332812	211750019275605	9	175	0	1.75
132-1o5e_min-plants-plp	416951293411	255198293942	218171104813115	10	175	0	1.75
132-1o5e_min-rdock-solv	885892416068	495117469313	8420651379297	0	175	0	1.75
132-1o5e_min-rdock-std	888120869091	501917184423	86562719157745	0	175	0	1.75
132-1o5e_min-vina-std ERR ERR ERR ERR 1.75 132-1o5e_min-vina-std ERR							0
137-1lbf_min-autodock-ga	705480066892	152085773854	49423316535605	3	205	0	2.05
137-1lbf_min-autodock-lga	635593649584	128623418991	33307320295945	5	205	0	2.05
137-1lbf_min-autodock-ls	69564525786	321896379493	5297007794218	0	205	0	2.05
137-1lbf_min-glide-sp	360076313638	106164124129	1629908447349	17	205	2	2.05
137-1lbf_min-gold-asp	167479501341	879511645374	121823902559765	20	205	3	2.05
137-1lbf_min-gold-chemscore	582027146031	867847424979	260213377571955	13	205	1	2.05
137-1lbf_min-gold-goldscore	469234958736	883634163185	147902779118575	17	205	2	2.05
137-1lbf_min-gold-plp	105746262343	106698615573	41886794379805	10	205	0	2.05
137-1lbf_min-moe-AffinitydG	319781937658	383232853498	20204421679918	0	205	0	2.05
137-1lbf_min-moe-GBVIWSA	319781937658	120136191466	22440969370475	0	205	0	2.05
137-1lbf_min-moe-LondondG	703478904229	190688429005	5041039604118	1	205	0	2.05
137-1lbf_min-plants-chemplp	181636359784	994591981887	145157555054785	20	205	2	2.05
137-1lbf_min-plants-plp95	711058009613	142459884956	2583249302632	9	205	0	2.05
137-1lbf_min-plants-plp	2618327778	699858194953	15369382220595	17	205	2	2.05
137-1lbf_min-rdock-solv	723402438406	139079064736	3448251743508	3	205	0	2.05
137-1lbf_min-rdock-std	718619907779	116018993985	3433198658023	5	205	0	2.05
137-1lbf_min-vina-std	75203078857	132466524073	39631203523665	1	205	0	2.05
139-1jn4_min-autodock-ga	102453669064	505093185415	7708393510509	0	180	0	1.8
139-1jn4_min-autodock-lga	10229491718	507517434371	76809599432195	0	180	0	1.8
139-1jn4_min-autodock-ls	99592199673	743475005024	90190531823965	0	180	0	1.8
139-1jn4_min-glide-sp	123413290043	190764040462	10226043733945	0	180	0	1.8
139-1jn4_min-gold-asp ERR ERR ERR ERR 1.80 139-1jn4_min-gold-asp ERR							0
139-1jn4_min-gold-chemscore	134910089563	539837052452	9246980821139	0	180	0	1.8
139-1jn4_min-gold-goldscore	115720284167	226601734716	45908649698005	0	180	0	1.8
139-1jn4_min-gold-plp	128686832917	283047704351	96775891635685	0	180	0	1.8
139-1jn4_min-moe-AffinitydG	264599155022	77755220725	190608199639055	0	180	0	1.8
139-1jn4_min-moe-GBVIWSA	296140411312	705652294655	205557567673375	0	180	0	1.8
139-1jn4_min-moe-LondondG	188344848913	320395635634	1078070719868	0	180	0	1.8
139-1jn4_min-plants-chemplp	120274324517	241699428719	9088968789822	0	180	0	1.8
139-1jn4_min-plants-plp95	113800964507	270128905428	9946863343608	0	180	0	1.8
139-1jn4_min-plants-plp	113899162347	491053403218	10249607368442	0	180	0	1.8
139-1jn4_min-rdock-solv	125366657339	784723015016	10638375803466	0	180	0	1.8
139-1jn4_min-rdock-std	131365998863	711835968813	10613438876665	0	180	0	1.8
139-1jn4_min-vina-std	109693277803	119520771257	81546327289015	1	180	0	1.8
13P-1ado_min-autodock-ga	832475494534	192918599414	45124140826375	0	190	0	1.9
13P-1ado_min-autodock-lga	466055996636	371761871364	42782517848535	0	190	0	1.9
13P-1ado_min-autodock-ls	909232608302	432739704672	80678881238295	0	190	0	1.9
13P-1ado_min-glide-sp	109256997964	415471097334	68489981603935	0	190	0	1.9
13P-1ado_min-gold-asp	452435911285	385149199973	42109304211955	0	190	0	1.9
13P-1ado_min-gold-chemscore	474440914973	413195806283	44066922352735	0	190	0	1.9
13P-1ado_min-gold-goldscore	467876927578	197588701701	3884970098307	0	190	0	1.9
13P-1ado_min-gold-plp	469764990745	342931792723	3913726548806	0	190	0	1.9
13P-1ado_min-moe-AffinitydG	358960912022	113335600365	23566944465825	0	190	0	1.9
13P-1ado_min-moe-GBVIWSA	394661885859	448206604146	29419384914813	0	190	0	1.9
13P-1ado_min-moe-LondondG	122793238698	101115439523	1119757713669	0	190	0	1.9
13P-1ado_min-plants-chemplp	814022081126	373526100132	4424019932409	0	190	0	1.9
13P-1ado_min-plants-plp95	110890839678	958682995948	10525007125529	0	190	0	1.9
13P-1ado_min-plants-plp	468897373868	381814793336	42300195829025	0	190	0	1.9
13P-1ado_min-rdock-solv	461369397663	314245692126	3854165831788	0	190	0	1.9
13P-1ado_min-rdock-std	987991543425	304189059468	5562437702597	0	190	0	1.9
13P-1ado_min-vina-std	106901277495	177677620988	53245284228085	1	190	0	1.9
146-1bwb_min-autodock-ga	934198477133	599312805394	83780638555395	0	180	0	1.8
146-1bwb_min-autodock-lga	933373211581	402973284354	8263284297354	0	180	0	1.8
146-1bwb_min-autodock-ls	934933184433	598039374311	8361610564795	0	180	0	1.8
146-1bwb_min-glide-sp	138998763755	872032280554	116593983851445	0	180	0	1.8
146-1bwb_min-gold-asp	916463341096	629397397926	178491635823405	17	180	2	1.8
146-1bwb_min-gold-chemscore	532768802593	615595339043	153999190377215	17	180	2	1.8
146-1bwb_min-gold-goldscore	612730083704	39492522955	218224147562445	13	180	1	1.8
146-1bwb_min-gold-plp	103961239139	694467173334	274162476463045	13	180	1	1.8
146-1bwb_min-moe-AffinitydG	303388326949	149067570049	2129409893568	0	180	0	1.8
146-1bwb_min-moe-GBVIWSA	338282940734	171704862524	231646547252	0	180	0	1.8
146-1bwb_min-moe-LondondG	335925046354	122747516866	22166063643485	0	180	0	1.8
146-1bwb_min-plants-chemplp	343932967384	586031335175	10918078345743	18	180	2	1.8
146-1bwb_min-plants-plp95	377367436058	580362728067	96528754719815	19	180	3	1.8
146-1bwb_min-plants-plp	408224047663	579672192959	11772277197604	17	180	3	1.8
146-1bwb_min-rdock-solv	875172138	480289215534	63961107506885	0	180	0	1.8
146-1bwb_min-rdock-std	895722810472	540113671743	64992626379885	0	180	0	1.8
146-1bwb_min-vina-std	126685980651	535847775688	592704825655115	2	180	0	1.8
146-1qbt_min-autodock-ga	918669350465	610076464932	78401963882475	0	210	0	2.1
146-1qbt_min-autodock-lga	923136281397	53309352248	78339540778055	0	210	0	2.1
146-1qbt_min-autodock-ls	902992854257	519135536408	65276686063875	0	210	0	2.1
146-1qbt_min-glide-sp	133504935404	111689629356	12135884691645	0	210	0	2.1
146-1qbt_min-gold-asp	521587015684	470786423222	178656384135495	15	210	2	2.1
146-1qbt_min-gold-chemscore	115980262523	384512588619	29191057120725	12	210	1	2.1
146-1qbt_min-gold-goldscore	603079825653	461466139498	2052092261517	13	210	2	2.1
146-1qbt_min-gold-plp	129134763953	575645151673	2834260188578	12	210	1	2.1
146-1qbt_min-moe-AffinitydG	298247789081	112140441735	21361523801235	0	210	0	2.1
146-1qbt_min-moe-GBVIWSA	32148690317	164186019871	2537409422692	0	210	0	2.1
146-1qbt_min-moe-LondondG	29325740885	112140441735	1489029215197	0	210	0	2.1
146-1qbt_min-plants-chemplp	486022249424	410971347779	4471179652739	0	210	0	2.1
146-1qbt_min-plants-plp95	112117834284	457676406321	78297574855905	20	210	3	2.1
146-1qbt_min-plants-plp	124339564253	462284692342	8437146462298	20	210	3	2.1
146-1qbt_min-rdock-solv	549495546404	446912523935	518137222355	0	210	0	2.1
146-1qbt_min-rdock-std	588702045781	40562382676	52904763639065	0	210	0	2.1
146-1qbt_min-vina-std	120737079547	467940511797	611537086197535	2	210	0	2.1
14A-1t4v_min-autodock-ga ERR ERR ERR ERR 2.10 14A-1t4v_min-autodock-ga ERR							0
14A-1t4v_min-autodock-lga ERR ERR ERR ERR 2.10 14A-1t4v_min-autodock-lga ERR							0
14A-1t4v_min-autodock-ls ERR ERR ERR ERR 2.10 14A-1t4v_min-autodock-ls ERR							0
14A-1t4v_min-glide-sp	586688125002	107076760628	2516927243867	7	200	0	2
14A-1t4v_min-gold-asp	624031804157	36541735297	27797300608385	5	200	0	2
14A-1t4v_min-gold-chemscore	921189552023	446612507873	78317342108385	0	200	0	2
14A-1t4v_min-gold-goldscore	874270993427	941940168541	452750504288805	7	200	0	2
14A-1t4v_min-gold-plp	918467972419	71122580108	8472920290305	0	200	0	2
14A-1t4v_min-moe-AffinitydG	337101305907	43073582821	196882737902145	0	200	0	2
14A-1t4v_min-moe-GBVIWSA	355810125145	157853774835	2382909555406	0	200	0	2
14A-1t4v_min-moe-LondondG	177180507968	984081092714	14219042252107	0	200	0	2
14A-1t4v_min-plants-chemplp	796727381468	768629369819	229518595433325	13	200	1	2
14A-1t4v_min-plants-plp95	956380660335	930655863715	417248500125475	6	200	0	2
14A-1t4v_min-plants-plp	819423814796	791584754125	255218140136475	11	200	1	2
14A-1t4v_min-rdock-solv	103363386275	19979220332	78338109748155	1	200	0	2
14A-1t4v_min-rdock-std	109570322319	481675497532	8020413049584	0	200	0	2
14A-1t4v_min-vina-std ERR ERR ERR ERR 2.00 14A-1t4v_min-vina-std ERR							0
153-1nhu_min-autodock-ga	800487673329	345151350201	4898104641865	20	200	2	2
153-1nhu_min-autodock-lga	419659494006	400486408804	4087130863752	20	200	3	2
153-1nhu_min-autodock-ls	702906890467	327555605273	53959200547675	0	200	0	2
153-1nhu_min-glide-sp	678615424746	448847261826	5911664043752	0	200	0	2
153-1nhu_min-gold-asp	859523742318	563672912628	66687940083385	0	200	0	2
153-1nhu_min-gold-chemscore	669323902647	496494151591	61132992376985	0	200	0	2
153-1nhu_min-gold-goldscore	755700964389	563590180824	6362460795183	0	200	0	2
153-1nhu_min-gold-plp	716255278711	544673925218	61471579207165	0	200	0	2
153-1nhu_min-moe-AffinitydG	378598350962	396977093072	249911700911725	0	200	0	2
153-1nhu_min-moe-GBVIWSA	36782320266	112757962804	24290263321215	0	200	0	2
153-1nhu_min-moe-LondondG	351760836481	26098747494	3159683128529	0	200	0	2
153-1nhu_min-plants-chemplp	751974455165	249114947272	6018600177415	0	200	0	2
153-1nhu_min-plants-plp95	9256278941	467270008434	7848489960885	0	200	0	2
153-1nhu_min-plants-plp	86109242041	158254714804	5441899210209	4	200	0	2
153-1nhu_min-rdock-solv	135644812104	116064763741	12421836735375	0	200	0	2
153-1nhu_min-rdock-std	130959749104	110718231474	122382118542	0	200	0	2
153-1nhu_min-vina-std	743979774896	240408994941	605157401122426	1	200	0	2
156-1fcz_min-autodock-ga	956156181067	299556709526	152578565094305	15	138	1	1.38
156-1fcz_min-autodock-lga	826558281425	409368438596	7011727507405	20	138	2	1.38
156-1fcz_min-autodock-ls	283871182314	245652253459	27058344883955	0	138	0	1.38
156-1fcz_min-glide-sp	283866339981	619268919028	1956058376333	2	138	0	1.38
156-1fcz_min-gold-asp	779694582418	281123835241	60805329322085	20	138	2	1.38
156-1fcz_min-gold-chemscore	109666908561	387598802697	71667182667075	20	138	2	1.38
156-1fcz_min-gold-goldscore	741294578074	257614020064	4619376966829	20	138	3	1.38
156-1fcz_min-gold-plp	814815072862	268139429595	467122762228	20	138	2	1.38
156-1fcz_min-moe-AffinitydG	316024309151	149879787632	207628386292695	0	138	0	1.38
156-1fcz_min-moe-GBVIWSA	312361403245	170472564742	22916911178385	0	138	0	1.38
156-1fcz_min-moe-LondondG	227822162491	178268339849	20366323099495	0	138	0	1.38
156-1fcz_min-plants-chemplp	286563254797	291619524444	180646351446195	9	138	0	1.38
156-1fcz_min-plants-plp95	298626726744	330157239195	18926922239615	8	138	0	1.38
156-1fcz_min-plants-plp	287952174906	34450839478	174072609286	10	138	0	1.38
156-1fcz_min-rdock-solv	286813575154	328828289087	11142165464921	14	138	2	1.38
156-1fcz_min-rdock-std	245448220941	335606958719	6680293196164	19	138	2	1.38
156-1fcz_min-vina-std	962097184781	307815721688	503782420094523	2	138	0	1.38
165-1sb1_min-autodock-ga ERR ERR ERR ERR 1.38 165-1sb1_min-autodock-ga ERR							0
165-1sb1_min-autodock-lga ERR ERR ERR ERR 1.38 165-1sb1_min-autodock-lga ERR							0
165-1sb1_min-autodock-ls ERR ERR ERR ERR 1.38 165-1sb1_min-autodock-ls ERR							0
165-1sb1_min-glide-sp	107002485393	143446979135	6060295926881	1	190	0	1.9
165-1sb1_min-gold-asp	947691077572	260491408313	7737600540868	0	190	0	1.9
165-1sb1_min-gold-chemscore	954571446045	331032646395	78964354162605	0	190	0	1.9
165-1sb1_min-gold-goldscore	938551713979	139202611998	614746732768	4	190	0	1.9
165-1sb1_min-gold-plp	920883631159	154220424634	7017090972457	1	190	0	1.9
165-1sb1_min-moe-AffinitydG	325188776433	531636472095	196282740830825	0	190	0	1.9
165-1sb1_min-moe-GBVIWSA	373349943313	91712653798	2430996197449	0	190	0	1.9
165-1sb1_min-moe-LondondG	281524639961	513766249852	153601749102295	0	190	0	1.9
165-1sb1_min-plants-chemplp	810979458316	882588216699	296280117386795	7	190	0	1.9
165-1sb1_min-plants-plp95	556114585771	113359806414	27873409518365	7	190	0	1.9
165-1sb1_min-plants-plp	810942010275	847199515447	414938063978985	7	190	0	1.9
165-1sb1_min-rdock-solv	905261172307	583212976211	75601322963885	0	190	0	1.9
165-1sb1_min-rdock-std	905656930212	388615527888	7121808433003	0	190	0	1.9
165-1sb1_min-vina-std ERR ERR ERR ERR 1.90 165-1sb1_min-vina-std ERR							0
177-1ta6_min-autodock-ga	807654356764	132339907859	6097877777675	1	190	0	1.9
177-1ta6_min-autodock-lga	843185893627	683465434386	61334349356678	2	190	0	1.9
177-1ta6_min-autodock-ls	758859088409	522906676302	6763168767976	0	190	0	1.9
177-1ta6_min-glide-sp	105222032107	425811474165	6740451274767	0	190	0	1.9
177-1ta6_min-gold-asp	11633454804	671660166884	9049287097489	0	190	0	1.9
177-1ta6_min-gold-chemscore	108019889215	586951927204	85378560041935	0	190	0	1.9
177-1ta6_min-gold-goldscore	827403850483	598322229238	63572007594273	3	190	0	1.9
177-1ta6_min-gold-plp	958524547625	675231712999	79328232103185	0	190	0	1.9
177-1ta6_min-moe-AffinitydG	343367313471	481071871717	203475727363535	0	190	0	1.9
177-1ta6_min-moe-GBVIWSA	35653956683	124985566694	2154833771021	0	190	0	1.9
177-1ta6_min-moe-LondondG	164216967953	70871197958	1304814108842	0	190	0	1.9
177-1ta6_min-plants-chemplp	827001435223	713879846439	30706940585041	13	190	1	1.9
177-1ta6_min-plants-plp95	811302184006	949312122252	37436071704756	9	190	0	1.9
177-1ta6_min-plants-plp	780010381085	765824582335	2437351248449	13	190	1	1.9
177-1ta6_min-rdock-solv	940295560844	53701949242	7386304102219	0	190	0	1.9
177-1ta6_min-rdock-std	97589811285	574079546507	765481379703	0	190	0	1.9
177-1ta6_min-vina-std	82079985214	77140538806	5996165615108	1	190	0	1.9
184-1fcx_min-autodock-ga	237642967495	610345238652	139071946448865	10	147	1	1.47
184-1fcx_min-autodock-lga	241131416452	418087146501	70507289006605	19	147	2	1.47
184-1fcx_min-autodock-ls	920130786244	259907825836	51417759078935	0	147	0	1.47
184-1fcx_min-glide-sp	234520473388	457288845185	101621128318525	3	147	1	1.47
184-1fcx_min-gold-asp	699652795419	284769657673	49801988793195	20	147	2	1.47
184-1fcx_min-gold-chemscore	24591545849	436935027917	76348641168055	19	147	2	1.47
184-1fcx_min-gold-goldscore	684330611015	209445591651	4432030433492	20	147	3	1.47
184-1fcx_min-gold-plp	692988560636	347657988893	52816738034545	20	147	2	1.47
184-1fcx_min-moe-AffinitydG	316254510536	245022224186	205534378041935	0	147	0	1.47
184-1fcx_min-moe-GBVIWSA	331440586344	197489338499	2407864010844	0	147	0	1.47
184-1fcx_min-moe-LondondG	280711455315	158973207459	123989683234955	0	147	0	1.47
184-1fcx_min-plants-chemplp	288517361714	631268434896	177690116186065	8	147	0	1.47
184-1fcx_min-plants-plp95	288944463403	684109511298	17221108685444	9	147	0	1.47
184-1fcx_min-plants-plp	941969946318	634567996954	21774844373892	7	147	0	1.47
184-1fcx_min-rdock-solv	106701481032	386069740439	181003369141005	15	147	1	1.47
184-1fcx_min-rdock-std	936868280701	41750869865	14382924576658	15	147	2	1.47
184-1fcx_min-vina-std	107148283314	592095082066	626619125688354	1	147	0	1.47
192-1y1z_min-autodock-ga	769342021633	163485091063	13887373028445	17	150	2	1.5
192-1y1z_min-autodock-lga	18477723074	985596266227	136324943683235	20	150	3	1.5
192-1y1z_min-autodock-ls	907290816111	433356089146	59872853692705	20	150	2	1.5
192-1y1z_min-glide-sp	151296128354	195489999744	115699349735937	2	150	0	1.5
192-1y1z_min-gold-asp	117433878044	135947186437	6187503287138	20	150	2	1.5
192-1y1z_min-gold-chemscore ERR ERR ERR ERR 1.50 192-1y1z_min-gold-chemscore ERR							0
192-1y1z_min-gold-goldscore ERR ERR ERR ERR 1.50 192-1y1z_min-gold-goldscore ERR							0
192-1y1z_min-gold-plp	11400632466	143625302437	108122104289685	20	150	2	1.5
192-1y1z_min-moe-AffinitydG	278489342727	143032752936	22123310738395	0	150	0	1.5
192-1y1z_min-moe-GBVIWSA	296523294152	129081041404	22059107271095	0	150	0	1.5
192-1y1z_min-moe-LondondG	25656696487	138679128071	21692935402315	0	150	0	1.5
192-1y1z_min-plants-chemplp	133060723307	179717844829	23588363747697	15	150	1	1.5
192-1y1z_min-plants-plp95	122482998464	237891863564	38062344104417	6	150	0	1.5
192-1y1z_min-plants-plp	136749686095	243955295597	559063252416435	4	150	0	1.5
192-1y1z_min-rdock-solv	132341828879	82014651659	9664209348101	0	150	0	1.5
192-1y1z_min-rdock-std	122799160306	871336873438	10950748283015	0	150	0	1.5
192-1y1z_min-vina-std	146547210524	112718421298	113845801456353	1	150	0	1.5
198-1z95_min-autodock-ga	783197211699	112885929608	4996237255897	5	180	0	1.8
198-1z95_min-autodock-lga	735450139898	646756229726	36308356276513	9	180	0	1.8
198-1z95_min-autodock-ls	828002274901	298218744063	5561212760843	0	180	0	1.8
198-1z95_min-glide-sp	164298632094	399140980192	462281841095775	3	180	1	1.8
198-1z95_min-gold-asp	207810299129	328662532615	7413261682242	17	180	2	1.8
198-1z95_min-gold-chemscore	730146848244	374412353815	5249472288233	20	180	2	1.8
198-1z95_min-gold-goldscore ERR ERR ERR ERR 1.80 198-1z95_min-gold-goldscore ERR							0
198-1z95_min-gold-plp	208589983113	287345539317	481495073766	19	180	2	1.8
198-1z95_min-moe-AffinitydG	334041334671	167924366472	26112272451265	0	180	0	1.8
198-1z95_min-moe-GBVIWSA	321826328861	153226229725	25005668773885	0	180	0	1.8
198-1z95_min-moe-LondondG	353201918157	172587128471	27687247209015	0	180	0	1.8
198-1z95_min-plants-chemplp	432720666358	375793767268	14557383782882	12	180	2	1.8
198-1z95_min-plants-plp95	422940378642	294556288163	14928010152193	12	180	2	1.8
198-1z95_min-plants-plp	754448409417	316762301288	18913696002513	11	180	1	1.8
198-1z95_min-rdock-solv	770323978824	514608048706	27795187188948	9	180	0	1.8
198-1z95_min-rdock-std	751417366141	50896015324	25247859740147	9	180	0	1.8
198-1z95_min-vina-std	164104479377	627041933372	811173092565511	1	180	0	1.8
1AC-1y20_min-autodock-ga	894888878976	18428665559	23288726628664	15	140	1	1.4
1AC-1y20_min-autodock-lga	221156699456	768207561238	17152128062184	20	140	3	1.4
1AC-1y20_min-autodock-ls	857099235795	198622980975	3168957713231	0	140	0	1.4
1AC-1y20_min-glide-sp	152898053793	119492183725	118410585148095	2	140	0	1.4
1AC-1y20_min-gold-asp	124272140195	164099172976	87647755140595	20	140	2	1.4
1AC-1y20_min-gold-chemscore	122203013758	197886525925	35702583410945	20	140	2	1.4
1AC-1y20_min-gold-goldscore	124074763867	202736373507	10882700957936	20	140	2	1.4
1AC-1y20_min-gold-plp	123461450722	203832536307	111953117877495	20	140	2	1.4
1AC-1y20_min-moe-AffinitydG	288102639349	139406092253	21064053506	0	140	0	1.4
1AC-1y20_min-moe-GBVIWSA	279586149437	132889433311	2002230632645	0	140	0	1.4
1AC-1y20_min-moe-LondondG	258404889356	12945538851	22446168878155	0	140	0	1.4
1AC-1y20_min-plants-chemplp	117014297508	162626956999	164074620620225	14	140	1	1.4
1AC-1y20_min-plants-plp95	134126677795	209077504426	73346732977054	4	140	0	1.4
1AC-1y20_min-plants-plp	135092085407	158195688039	810702828177645	5	140	0	1.4
1AC-1y20_min-rdock-solv	121617737744	879195755555	9750895012838	0	140	0	1.4
1AC-1y20_min-rdock-std	120121298617	873785325556	104070255048445	0	140	0	1.4
1AC-1y20_min-vina-std	144462068674	162953542898	124125644515578	1	140	0	1.4
1AN-1lgw_min-autodock-ga	260237653405	140120457107	16031638886025	18	185	2	1.85
1AN-1lgw_min-autodock-lga	147029078757	14340905219	1447522809589	20	185	2	1.85
1AN-1lgw_min-autodock-ls	278471450512	112154536244	23835428583005	3	185	0	1.85
1AN-1lgw_min-glide-sp	334962569625	513581033042	2279221544292	2	185	0	1.85
1AN-1lgw_min-gold-asp	357137188976	231529193786	3252742569584	0	185	0	1.85
1AN-1lgw_min-gold-chemscore	643928384023	208269557905	3568995198005	20	185	3	1.85
1AN-1lgw_min-gold-goldscore	236416648525	232730560413	174951555599115	6	185	1	1.85
1AN-1lgw_min-gold-plp	498324738499	22857317756	3979147424045	20	185	2	1.85
1AN-1lgw_min-moe-AffinitydG	273257624573	110803220847	123842943697435	1	185	0	1.85
1AN-1lgw_min-moe-GBVIWSA	281436781445	147106615376	19182849168805	0	185	0	1.85
1AN-1lgw_min-moe-LondondG	271464318212	220373574868	148458985776825	0	185	0	1.85
1AN-1lgw_min-plants-chemplp	349689924076	493270897935	233613377069755	5	185	0	1.85
1AN-1lgw_min-plants-plp95	131443273336	639256630783	64035018344248	3	185	0	1.85
1AN-1lgw_min-plants-plp	350202499349	684602498717	23035175229963	5	185	0	1.85
1AN-1lgw_min-rdock-solv	345023818073	385860449191	18734570698606	12	185	1	1.85
1AN-1lgw_min-rdock-std	34696917545	164307104381	21451542560395	13	185	1	1.85
1AN-1lgw_min-vina-std	159275294655	62507549544	10680821954824	1	185	0	1.85
1DA-1add_min-autodock-ga	698123306105	557457527294	48153758418291	4	240	0	2.4
1DA-1add_min-autodock-lga	69246555301	6806366215	4691742713095	2	240	0	2.4
1DA-1add_min-autodock-ls	63088273412	583141839295	60930201431915	0	240	0	2.4
1DA-1add_min-glide-sp	656002739468	635950005069	38741553595097	3	240	0	2.4
1DA-1add_min-gold-asp	694753899961	243413618094	288839119767475	12	240	1	2.4
1DA-1add_min-gold-chemscore	990252880433	289619146694	68392848569685	0	240	0	2.4
1DA-1add_min-gold-goldscore	293282162144	375437888899	20674642816812	7	240	1	2.4
1DA-1add_min-gold-plp	629033221711	577478892273	6006686775497	0	240	0	2.4
1DA-1add_min-moe-AffinitydG	288872212688	182767507866	2374343691164	0	240	0	2.4
1DA-1add_min-moe-GBVIWSA	323041415798	941863426796	20657812842956	0	240	0	2.4
1DA-1add_min-moe-LondondG	287473624145	221150821363	220870045050265	1	240	0	2.4
1DA-1add_min-plants-chemplp	678208714417	538421007254	43831077709448	5	240	0	2.4
1DA-1add_min-plants-plp95	633851105885	327629213562	45470122553481	5	240	0	2.4
1DA-1add_min-plants-plp	888177548244	526219060848	54616341147334	3	240	0	2.4
1DA-1add_min-rdock-solv	621163259619	966817910794	50920945798332	2	240	0	2.4
1DA-1add_min-rdock-std	61326161578	43624417354	389234480642335	5	240	0	2.4
1DA-1add_min-vina-std	11368991725	55143034107	81258186187895	1	240	0	2.4
1DM-1pzi_min-autodock-ga	804685727474	261963397709	5649349905688	0	199	0	1.99
1DM-1pzi_min-autodock-lga	771071532801	366495128979	57117765172595	0	199	0	1.99
1DM-1pzi_min-autodock-ls	818402443789	377107352378	6094370577728	0	199	0	1.99
1DM-1pzi_min-glide-sp	690581857286	143475870263	3400938791294	7	199	0	1.99
1DM-1pzi_min-gold-asp	399144030727	148382673868	26639767176375	5	199	0	1.99
1DM-1pzi_min-gold-chemscore	463351695541	16619766975	2781827128409	3	199	0	1.99
1DM-1pzi_min-gold-goldscore	442563931353	922234869877	241799579665185	11	199	1	1.99
1DM-1pzi_min-gold-plp	289469116923	150777346615	25679832839825	3	199	0	1.99
1DM-1pzi_min-moe-AffinitydG	423294668307	501880919966	25537319865588	0	199	0	1.99
1DM-1pzi_min-moe-GBVIWSA	295622994392	215777583082	2802250769511	0	199	0	1.99
1DM-1pzi_min-moe-LondondG	310993009666	233883189732	2798695680099	0	199	0	1.99
1DM-1pzi_min-plants-chemplp	683105240472	169108598475	32432416192955	2	199	0	1.99
1DM-1pzi_min-plants-plp95	693428474914	1665121801	3754028017939	2	199	0	1.99
1DM-1pzi_min-plants-plp	678251428771	15812760722	32314311391035	4	199	0	1.99
1DM-1pzi_min-rdock-solv	709715868444	296164869148	5411494102072	0	199	0	1.99
1DM-1pzi_min-rdock-std	709423830706	479511450917	5734773184182	0	199	0	1.99
1DM-1pzi_min-vina-std	126164302727	182051879849	59469281496795	2	199	0	1.99
1NH-1o1s_min-autodock-ga ERR ERR ERR ERR 1.99 1NH-1o1s_min-autodock-ga ERR							0
1NH-1o1s_min-autodock-lga ERR ERR ERR ERR 1.99 1NH-1o1s_min-autodock-lga ERR							0
1NH-1o1s_min-autodock-ls ERR ERR ERR ERR 1.99 1NH-1o1s_min-autodock-ls ERR							0
1NH-1o1s_min-gold-asp ERR ERR ERR ERR 1.99 1NH-1o1s_min-gold-asp ERR							0
1NH-1o1s_min-gold-chemscore	984473963751	198137187762	54002423897655	1	230	0	2.3
1NH-1o1s_min-gold-goldscore	545336755561	228982761678	34580532422585	1	230	0	2.3
1NH-1o1s_min-gold-plp	950080184625	265722613716	56322025960735	0	230	0	2.3
1NH-1o1s_min-moe-AffinitydG	377640506518	444304466393	247721418254525	0	230	0	2.3
1NH-1o1s_min-moe-GBVIWSA	345564849448	851304611087	275941230031535	0	230	0	2.3
1NH-1o1s_min-moe-LondondG	351476062766	444304466393	148202188579665	0	230	0	2.3
1NH-1o1s_min-plants-chemplp	106021201222	292613211722	50570355547335	0	230	0	2.3
1NH-1o1s_min-plants-plp95	12489989058	326511975768	55092738643445	0	230	0	2.3
1NH-1o1s_min-plants-plp	919499967751	501168011101	62915609302885	0	230	0	2.3
1NH-1o1s_min-rdock-solv	129293651255	471369387527	90747498395695	0	230	0	2.3
1NH-1o1s_min-rdock-std	132236010302	54350385259	9435673840007	0	230	0	2.3
1NH-1o1s_min-vina-std ERR ERR ERR ERR 2.30 1NH-1o1s_min-vina-std ERR							0
1UN-1ohr_min-autodock-ga	870197235689	230869759821	5927506564054	0	210	0	2.1
1UN-1ohr_min-autodock-lga	901715354061	239226741294	5768619034305	0	210	0	2.1
1UN-1ohr_min-autodock-ls	600885961727	263110856389	49879839325725	0	210	0	2.1
1UN-1ohr_min-glide-sp	131528953367	104935469563	513111833979	7	210	0	2.1
1UN-1ohr_min-gold-asp	120166513114	147901950942	66624949605615	4	210	0	2.1
1UN-1ohr_min-gold-chemscore	945175749401	181658807617	63622641804885	1	210	0	2.1
1UN-1ohr_min-gold-goldscore	947182811378	199917470791	68786270743455	2	210	0	2.1
1UN-1ohr_min-gold-plp	945311529505	441904351076	611376075288895	3	210	0	2.1
1UN-1ohr_min-moe-AffinitydG	287621801599	924840302566	20685700448583	0	210	0	2.1
1UN-1ohr_min-moe-GBVIWSA	298566455216	924840302566	20440594674308	0	210	0	2.1
1UN-1ohr_min-moe-LondondG	13342260352	254276915488	91768129176975	0	210	0	2.1
1UN-1ohr_min-plants-chemplp	945359182778	366289716277	417699605697575	8	210	0	2.1
1UN-1ohr_min-plants-plp95	941793778721	602786012819	393759697189285	13	210	1	2.1
1UN-1ohr_min-plants-plp	948584266047	473292335402	29611437534638	12	210	1	2.1
1UN-1ohr_min-rdock-solv	977259989156	209954659075	7498999634078	1	210	0	2.1
1UN-1ohr_min-rdock-std	964538535232	723721868711	574738521810655	2	210	0	2.1
1UN-1ohr_min-vina-std	112737541695	280387187653	711814004600015	2	210	0	2.1
1Z7-1ppl_min-autodock-ga	108717937408	324335518884	78277487473275	0	170	0	1.7
1Z7-1ppl_min-autodock-lga	106265351888	286839747445	73239423808705	0	170	0	1.7
1Z7-1ppl_min-autodock-ls	103263845422	64823761039	9271506491158	0	170	0	1.7
1Z7-1ppl_min-glide-sp	133006009551	208227669002	98425579906875	0	170	0	1.7
1Z7-1ppl_min-gold-asp	137818107166	109197301096	102481203290745	1	170	0	1.7
1Z7-1ppl_min-gold-chemscore	118769793114	309780000369	93132365023215	0	170	0	1.7
1Z7-1ppl_min-gold-goldscore	108891978261	115107318465	5994841527066	4	170	0	1.7
1Z7-1ppl_min-gold-plp	11855697582	244618156633	9341189335959	0	170	0	1.7
1Z7-1ppl_min-moe-AffinitydG	34838409643	128135248143	2435034079837	0	170	0	1.7
1Z7-1ppl_min-moe-GBVIWSA	384881485448	128135248143	27409694136745	0	170	0	1.7
1Z7-1ppl_min-moe-LondondG	16790648926	930203517414	12591121759475	0	170	0	1.7
1Z7-1ppl_min-plants-chemplp	107403627708	545312076375	92546950259315	0	170	0	1.7
1Z7-1ppl_min-plants-plp95	108642507336	296921051748	7001625731148	0	170	0	1.7
1Z7-1ppl_min-plants-plp	669407257603	410030266217	5505726536892	0	170	0	1.7
1Z7-1ppl_min-rdock-solv	100692246546	540439367832	7473774557478	0	170	0	1.7
1Z7-1ppl_min-rdock-std	947173943873	509558469833	7020359044948	0	170	0	1.7
1Z7-1ppl_min-vina-std ERR ERR ERR ERR 1.70 1Z7-1ppl_min-vina-std ERR							0
1ZK-1ivp_min-autodock-ga	114747777712	411762453734	73708128844315	0	250	0	2.5
1ZK-1ivp_min-autodock-lga	112016413522	431732904523	70578202781695	0	250	0	2.5
1ZK-1ivp_min-autodock-ls	102631613914	552760102591	66549367740875	0	250	0	2.5
1ZK-1ivp_min-glide-sp	156347410111	827085339377	105095910100065	0	250	0	2.5
1ZK-1ivp_min-gold-asp	165300200063	121209127824	1422003807269	0	250	0	2.5
1ZK-1ivp_min-gold-chemscore	159309455442	29465212092	1236732002829	0	250	0	2.5
1ZK-1ivp_min-gold-goldscore	134266401235	255014068276	7918432724744	0	250	0	2.5
1ZK-1ivp_min-gold-plp	157377567308	402790204765	12026165196533	0	250	0	2.5
1ZK-1ivp_min-moe-AffinitydG	319332810788	154992412214	23771916749735	0	250	0	2.5
1ZK-1ivp_min-moe-GBVIWSA	321175036118	154992412214	2572444471355	0	250	0	2.5
1ZK-1ivp_min-moe-LondondG	306338707996	100479860272	1585986428115	0	250	0	2.5
1ZK-1ivp_min-plants-chemplp	124504917669	254845947218	8123245950746	0	250	0	2.5
1ZK-1ivp_min-plants-plp95	118073325399	277306039988	7285356307152	0	250	0	2.5
1ZK-1ivp_min-plants-plp	122027857607	476422717705	8999850659815	0	250	0	2.5
1ZK-1ivp_min-rdock-solv	127346930115	340043991391	7821727478524	0	250	0	2.5
1ZK-1ivp_min-rdock-std	12743058135	268486929082	70856304308585	0	250	0	2.5
1ZK-1ivp_min-vina-std	133123933553	160074383663	96777085783885	1	250	0	2.5
216-1hwr_min-autodock-ga	459060932049	117316972344	3323076214223	2	180	0	1.8
216-1hwr_min-autodock-lga	495873133641	628893737712	18363811636919	14	180	1	1.8
216-1hwr_min-autodock-ls	528260215866	384928529297	4883634746562	0	180	0	1.8
216-1hwr_min-glide-sp	712110918858	355244017759	459643468983125	0	180	0	1.8
216-1hwr_min-gold-asp	730213727389	38620297211	57574271939645	20	180	3	1.8
216-1hwr_min-gold-chemscore	876508355731	446215885718	69245460221975	20	180	2	1.8
216-1hwr_min-gold-goldscore	464029096986	377573863414	69722766649395	19	180	2	1.8
216-1hwr_min-gold-plp	812166465285	516983811803	7133740793734	20	180	2	1.8
216-1hwr_min-moe-AffinitydG	276406782508	430197632103	191644588046815	0	180	0	1.8
216-1hwr_min-moe-GBVIWSA	307034866603	124084316253	20436320941895	0	180	0	1.8
216-1hwr_min-moe-LondondG	760199685828	146934477461	44161910828	2	180	0	1.8
216-1hwr_min-plants-chemplp	471512118681	441566347978	198497666085965	14	180	1	1.8
216-1hwr_min-plants-plp95	461195157021	632514004588	147661604114435	17	180	2	1.8
216-1hwr_min-plants-plp	462727174045	628409656991	16220306386217	16	180	2	1.8
216-1hwr_min-rdock-solv	500526609146	367500268934	3213063802591	7	180	0	1.8
216-1hwr_min-rdock-std	484269965515	601132100845	18035943565007	15	180	1	1.8
216-1hwr_min-vina-std	998536467203	442420953392	583899751400885	3	180	0	1.8
239-1owh_min-autodock-ga	964670397727	856557450885	415121208744295	11	161	1	1.61
239-1owh_min-autodock-lga	96713805956	58232021546	31414439195006	14	161	1	1.61
239-1owh_min-autodock-ls	216075788209	128071005696	1704942969164	8	161	0	1.61
239-1owh_min-glide-sp	969296858634	755980727819	674369258148345	4	161	0	1.61
239-1owh_min-gold-asp	240206261931	561309499445	17918960300012	4	161	0	1.61
239-1owh_min-gold-chemscore	958981406858	119087962815	28513635828545	3	161	0	1.61
239-1owh_min-gold-goldscore	995991292218	766001027795	266478594839995	7	161	0	1.61
239-1owh_min-gold-plp	249619316777	451860812364	188118688068245	5	161	0	1.61
239-1owh_min-moe-AffinitydG	331677996086	267495390147	220730449916015	0	161	0	1.61
239-1owh_min-moe-GBVIWSA	331677996086	708527731756	23725004994616	0	161	0	1.61
239-1owh_min-moe-LondondG	276482818582	193005185595	10172669553548	0	161	0	1.61
239-1owh_min-plants-chemplp	311378143186	520796289349	227498187299575	4	161	0	1.61
239-1owh_min-plants-plp95	964316681268	876083556945	399617150185605	3	161	0	1.61
239-1owh_min-plants-plp	973814448978	556809121244	468244072290215	4	161	0	1.61
239-1owh_min-rdock-solv	106036578241	379332751574	6613170945015	0	161	0	1.61
239-1owh_min-rdock-std	105874273794	378588376087	7176409962465	0	161	0	1.61
239-1owh_min-vina-std	123789039566	888402569222	64216284808376	1	161	0	1.61
254-1fd0_min-autodock-ga	245552456718	548882501087	120068663205825	10	138	1	1.38
254-1fd0_min-autodock-lga	677257558097	257258430377	58392661714605	20	138	2	1.38
254-1fd0_min-autodock-ls	51085081025	326918280309	47908976664385	0	138	0	1.38
254-1fd0_min-glide-sp	692082544451	461130189498	5766063669745	2	138	0	1.38
254-1fd0_min-gold-asp	697575550986	24270170649	4760951429118	20	138	2	1.38
254-1fd0_min-gold-chemscore	768461158854	316124361605	561090336166	20	138	2	1.38
254-1fd0_min-gold-goldscore	654337513062	238012849093	397172294015	20	138	3	1.38
254-1fd0_min-gold-plp ERR ERR ERR ERR 1.38 254-1fd0_min-gold-plp ERR							0
254-1fd0_min-moe-AffinitydG	317267972535	268323624255	214424601200275	0	138	0	1.38
254-1fd0_min-moe-GBVIWSA	343661044223	168427050371	22705878268155	0	138	0	1.38
254-1fd0_min-moe-LondondG	217745006181	144294101289	115217520502585	0	138	0	1.38
254-1fd0_min-plants-chemplp	310431956683	237555614541	16831801043954	9	138	0	1.38
254-1fd0_min-plants-plp95	930838484624	604997174098	24371624837309	7	138	0	1.38
254-1fd0_min-plants-plp	930008143504	60681918971	22175468726132	7	138	0	1.38
254-1fd0_min-rdock-solv	108420089165	362568002817	22952915889794	14	138	1	1.38
254-1fd0_min-rdock-std	104814287248	353835702457	208930327211455	14	138	1	1.38
254-1fd0_min-vina-std	10312131254	594362151105	679822566916265	1	138	0	1.38
2GP-1det_min-autodock-ga	802673056886	176468127434	6313199486866	1	180	0	1.8
2GP-1det_min-autodock-lga	832344493985	131125282014	55779607479555	1	180	0	1.8
2GP-1det_min-autodock-ls	812483286238	122866967354	58869034476335	1	180	0	1.8
2GP-1det_min-glide-sp	504822304488	102066444106	28594791311255	11	180	0	1.8
2GP-1det_min-gold-asp	576505477023	503228953443	5413928962278	0	180	0	1.8
2GP-1det_min-gold-chemscore ERR ERR ERR ERR 1.80 2GP-1det_min-gold-chemscore ERR							0
2GP-1det_min-gold-goldscore	523031991867	485079998686	5031259416215	0	180	0	1.8
2GP-1det_min-gold-plp	572065214238	436131700999	54463591974635	0	180	0	1.8
2GP-1det_min-moe-AffinitydG	271371414639	534957241671	17987194741238	0	180	0	1.8
2GP-1det_min-moe-GBVIWSA	2490793367	407105826741	15353225828965	0	180	0	1.8
2GP-1det_min-moe-LondondG	821177155572	407105826741	55666259708335	0	180	0	1.8
2GP-1det_min-plants-chemplp	563785936216	866129368705	438441666330915	2	180	0	1.8
2GP-1det_min-plants-plp95	569947774687	318176438854	48401591768755	0	180	0	1.8
2GP-1det_min-plants-plp	632298928458	342253100522	52832779424285	0	180	0	1.8
2GP-1det_min-rdock-solv	628251503238	543319021582	59026873108965	0	180	0	1.8
2GP-1det_min-rdock-std	628045040052	542406313581	5964223073382	0	180	0	1.8
2GP-1det_min-vina-std	684241145053	391097811189	533972414511	0	180	0	1.8
2GP-1rnt_min-autodock-ga	847282763948	396762752368	6775858840893	0	190	0	1.9
2GP-1rnt_min-autodock-lga	885837546948	138103404798	6824960769717	1	190	0	1.9
2GP-1rnt_min-autodock-ls	843954009904	640439756795	76198907666485	0	190	0	1.9
2GP-1rnt_min-glide-sp	46116902984	994706616294	32117728740917	5	190	0	1.9
2GP-1rnt_min-gold-asp	39023774306	315501055631	33576232181685	0	190	0	1.9
2GP-1rnt_min-gold-chemscore	59757574652	89575199716	38920254203017	7	190	0	1.9
2GP-1rnt_min-gold-goldscore	132127908908	969676551313	113324945870815	20	190	3	1.9
2GP-1rnt_min-gold-plp	614508916463	8869577893	320536941644485	9	190	0	1.9
2GP-1rnt_min-moe-AffinitydG	245557599098	343423870142	9866191589604	0	190	0	1.9
2GP-1rnt_min-moe-GBVIWSA	247867728764	413152982159	117264939517885	0	190	0	1.9
2GP-1rnt_min-moe-LondondG	605624659959	151774911464	3883438635103	2	190	0	1.9
2GP-1rnt_min-plants-chemplp	401997695381	793814991303	240700505380915	9	190	0	1.9
2GP-1rnt_min-plants-plp95	430696740855	906189110368	275021200956895	7	190	0	1.9
2GP-1rnt_min-plants-plp	620531455804	896852787065	393868853022475	4	190	0	1.9
2GP-1rnt_min-rdock-solv ERR ERR ERR ERR 1.90 2GP-1rnt_min-rdock-solv ERR							0
2GP-1rnt_min-rdock-std ERR ERR ERR ERR 1.90 2GP-1rnt_min-rdock-std ERR							0
2GP-1rnt_min-vina-std	653582667559	888460864829	461671146771195	1	190	0	1.9
2Z3-1epo_min-autodock-ga	991454241528	533701851917	8015715017834	0	200	0	2
2Z3-1epo_min-autodock-lga	988833645833	441267193531	77467326773795	0	200	0	2
2Z3-1epo_min-autodock-ls	878920735161	523635061893	77357513104655	0	200	0	2
2Z3-1epo_min-glide-sp	106653083825	806649222563	74490522114749	4	200	0	2
2Z3-1epo_min-gold-asp	136830004901	549589982881	103577007029625	0	200	0	2
2Z3-1epo_min-gold-chemscore	123313158665	756413853761	1018111413733	0	200	0	2
2Z3-1epo_min-gold-goldscore	107171850801	124804374627	73281949731175	3	200	0	2
2Z3-1epo_min-gold-plp	130131070372	648671702852	104296588506205	0	200	0	2
2Z3-1epo_min-moe-AffinitydG	325988002147	762745376057	23752577142229	0	200	0	2
2Z3-1epo_min-moe-GBVIWSA	314239086687	126757942475	24315221688575	0	200	0	2
2Z3-1epo_min-moe-LondondG	286243933211	248810663003	26941964132145	0	200	0	2
2Z3-1epo_min-plants-chemplp	824552744474	141105391787	3782721311548	2	200	0	2
2Z3-1epo_min-plants-plp95	110918900898	282777010735	64023082029625	0	200	0	2
2Z3-1epo_min-plants-plp	126078679647	664943731653	9361280445007	0	200	0	2
2Z3-1epo_min-rdock-solv	111246792415	543801433234	7528719996347	0	200	0	2
2Z3-1epo_min-rdock-std	108474368802	532074641462	74613814987615	0	200	0	2
2Z3-1epo_min-vina-std	10673790019	133350752757	7470624498313	1	200	0	2
312-1o2z_min-autodock-ga	625326857389	434002415727	46605976898585	0	165	0	1.65
312-1o2z_min-autodock-lga	92931732194	439470883482	6578379929042	0	165	0	1.65
312-1o2z_min-autodock-ls	988598465939	538678171082	67327821621755	0	165	0	1.65
312-1o2z_min-glide-sp	133661135728	189350904121	85294005952085	0	165	0	1.65
312-1o2z_min-gold-asp	392532043758	542793298201	195272119035305	7	165	0	1.65
312-1o2z_min-gold-chemscore	292022845217	12227220517	256042264972	1	165	0	1.65
312-1o2z_min-gold-goldscore	792804279938	152451166148	3381757166356	4	165	0	1.65
312-1o2z_min-gold-plp	530571800726	113188612375	32514864000895	2	165	0	1.65
312-1o2z_min-moe-AffinitydG	302271520605	838760143136	172545737177965	0	165	0	1.65
312-1o2z_min-moe-GBVIWSA	344631042267	642357278868	1983356006359	0	165	0	1.65
312-1o2z_min-moe-LondondG	305096310686	38557236045	142911298205415	0	165	0	1.65
312-1o2z_min-plants-chemplp	27644496236	119753068842	2123448103885	3	165	0	1.65
312-1o2z_min-plants-plp95	508679057442	175753299575	3566055676759	0	165	0	1.65
312-1o2z_min-plants-plp	994185864057	118933307566	2872557119986	4	165	0	1.65
312-1o2z_min-rdock-solv	103105998471	395638475148	83517996591445	0	165	0	1.65
312-1o2z_min-rdock-std	103653122954	287616110968	8528371197612	0	165	0	1.65
312-1o2z_min-vina-std	107177780773	509511951353	768608645068965	1	165	0	1.65
326-1thz_min-autodock-ga	616806437886	383774910355	49380670540815	20	180	3	1.8
326-1thz_min-autodock-lga	545120392596	527744141406	5376677162155	20	180	2	1.8
326-1thz_min-autodock-ls	104744839187	444988278021	8476675210862	0	180	0	1.8
326-1thz_min-glide-sp	13705357747	352911678061	1058819286453	0	180	0	1.8
326-1thz_min-gold-asp	114610173772	595595377727	99761676713635	0	180	0	1.8
326-1thz_min-gold-chemscore	102908635577	44058730782	9353014905286	0	180	0	1.8
326-1thz_min-gold-goldscore	115190730856	127035450624	94152544225045	1	180	0	1.8
326-1thz_min-gold-plp	105334904521	159998104885	80276385432795	1	180	0	1.8
326-1thz_min-moe-AffinitydG	391319155232	880952443769	229545803204545	0	180	0	1.8
326-1thz_min-moe-GBVIWSA	413347617388	781842551576	259078369063925	0	180	0	1.8
326-1thz_min-moe-LondondG	294433441226	113128639195	18268419862995	0	180	0	1.8
326-1thz_min-plants-chemplp	106596328667	576961232753	9694591748706	0	180	0	1.8
326-1thz_min-plants-plp95	113873556861	831773431716	100940439740855	0	180	0	1.8
326-1thz_min-plants-plp	108541907076	832938837605	9933658336917	0	180	0	1.8
326-1thz_min-rdock-solv	113724076314	471512039966	92976818301445	0	180	0	1.8
326-1thz_min-rdock-std	115580016555	503292434686	8521948711415	0	180	0	1.8
326-1thz_min-vina-std	124961251715	255252578416	81567197513983	1	180	0	1.8
334-1o3j_min-autodock-ga	765879832051	886991759236	503636966096685	2	140	0	1.4
334-1o3j_min-autodock-lga	227523833393	865900659649	16408932587294	6	140	0	1.4
334-1o3j_min-autodock-ls	761324127519	538388264483	7293855680657	0	140	0	1.4
334-1o3j_min-glide-sp	13436107047	236611375003	93594881527795	0	140	0	1.4
334-1o3j_min-gold-asp ERR ERR ERR ERR 1.40 334-1o3j_min-gold-asp ERR							0
334-1o3j_min-gold-chemscore ERR ERR ERR ERR 1.40 334-1o3j_min-gold-chemscore ERR							0
334-1o3j_min-gold-goldscore	251652265873	133352888197	2199788236822	1	140	0	1.4
334-1o3j_min-gold-plp	23518015193	221708024566	22819295387595	0	140	0	1.4
334-1o3j_min-moe-AffinitydG	265374759054	325820988683	144616057030145	0	140	0	1.4
334-1o3j_min-moe-GBVIWSA	335434296952	797357473755	191858892902215	0	140	0	1.4
334-1o3j_min-moe-LondondG	264637191507	411368783685	170139213818475	0	140	0	1.4
334-1o3j_min-plants-chemplp	267266063092	4224173771	18940482334529	4	140	0	1.4
334-1o3j_min-plants-plp95	477595258397	794188460901	215241514683855	2	140	0	1.4
334-1o3j_min-plants-plp	110638802005	807293980206	334704810411715	2	140	0	1.4
334-1o3j_min-rdock-solv	786557034916	119757473691	4237974787787	1	140	0	1.4
334-1o3j_min-rdock-std	788142953316	98037575668	372126933411925	2	140	0	1.4
334-1o3j_min-vina-std	112969931545	827341381719	584280044655445	1	140	0	1.4
382-1zgi_min-autodock-ga	82310261454	386875890144	69136652917795	0	220	0	2.2
382-1zgi_min-autodock-lga	81595782175	613372490824	487803567786095	5	220	0	2.2
382-1zgi_min-autodock-ls	858350433062	353528522541	68839323569475	0	220	0	2.2
382-1zgi_min-glide-sp	863701717851	294467895374	7811038390406	0	220	0	2.2
382-1zgi_min-gold-asp	941700109194	19684888268	72450328810115	1	220	0	2.2
382-1zgi_min-gold-chemscore	120819835368	860980466169	693241084202295	2	220	0	2.2
382-1zgi_min-gold-goldscore	854097199248	983607854089	388929955038595	7	220	0	2.2
382-1zgi_min-gold-plp	879307339206	682355063823	550852546133285	5	220	0	2.2
382-1zgi_min-moe-AffinitydG	352934123315	506125879229	18937147175019	0	220	0	2.2
382-1zgi_min-moe-GBVIWSA	298567320314	956974307551	221971307707905	0	220	0	2.2
382-1zgi_min-moe-LondondG	342194137662	114138918661	2276007110511	0	220	0	2.2
382-1zgi_min-plants-chemplp	787930049283	601821863438	552475880722705	3	220	0	2.2
382-1zgi_min-plants-plp95	81316159526	173615618051	5108620894645	1	220	0	2.2
382-1zgi_min-plants-plp	801096525235	567212707291	49491992144455	5	220	0	2.2
382-1zgi_min-rdock-solv	100940771966	199229576588	61433978242065	1	220	0	2.2
382-1zgi_min-rdock-std	985876731199	170024406171	5933493610641	3	220	0	2.2
382-1zgi_min-vina-std	880468647582	512271930961	503640280951505	1	220	0	2.2
3CH-1li3_min-autodock-ga	380635851241	39882311242	15515158707018	9	185	1	1.85
3CH-1li3_min-autodock-lga	219482786911	105031763053	19640743329525	4	185	0	1.85
3CH-1li3_min-autodock-ls	369944810073	116704568248	23084960889585	6	185	0	1.85
3CH-1li3_min-glide-sp	365999229456	319808939056	22923948304181	4	185	0	1.85
3CH-1li3_min-gold-asp	370861662062	361976730951	25161951833415	6	185	0	1.85
3CH-1li3_min-gold-chemscore	731923672592	513964023546	6157914836651	20	185	3	1.85
3CH-1li3_min-gold-goldscore	340647581655	591428024995	216954250116985	6	185	0	1.85
3CH-1li3_min-gold-plp	315887366537	550004404528	13857219565283	12	185	2	1.85
3CH-1li3_min-moe-AffinitydG	225620489179	446348098461	956886525323075	2	185	0	1.85
3CH-1li3_min-moe-GBVIWSA	185000008345	446348098461	135723983417203	2	185	0	1.85
3CH-1li3_min-moe-LondondG	270077192924	446348098461	664662316706175	2	185	0	1.85
3CH-1li3_min-plants-chemplp	387766349317	606919819663	255327433091575	4	185	0	1.85
3CH-1li3_min-plants-plp95	126991500988	898960735377	516417913272485	2	185	0	1.85
3CH-1li3_min-plants-plp	386883874292	839033750066	26917943880733	3	185	0	1.85
3CH-1li3_min-rdock-solv	126553839423	114509021296	1176461024911	0	185	0	1.85
3CH-1li3_min-rdock-std	122205090663	11330773837	1185001139402	0	185	0	1.85
3CH-1li3_min-vina-std	173423438511	565473805759	104965404276419	1	185	0	1.85
3HA-1u1w_min-autodock-ga ERR ERR ERR ERR 1.85 3HA-1u1w_min-autodock-ga ERR							0
3HA-1u1w_min-autodock-lga ERR ERR ERR ERR 1.85 3HA-1u1w_min-autodock-lga ERR							0
3HA-1u1w_min-autodock-ls ERR ERR ERR ERR 1.85 3HA-1u1w_min-autodock-ls ERR							0
3HA-1u1w_min-glide-sp	176569291643	212045751924	71888322144829	3	135	0	1.35
3HA-1u1w_min-gold-asp	101751904695	123062120307	60036974538825	20	135	2	1.35
3HA-1u1w_min-gold-chemscore	100093416276	111334794039	5417488260071	20	135	3	1.35
3HA-1u1w_min-gold-goldscore	10419589444	384036413993	6222720613184	20	135	2	1.35
3HA-1u1w_min-gold-plp	100409040384	213884847948	57463676826795	20	135	2	1.35
3HA-1u1w_min-moe-AffinitydG	297688185065	131177739104	190254115484	0	135	0	1.35
3HA-1u1w_min-moe-GBVIWSA	297688185065	132897521422	1983024276455	0	135	0	1.35
3HA-1u1w_min-moe-LondondG	271055330631	414246039099	173256193876245	0	135	0	1.35
3HA-1u1w_min-plants-chemplp	433909048293	276277586035	282284893058785	4	135	0	1.35
3HA-1u1w_min-plants-plp95	425051667287	23735805902	26314587186175	6	135	0	1.35
3HA-1u1w_min-plants-plp	109150047487	183212348234	38416441602974	4	135	0	1.35
3HA-1u1w_min-rdock-solv	112701833499	968027934876	10532720367218	0	135	0	1.35
3HA-1u1w_min-rdock-std	122218109887	946969515493	105121235308925	0	135	0	1.35
3HA-1u1w_min-vina-std ERR ERR ERR ERR 1.35 3HA-1u1w_min-vina-std ERR							0
3OL-1g85_min-autodock-ga	49349516715	196676895214	3575892322624	0	180	0	1.8
3OL-1g85_min-autodock-lga	4848648059	268994169701	3435946791527	0	180	0	1.8
3OL-1g85_min-autodock-ls	456583068991	300976412882	3762211329131	0	180	0	1.8
3OL-1g85_min-glide-sp	528811281366	219191580891	45433246659495	0	180	0	1.8
3OL-1g85_min-gold-asp	466896987223	166229703891	2596619488048	7	180	0	1.8
3OL-1g85_min-gold-chemscore	500215144235	452094787369	47523998833305	0	180	0	1.8
3OL-1g85_min-gold-goldscore	541318055183	170515984816	35343529741925	2	180	0	1.8
3OL-1g85_min-gold-plp	52034606019	207995306464	33898634854475	0	180	0	1.8
3OL-1g85_min-moe-AffinitydG	351242825613	195666808631	299246800793485	0	180	0	1.8
3OL-1g85_min-moe-GBVIWSA	357119038744	195666808631	218641192436635	0	180	0	1.8
3OL-1g85_min-moe-LondondG	286621558583	504411184782	17909572158876	0	180	0	1.8
3OL-1g85_min-plants-chemplp	527624259298	203048526794	3831685239835	0	180	0	1.8
3OL-1g85_min-plants-plp95	536608866121	278702124359	44053527277975	0	180	0	1.8
3OL-1g85_min-plants-plp	527909718691	368873668076	45777721816515	0	180	0	1.8
3OL-1g85_min-rdock-solv	589221741122	229453591241	45429886896815	0	180	0	1.8
3OL-1g85_min-rdock-std	624304823037	176023752185	4500695662719	1	180	0	1.8
3OL-1g85_min-vina-std	126995841927	194672628333	4031113696156	0	180	0	1.8
3PG-1iih_min-autodock-ga ERR ERR ERR ERR 1.80 3PG-1iih_min-autodock-ga ERR							0
3PG-1iih_min-autodock-lga ERR ERR ERR ERR 1.80 3PG-1iih_min-autodock-lga ERR							0
3PG-1iih_min-autodock-ls ERR ERR ERR ERR 1.80 3PG-1iih_min-autodock-ls ERR							0
3PG-1iih_min-glide-sp	472085646804	875466159981	194045072826385	16	220	0	2.2
3PG-1iih_min-gold-asp	203717497932	882646811893	137046012795205	20	220	3	2.2
3PG-1iih_min-gold-chemscore	179608036872	110839070647	14876948441235	20	220	2	2.2
3PG-1iih_min-gold-goldscore ERR ERR ERR ERR 2.20 3PG-1iih_min-gold-goldscore ERR							0
3PG-1iih_min-gold-plp	470377532144	704984845743	178317938921365	17	220	2	2.2
3PG-1iih_min-moe-AffinitydG	296632229552	159750448626	24333893378685	0	220	0	2.2
3PG-1iih_min-moe-GBVIWSA	344612977516	503621675286	20783372880147	0	220	0	2.2
3PG-1iih_min-moe-LondondG	296632229552	408382588	15309648949219	0	220	0	2.2
3PG-1iih_min-plants-chemplp	463930643161	100438052188	30325130628615	10	220	0	2.2
3PG-1iih_min-plants-plp95	479929887038	143112105834	2801750707667	13	220	1	2.2
3PG-1iih_min-plants-plp	462538117712	124481041419	2496623943697	14	220	1	2.2
3PG-1iih_min-rdock-solv	439424316226	130495683732	1814263956983	19	220	2	2.2
3PG-1iih_min-rdock-std	470926905098	147840050515	27204879343495	11	220	1	2.2
3PG-1iih_min-vina-std ERR ERR ERR ERR 2.20 3PG-1iih_min-vina-std ERR							0
429-1qxk_min-autodock-ga	103983613665	414296882388	78842441368465	0	230	0	2.3
429-1qxk_min-autodock-lga	102496344668	295606637822	749038962704	0	230	0	2.3
429-1qxk_min-autodock-ls	105439443732	527313352915	73291075832425	0	230	0	2.3
429-1qxk_min-glide-sp	11253494867	918859807838	106762587604755	0	230	0	2.3
429-1qxk_min-gold-asp	108415462057	10855961105	72796704982745	3	230	0	2.3
429-1qxk_min-gold-chemscore	112398550108	210436365871	73986713212165	1	230	0	2.3
429-1qxk_min-gold-goldscore	862476179499	117665518118	440551532694	3	230	0	2.3
429-1qxk_min-gold-plp ERR ERR ERR ERR 2.30 429-1qxk_min-gold-plp ERR							0
429-1qxk_min-moe-AffinitydG	344190374632	182360176426	2857142097511	0	230	0	2.3
429-1qxk_min-moe-GBVIWSA	434472446021	148163099757	28589423238045	0	230	0	2.3
429-1qxk_min-moe-LondondG	38371649837	10179645957	30982114443475	0	230	0	2.3
429-1qxk_min-plants-chemplp	105094782594	615143149356	8119724244233	0	230	0	2.3
429-1qxk_min-plants-plp95	1080488811	222231202458	58662900296855	1	230	0	2.3
429-1qxk_min-plants-plp	101182678436	342278990236	80718904432585	0	230	0	2.3
429-1qxk_min-rdock-solv	117272856554	269106625688	92769997937505	0	230	0	2.3
429-1qxk_min-rdock-std	118600636166	303656046313	8711232752693	0	230	0	2.3
429-1qxk_min-vina-std	110844892311	992697485288	64954039091519	4	230	0	2.3
43P-1yc4_min-autodock-ga	690070346052	119852313286	4700246408592	1	181	0	1.81
43P-1yc4_min-autodock-lga	710629801655	518460316707	274496080665455	10	181	0	1.81
43P-1yc4_min-autodock-ls	717107310659	30310384854	53679854049095	0	181	0	1.81
43P-1yc4_min-glide-sp	73811097841	6694850902	34558554539607	8	181	0	1.81
43P-1yc4_min-gold-asp	787872324784	510275343094	5634829727615	0	181	0	1.81
43P-1yc4_min-gold-chemscore	734834773793	440026891224	216101495333075	14	181	1	1.81
43P-1yc4_min-gold-goldscore	578401147527	357589934142	106651381399445	19	181	3	1.81
43P-1yc4_min-gold-plp	740638752436	440088739915	354046376414795	8	181	0	1.81
43P-1yc4_min-moe-AffinitydG	21895667761	14284085375	93720036365975	2	181	0	1.81
43P-1yc4_min-moe-GBVIWSA	278138153927	600717980836	19492614814673	0	181	0	1.81
43P-1yc4_min-moe-LondondG	144750213022	14284085375	7161049056399	1	181	0	1.81
43P-1yc4_min-plants-chemplp	564814522228	607141078745	31098726231979	8	181	0	1.81
43P-1yc4_min-plants-plp95	104089834072	82460644704	452278985479755	5	181	0	1.81
43P-1yc4_min-plants-plp	664560500989	658998274656	327914479891615	8	181	0	1.81
43P-1yc4_min-rdock-solv	866376535382	709248875219	39482562206614	10	181	0	1.81
43P-1yc4_min-rdock-std	800214772099	535857791303	47487648714511	6	181	0	1.81
43P-1yc4_min-vina-std	780175333499	850683695624	47856740434592	1	181	0	1.81
478-1hpv_min-autodock-ga	894842374308	207599375171	6419618865248	0	190	0	1.9
478-1hpv_min-autodock-lga	913324279604	253981033038	5985237295111	0	190	0	1.9
478-1hpv_min-autodock-ls	845608725796	610369804767	68699688047965	0	190	0	1.9
478-1hpv_min-glide-sp	129656656221	155951111259	61034240500525	1	190	0	1.9
478-1hpv_min-gold-asp ERR ERR ERR ERR 1.90 478-1hpv_min-gold-asp ERR							0
478-1hpv_min-gold-chemscore	100340081305	961642627561	767357185284455	2	190	0	1.9
478-1hpv_min-gold-goldscore	95567036941	124339696672	71578129226045	2	190	0	1.9
478-1hpv_min-gold-plp	101533247755	104866968802	65313363374715	4	190	0	1.9
478-1hpv_min-moe-AffinitydG	286944551871	135328829839	221160462534	0	190	0	1.9
478-1hpv_min-moe-GBVIWSA	310957446956	167629760229	2385031977928	0	190	0	1.9
478-1hpv_min-moe-LondondG	113015327633	276315929948	7112068143969	0	190	0	1.9
478-1hpv_min-plants-chemplp	836254344347	143545383993	48819771517685	1	190	0	1.9
478-1hpv_min-plants-plp95	932297843628	377370508633	57766223627215	0	190	0	1.9
478-1hpv_min-plants-plp	837004770772	168670988597	4462554100111	2	190	0	1.9
478-1hpv_min-rdock-solv	979068533018	156811692694	68237325336975	1	190	0	1.9
478-1hpv_min-rdock-std	951437666582	166287683849	5362481231742	2	190	0	1.9
478-1hpv_min-vina-std	961046593192	113767310143	60579144490895	3	190	0	1.9
478-1t7j_min-autodock-ga	859901155781	217987569108	5760800184222	1	220	0	2.2
478-1t7j_min-autodock-lga	944769403158	304079527662	70490319414365	0	220	0	2.2
478-1t7j_min-autodock-ls	834884769295	328808940181	6560952358182	0	220	0	2.2
478-1t7j_min-glide-sp	944402681705	156834178454	71616767213615	1	220	0	2.2
478-1t7j_min-gold-asp	127856747355	121049667681	58672586236045	3	220	0	2.2
478-1t7j_min-gold-chemscore	96853683368	129674617408	59456469255145	1	220	0	2.2
478-1t7j_min-gold-goldscore	982533064848	107079966834	51507410681175	3	220	0	2.2
478-1t7j_min-gold-plp	984111286959	121705009358	497238835002	4	220	0	2.2
478-1t7j_min-moe-AffinitydG	315189292218	126508836145	21623210881485	0	220	0	2.2
478-1t7j_min-moe-GBVIWSA	315189292218	153122185516	2260855803441	0	220	0	2.2
478-1t7j_min-moe-LondondG	146406233581	233250525034	78009230762775	0	220	0	2.2
478-1t7j_min-plants-chemplp	891167169386	39120255188	78415963637395	0	220	0	2.2
478-1t7j_min-plants-plp95	917825297124	212544726802	4797909764931	2	220	0	2.2
478-1t7j_min-plants-plp	830423904788	198212449328	57736889814405	1	220	0	2.2
478-1t7j_min-rdock-solv	985577017033	23808134776	634895399875	0	220	0	2.2
478-1t7j_min-rdock-std	981352637711	26737773903	6817854419597	0	220	0	2.2
478-1t7j_min-vina-std	90873538094	995892464074	52935015867972	1	220	0	2.2
486-1nhz_min-autodock-ga	702408857522	601241246818	6148167018904	0	230	0	2.3
486-1nhz_min-autodock-lga	605097780321	603284393964	6042694582875	0	230	0	2.3
486-1nhz_min-autodock-ls	799855277144	560142435011	71305608184305	0	230	0	2.3
486-1nhz_min-gold-asp	638632456027	362048995303	787950138581	19	230	2	2.3
486-1nhz_min-gold-chemscore	698263439369	428921481378	101929247445595	19	230	2	2.3
486-1nhz_min-gold-goldscore	67408401716	304256810729	10481961152901	18	230	2	2.3
486-1nhz_min-gold-plp	627545605111	342491220234	6975873314363	19	230	3	2.3
486-1nhz_min-moe-AffinitydG	213553518951	291333831283	15241173555508	0	230	0	2.3
486-1nhz_min-moe-GBVIWSA	346789874992	167063283378	257278802449	0	230	0	2.3
486-1nhz_min-moe-LondondG	153329223864	188026192491	9575510127206	1	230	0	2.3
486-1nhz_min-plants-chemplp	119614448396	402431852927	536451671918445	8	230	0	2.3
486-1nhz_min-plants-plp95	808136094868	383012159565	41554350273934	9	230	0	2.3
486-1nhz_min-plants-plp	120390641137	381314606821	48552469809068	10	230	0	2.3
486-1nhz_min-rdock-solv	682765113543	426739206439	238297333428965	14	230	1	2.3
486-1nhz_min-rdock-std	75589281161	477120886804	242305578386595	14	230	1	2.3
486-1nhz_min-vina-std	142797553638	605477812352	99401217716521	0	230	0	2.3
49A-1f8e_min-autodock-ga	787902620252	15097262997	50524052915775	0	140	0	1.4
49A-1f8e_min-autodock-lga	871558580074	1385314116	68135193955035	1	140	0	1.4
49A-1f8e_min-autodock-ls	848086061671	201780125384	45172034552515	0	140	0	1.4
49A-1f8e_min-glide-sp	443323209549	517588627193	195733220419055	8	140	0	1.4
49A-1f8e_min-gold-asp	164255458265	261220263379	63775192509835	19	140	2	1.4
49A-1f8e_min-gold-chemscore	138865014889	302734784919	65473868952645	20	140	2	1.4
49A-1f8e_min-gold-goldscore	104937402245	623567354822	8823995606008	20	140	2	1.4
49A-1f8e_min-gold-plp	89755307921	398443665403	60302110325675	20	140	3	1.4
49A-1f8e_min-moe-AffinitydG	329172423146	460199269339	24953841168092	0	140	0	1.4
49A-1f8e_min-moe-GBVIWSA	359677249642	400515962853	25798204568965	0	140	0	1.4
49A-1f8e_min-moe-LondondG	329018462886	4354334932	188388983049125	0	140	0	1.4
49A-1f8e_min-plants-chemplp	170693960907	259910883766	11314391936084	13	140	2	1.4
49A-1f8e_min-plants-plp95	119497966731	370254675865	796313611722325	1	140	0	1.4
49A-1f8e_min-plants-plp	117423379293	689676711583	64047230768455	4	140	0	1.4
49A-1f8e_min-rdock-solv	629489700631	1251996747	4466679835317	1	140	0	1.4
49A-1f8e_min-rdock-std	630855945977	170313332787	4272840838656	0	140	0	1.4
49A-1f8e_min-vina-std	669109225015	519005250455	476232126769125	1	140	0	1.4
4AM-1f8c_min-autodock-ga	799611160502	195453126094	5400752425785	0	170	0	1.7
4AM-1f8c_min-autodock-lga	913113823409	144119925756	5338730098143	3	170	0	1.7
4AM-1f8c_min-autodock-ls	848186222772	639833233741	7419105001255	0	170	0	1.7
4AM-1f8c_min-glide-sp	16003568274	39040596435	84568612358865	20	170	2	1.7
4AM-1f8c_min-gold-asp ERR ERR ERR ERR 1.70 4AM-1f8c_min-gold-asp ERR							0
4AM-1f8c_min-gold-chemscore	927321309202	3688906281	65502729870845	20	170	3	1.7
4AM-1f8c_min-gold-goldscore	130115614647	609324003302	9312596422266	20	170	2	1.7
4AM-1f8c_min-gold-plp	845576624263	377007730027	66841255418445	20	170	2	1.7
4AM-1f8c_min-moe-AffinitydG	349726191355	150753544303	26274056629325	0	170	0	1.7
4AM-1f8c_min-moe-GBVIWSA	36257570295	225337704346	24283350529563	0	170	0	1.7
4AM-1f8c_min-moe-LondondG	326850387563	218093750484	7282778186785	0	170	0	1.7
4AM-1f8c_min-plants-chemplp	253245122697	327880273118	128909435346445	14	170	2	1.7
4AM-1f8c_min-plants-plp95	122905965722	42286867556	88017160720705	0	170	0	1.7
4AM-1f8c_min-plants-plp	117165912764	446177392973	44864426470096	4	170	0	1.7
4AM-1f8c_min-rdock-solv	617041629637	157583833213	43740763450515	2	170	0	1.7
4AM-1f8c_min-rdock-std	628424002155	107266953392	44730157449045	2	170	0	1.7
4AM-1f8c_min-vina-std	653912746855	638613967902	46090638964531	1	170	0	1.7
4AX-1pb9_min-autodock-ga	924623094641	38073481585	416375085228565	11	160	1	1.6
4AX-1pb9_min-autodock-lga	596503981546	364701443454	50528653799015	20	160	2	1.6
4AX-1pb9_min-autodock-ls	316692110507	289837557953	30393931411115	0	160	0	1.6
4AX-1pb9_min-glide-sp	159721957292	342693142622	122644108216931	1	160	0	1.6
4AX-1pb9_min-gold-asp	387989215609	173107621356	2640560857936	20	160	2	1.6
4AX-1pb9_min-gold-chemscore	566947421346	197077356096	2892699995466	20	160	2	1.6
4AX-1pb9_min-gold-goldscore	600700040429	450691676363	5290694260414	20	160	2	1.6
4AX-1pb9_min-gold-plp	210185312794	159793902977	1926526644935	20	160	3	1.6
4AX-1pb9_min-moe-AffinitydG	247665747762	167904851712	2109101703701	0	160	0	1.6
4AX-1pb9_min-moe-GBVIWSA	247665747762	167844822551	20945284416735	0	160	0	1.6
4AX-1pb9_min-moe-LondondG	243914240081	101128562872	186778420891	0	160	0	1.6
4AX-1pb9_min-plants-chemplp	122579058555	180072005439	6275927154648	5	160	0	1.6
4AX-1pb9_min-plants-plp95	138826200937	187931241226	82753341683378	2	160	0	1.6
4AX-1pb9_min-plants-plp	139507291574	275797228827	929758645356885	2	160	0	1.6
4AX-1pb9_min-rdock-solv	116682117649	866371384511	8915681603647	0	160	0	1.6
4AX-1pb9_min-rdock-std	119005438804	866105850443	9064376825349	0	160	0	1.6
4AX-1pb9_min-vina-std	141067797935	152512294586	111211239933288	1	160	0	1.6
4BC-1yc1_min-autodock-ga	772601932865	126936394104	485369034768	1	170	0	1.7
4BC-1yc1_min-autodock-lga	642834152622	158901411317	48541578101705	4	170	0	1.7
4BC-1yc1_min-autodock-ls	797393669215	435028414994	6006742625287	0	170	0	1.7
4BC-1yc1_min-glide-sp	549462412006	729023681981	187316042154415	17	170	0	1.7
4BC-1yc1_min-gold-asp	603363871557	695865973686	212070551118495	13	170	1	1.7
4BC-1yc1_min-gold-chemscore	540208020632	472262200399	133338208959725	19	170	3	1.7
4BC-1yc1_min-gold-goldscore	801083919895	607278524176	236030100321975	14	170	1	1.7
4BC-1yc1_min-gold-plp	605145928911	717692436705	25222981050551	13	170	1	1.7
4BC-1yc1_min-moe-AffinitydG	281374033187	342585972449	175722777049505	0	170	0	1.7
4BC-1yc1_min-moe-GBVIWSA	293410099639	836460584181	19992588473331	0	170	0	1.7
4BC-1yc1_min-moe-LondondG	832608985637	490662409024	63904119475265	0	170	0	1.7
4BC-1yc1_min-plants-chemplp	829550825159	805735165341	283208803095915	7	170	0	1.7
4BC-1yc1_min-plants-plp95	836803808818	636294086154	34283010562977	9	170	0	1.7
4BC-1yc1_min-plants-plp	84253457322	896652120493	340841715677365	9	170	0	1.7
4BC-1yc1_min-rdock-solv	669378775751	462244428378	5438315667637	0	170	0	1.7
4BC-1yc1_min-rdock-std	64478139819	287296975452	5499005447893	0	170	0	1.7
4BC-1yc1_min-vina-std	729389113752	759311627824	55566337512512	1	170	0	1.7
4CM-1tx7_min-autodock-ga	69379008907	345734687074	4135600510844	0	175	0	1.75
4CM-1tx7_min-autodock-lga	345891689361	345721303943	3457986261476	0	175	0	1.75
4CM-1tx7_min-autodock-ls	372140314728	356869253153	3647231654821	0	175	0	1.75
4CM-1tx7_min-gold-asp	139608786973	290771311144	8291272814557	20	175	2	1.75
4CM-1tx7_min-gold-chemscore	107933116362	246834009937	539714184176	20	175	3	1.75
4CM-1tx7_min-gold-goldscore	110411764458	552287161928	8266571971754	20	175	2	1.75
4CM-1tx7_min-gold-plp	137002380187	196445498412	57134056133005	20	175	2	1.75
4CM-1tx7_min-moe-AffinitydG	239402377245	145130914376	935312453764	2	175	0	1.75
4CM-1tx7_min-moe-GBVIWSA	32260684725	145130914376	159595812937605	1	175	0	1.75
4CM-1tx7_min-moe-LondondG	307520881743	11217291254	113222859078675	5	175	0	1.75
4CM-1tx7_min-plants-chemplp	180477342239	307061673835	12214409018838	19	175	2	1.75
4CM-1tx7_min-plants-plp95	303845391479	308930044359	170049474174325	13	175	2	1.75
4CM-1tx7_min-plants-plp	268187563398	284783774927	14175992183737	15	175	2	1.75
4CM-1tx7_min-rdock-solv	189849718543	356604645338	109639054932045	18	175	2	1.75
4CM-1tx7_min-rdock-std	336547351943	381566227743	10782488916544	18	175	2	1.75
4CM-1tx7_min-vina-std	139013582513	345862636139	76147243629525	0	175	0	1.75
4IP-1b55_min-autodock-ga ERR ERR ERR ERR 1.75 4IP-1b55_min-autodock-ga ERR							0
4IP-1b55_min-autodock-lga ERR ERR ERR ERR 1.75 4IP-1b55_min-autodock-lga ERR							0
4IP-1b55_min-autodock-ls ERR ERR ERR ERR 1.75 4IP-1b55_min-autodock-ls ERR							0
4IP-1b55_min-glide-sp	588562687637	14029123052	403894102686455	4	240	0	2.4
4IP-1b55_min-gold-asp	604769393048	126821925803	4333783566224	4	240	0	2.4
4IP-1b55_min-gold-chemscore	680320653836	169332998092	5862787307881	1	240	0	2.4
4IP-1b55_min-gold-goldscore	193226395306	115483618937	14123810535405	20	240	2	2.4
4IP-1b55_min-gold-plp	684961273407	127116740271	5144379113075	2	240	0	2.4
4IP-1b55_min-moe-AffinitydG	326395217719	35328261552	149665331358095	0	240	0	2.4
4IP-1b55_min-moe-GBVIWSA	320028669212	427870439335	228461221088395	0	240	0	2.4
4IP-1b55_min-moe-LondondG	191482092234	288324417355	6770649825796	0	240	0	2.4
4IP-1b55_min-plants-chemplp	603208045175	488208696388	54787155602125	0	240	0	2.4
4IP-1b55_min-plants-plp95	145773659964	933366454025	126466643071915	20	240	3	2.4
4IP-1b55_min-plants-plp	569405372949	154096155533	44851807028365	4	240	0	2.4
4IP-1b55_min-rdock-solv	639923172437	502982662333	601059136571	0	240	0	2.4
4IP-1b55_min-rdock-std	679578285688	502339314309	5796043354946	0	240	0	2.4
4IP-1b55_min-vina-std ERR ERR ERR ERR 2.40 4IP-1b55_min-vina-std ERR							0
4IP-1fao_min-autodock-ga	677936694527	303816257324	5061441599216	0	180	0	1.8
4IP-1fao_min-autodock-lga	592114002959	235180775453	4388219559411	0	180	0	1.8
4IP-1fao_min-autodock-ls	6547284748	315342059177	5061976290604	0	180	0	1.8
4IP-1fao_min-glide-sp	572782314356	101961785524	34141428269365	7	180	0	1.8
4IP-1fao_min-gold-asp	568454135796	131837025555	28188647803255	13	180	1	1.8
4IP-1fao_min-gold-chemscore	6052619453	124681053922	3309879178224	7	180	0	1.8
4IP-1fao_min-gold-goldscore	346369245098	120106977717	1667099530843	17	180	3	1.8
4IP-1fao_min-gold-plp	688534189578	12785284056	3020679068276	10	180	0	1.8
4IP-1fao_min-moe-AffinitydG	282948942119	578917740271	17503721737333	0	180	0	1.8
4IP-1fao_min-moe-GBVIWSA	317145548802	560473211415	182046297129205	0	180	0	1.8
4IP-1fao_min-moe-LondondG	688611679136	27590928051	50184678581255	0	180	0	1.8
4IP-1fao_min-plants-chemplp	532442038086	145620378247	37088273066715	3	180	0	1.8
4IP-1fao_min-plants-plp95	580198419222	117507556611	2959658962966	11	180	1	1.8
4IP-1fao_min-plants-plp	538230484876	140383862066	35164413498405	8	180	0	1.8
4IP-1fao_min-rdock-solv	113053256659	102993989289	109094077923	0	180	0	1.8
4IP-1fao_min-rdock-std	11204214619	103215437864	1082583487814	0	180	0	1.8
4IP-1fao_min-vina-std	129493137049	119106175623	53527569659725	1	180	0	1.8
4NC-1eoc_min-autodock-ga ERR ERR ERR ERR 1.80 4NC-1eoc_min-autodock-ga ERR							0
4NC-1eoc_min-autodock-lga ERR ERR ERR ERR 1.80 4NC-1eoc_min-autodock-lga ERR							0
4NC-1eoc_min-autodock-ls ERR ERR ERR ERR 1.80 4NC-1eoc_min-autodock-ls ERR							0
4NC-1eoc_min-glide-sp	557111804447	142797216296	3407767990197	4	225	0	2.25
4NC-1eoc_min-gold-asp	47589790305	491065823212	230150540156385	9	225	0	2.25
4NC-1eoc_min-gold-chemscore	449488659297	834751301015	356797542333175	1	225	0	2.25
4NC-1eoc_min-gold-goldscore	45192302803	164719394674	2347080119245	15	225	1	2.25
4NC-1eoc_min-gold-plp	450673757945	387054169336	340787921215495	4	225	0	2.25
4NC-1eoc_min-moe-AffinitydG	33903334238	202090216128	208925616245425	1	225	0	2.25
4NC-1eoc_min-moe-GBVIWSA	374532012978	775798904356	229547718065805	0	225	0	2.25
4NC-1eoc_min-moe-LondondG	342780734913	202090216128	1834098721277	1	225	0	2.25
4NC-1eoc_min-plants-chemplp	4503365567	328240344316	287436730153495	7	225	0	2.25
4NC-1eoc_min-plants-plp95	453169457117	274763935042	33668350628509	5	225	0	2.25
4NC-1eoc_min-plants-plp	449800933404	294189932465	30857679823442	5	225	0	2.25
4NC-1eoc_min-rdock-solv	416160495275	969698853909	25392042072527	6	225	0	2.25
4NC-1eoc_min-rdock-std	404849572816	100687064485	32051143708625	2	225	0	2.25
4NC-1eoc_min-vina-std ERR ERR ERR ERR 2.25 4NC-1eoc_min-vina-std ERR							0
4PP-1xka_min-autodock-ga ERR ERR ERR ERR 2.25 4PP-1xka_min-autodock-ga ERR							0
4PP-1xka_min-autodock-lga ERR ERR ERR ERR 2.25 4PP-1xka_min-autodock-lga ERR							0
4PP-1xka_min-autodock-ls ERR ERR ERR ERR 2.25 4PP-1xka_min-autodock-ls ERR							0
4PP-1xka_min-glide-sp	10273561029	251980217888	867359613231	0	230	0	2.3
4PP-1xka_min-gold-asp	100333385693	94007335187	24610539632605	10	230	0	2.3
4PP-1xka_min-gold-chemscore	106589631493	137963490448	82767812706665	1	230	0	2.3
4PP-1xka_min-gold-goldscore	269179133561	135839866501	21051656817465	13	230	3	2.3
4PP-1xka_min-gold-plp	108513379916	348433267247	527345655275535	6	230	0	2.3
4PP-1xka_min-moe-AffinitydG	323789085986	800840083912	23911378657128	0	230	0	2.3
4PP-1xka_min-moe-GBVIWSA	418467862413	852081693509	24431748618939	0	230	0	2.3
4PP-1xka_min-moe-LondondG	326464054836	718257826151	23935232316096	0	230	0	2.3
4PP-1xka_min-plants-chemplp	939439606115	103527452964	4337131031602	12	230	1	2.3
4PP-1xka_min-plants-plp95	864744443672	127248394895	56486647472735	4	230	0	2.3
4PP-1xka_min-plants-plp	109849608427	768811829431	90248516636705	0	230	0	2.3
4PP-1xka_min-rdock-solv	850810305478	713458599439	81076112027045	0	230	0	2.3
4PP-1xka_min-rdock-std	86481488499	71666556733	80677007918225	0	230	0	2.3
4PP-1xka_min-vina-std ERR ERR ERR ERR 2.30 4PP-1xka_min-vina-std ERR							0
4SP-1h1s_min-autodock-ga ERR ERR ERR ERR 2.30 4SP-1h1s_min-autodock-ga ERR							0
4SP-1h1s_min-autodock-lga ERR ERR ERR ERR 2.30 4SP-1h1s_min-autodock-lga ERR							0
4SP-1h1s_min-autodock-ls ERR ERR ERR ERR 2.30 4SP-1h1s_min-autodock-ls ERR							0
4SP-1h1s_min-glide-sp	651043811163	909194038107	457795343815345	2	200	0	2
4SP-1h1s_min-gold-asp	764462418048	663290809417	12904034479114	19	200	2	2
4SP-1h1s_min-gold-chemscore	789055053244	450007489223	42890696271366	5	200	0	2
4SP-1h1s_min-gold-goldscore	115998187317	337765723965	7515605094431	20	200	3	2
4SP-1h1s_min-gold-plp	670639451635	238444595991	125694790739785	18	200	2	2
4SP-1h1s_min-moe-AffinitydG	347578167991	54030070166	19601860517433	0	200	0	2
4SP-1h1s_min-moe-GBVIWSA	346254771195	835511311157	243291212923135	0	200	0	2
4SP-1h1s_min-moe-LondondG	335049046324	839266462028	21483990530874	0	200	0	2
4SP-1h1s_min-plants-chemplp	684402875633	271372587178	20883333965553	16	200	1	2
4SP-1h1s_min-plants-plp95	666046296294	296722479167	14260544109873	19	200	2	2
4SP-1h1s_min-plants-plp	685394563578	244260528359	20814325500834	14	200	1	2
4SP-1h1s_min-rdock-solv	672265422729	85930438832	27209923481345	13	200	1	2
4SP-1h1s_min-rdock-std	895880667153	575604243383	397158489151315	10	200	0	2
4SP-1h1s_min-vina-std ERR ERR ERR ERR 2.00 4SP-1h1s_min-vina-std ERR							0
4TR-1xq0_min-autodock-ga	791399473273	640281390686	280849364886025	8	176	0	1.76
4TR-1xq0_min-autodock-lga	245963591103	24236452344	2442613228592	0	176	0	1.76
4TR-1xq0_min-autodock-ls	783195592145	415011684798	5821843146622	0	176	0	1.76
4TR-1xq0_min-glide-sp	790074798001	228976866711	5866524231351	0	176	0	1.76
4TR-1xq0_min-gold-asp	848003535933	810768594207	8304507495222	0	176	0	1.76
4TR-1xq0_min-gold-chemscore	826052392325	228687422058	61162700825005	0	176	0	1.76
4TR-1xq0_min-gold-goldscore	879090779246	131735596936	51541668243145	1	176	0	1.76
4TR-1xq0_min-gold-plp	842485748885	771246555812	82017095738685	0	176	0	1.76
4TR-1xq0_min-moe-AffinitydG	335590726757	581761076706	225884530734475	0	176	0	1.76
4TR-1xq0_min-moe-GBVIWSA	327607088208	114165805982	25889221812735	0	176	0	1.76
4TR-1xq0_min-moe-LondondG	306602005943	583415127599	2085821979654	0	176	0	1.76
4TR-1xq0_min-plants-chemplp	48089130415	396428853049	4473675688935	0	176	0	1.76
4TR-1xq0_min-plants-plp95	770687444794	339535724674	498481655764	0	176	0	1.76
4TR-1xq0_min-plants-plp	481281710774	382117875375	4423212198319	0	176	0	1.76
4TR-1xq0_min-rdock-solv	699643732285	402298328055	61229351605455	0	176	0	1.76
4TR-1xq0_min-rdock-std	702479238167	438417929416	64975269306095	0	176	0	1.76
4TR-1xq0_min-vina-std	886113557851	409470163522	66293000708961	1	176	0	1.76
4TZ-1xpz_min-autodock-ga	741844220118	59639207322	6126483434489	0	202	0	2.02
4TZ-1xpz_min-autodock-lga	736941597989	733660097624	7358416586685	0	202	0	2.02
4TZ-1xpz_min-autodock-ls	755133073601	587114989392	6387129194652	0	202	0	2.02
4TZ-1xpz_min-glide-sp	843921584748	170826103133	60174720183575	1	202	0	2.02
4TZ-1xpz_min-gold-asp	771754276303	263672974185	5699884340274	0	202	0	2.02
4TZ-1xpz_min-gold-chemscore	823542348659	191991180767	6480185318022	1	202	0	2.02
4TZ-1xpz_min-gold-goldscore ERR ERR ERR ERR 2.02 4TZ-1xpz_min-gold-goldscore ERR							0
4TZ-1xpz_min-gold-plp	807873582632	373415495986	7411793541655	0	202	0	2.02
4TZ-1xpz_min-moe-AffinitydG	307734042697	360074413784	14409106011223	0	202	0	2.02
4TZ-1xpz_min-moe-GBVIWSA	314439979224	517749890985	227143017444675	0	202	0	2.02
4TZ-1xpz_min-moe-LondondG	21245920097	455551933204	153845040162155	0	202	0	2.02
4TZ-1xpz_min-plants-chemplp	779809180947	20338989848	3582842291327	0	202	0	2.02
4TZ-1xpz_min-plants-plp95	813015351788	375167594442	615508377324	0	202	0	2.02
4TZ-1xpz_min-plants-plp	780348579795	233456888204	4566061226235	0	202	0	2.02
4TZ-1xpz_min-rdock-solv	720407429619	636893160057	6626097121517	0	202	0	2.02
4TZ-1xpz_min-rdock-std	729844764783	649092259387	6865062962993	0	202	0	2.02
4TZ-1xpz_min-vina-std	765362996583	565936337137	66172588583355	0	202	0	2.02
515-1nny_min-autodock-ga	111207855676	524741303738	84138443716325	0	240	0	2.4
515-1nny_min-autodock-lga	115051384197	417301586114	8381058645633	0	240	0	2.4
515-1nny_min-autodock-ls	783918231441	50251909041	6746888475803	0	240	0	2.4
515-1nny_min-glide-sp	114858617808	398780770013	9025953239051	0	240	0	2.4
515-1nny_min-gold-asp	136504343719	341521182754	58586700461535	0	240	0	2.4
515-1nny_min-gold-chemscore	154761970524	346946484381	8223557102682	0	240	0	2.4
515-1nny_min-gold-goldscore	589037118837	106416054639	32483737979195	5	240	0	2.4
515-1nny_min-gold-plp	13907153606	30229866127	83546281620915	0	240	0	2.4
515-1nny_min-moe-AffinitydG	401689571722	159627149728	29035453637365	0	240	0	2.4
515-1nny_min-moe-GBVIWSA	394001156636	159627149728	28924757479055	0	240	0	2.4
515-1nny_min-moe-LondondG	410929174554	52691065352	23413691856141	0	240	0	2.4
515-1nny_min-plants-chemplp	13330095744	322628372028	10732384298743	0	240	0	2.4
515-1nny_min-plants-plp95	134058753452	324216076921	7842742433124	0	240	0	2.4
515-1nny_min-plants-plp	122541916753	799723277177	112468147507485	0	240	0	2.4
515-1nny_min-rdock-solv	149723025275	129492010037	14015704823195	0	240	0	2.4
515-1nny_min-rdock-std	146115305893	127310635531	13653509939505	0	240	0	2.4
515-1nny_min-vina-std	106689045122	136942714232	8835929563093	1	240	0	2.4
564-1fcy_min-autodock-ga	245285942918	456728320362	1697820143755	7	130	0	1.3
564-1fcy_min-autodock-lga	240576257177	352496515023	9824890873153	16	130	2	1.3
564-1fcy_min-autodock-ls	28013732593	147810238318	19725381537065	0	130	0	1.3
564-1fcy_min-glide-sp	22718702556	610393383613	1561281487621	1	130	0	1.3
564-1fcy_min-gold-asp	687083567171	227433782709	54762423073855	20	130	2	1.3
564-1fcy_min-gold-chemscore	890103926323	344549972353	56695613503975	20	130	2	1.3
564-1fcy_min-gold-goldscore	653794815962	258314169182	50058399555945	20	130	2	1.3
564-1fcy_min-gold-plp	723449652706	28028343044	49772304999155	20	130	3	1.3
564-1fcy_min-moe-AffinitydG	332307258816	151647841953	22461408722895	0	130	0	1.3
564-1fcy_min-moe-GBVIWSA	305070855789	188432734674	22429184930215	0	130	0	1.3
564-1fcy_min-moe-LondondG	229923175633	164937413971	18606404337735	0	130	0	1.3
564-1fcy_min-plants-chemplp	952662281352	604149064444	23650099829531	4	130	0	1.3
564-1fcy_min-plants-plp95	294321685652	677127445092	176290268031115	8	130	0	1.3
564-1fcy_min-plants-plp	951873083247	623742174852	21751390050455	6	130	0	1.3
564-1fcy_min-rdock-solv	288282270365	372367850662	164894676243545	9	130	0	1.3
564-1fcy_min-rdock-std	287556722183	391281415617	129860448315715	12	130	2	1.3
564-1fcy_min-vina-std	123616550086	611878086798	813725275525453	1	130	0	1.3
570-1fm9_min-autodock-ga ERR ERR ERR ERR 1.30 570-1fm9_min-autodock-ga ERR							0
570-1fm9_min-autodock-lga ERR ERR ERR ERR 1.30 570-1fm9_min-autodock-lga ERR							0
570-1fm9_min-autodock-ls ERR ERR ERR ERR 1.30 570-1fm9_min-autodock-ls ERR							0
570-1fm9_min-glide-sp	128428137482	158920260838	9878916510964	1	210	0	2.1
570-1fm9_min-gold-asp	136001782269	84408303906	102310446610165	1	210	0	2.1
570-1fm9_min-gold-chemscore	170688726985	458819513673	102528862946605	0	210	0	2.1
570-1fm9_min-gold-goldscore	119017389729	282652416816	105702337454555	0	210	0	2.1
570-1fm9_min-gold-plp	16263291898	396471330277	10240150601191	0	210	0	2.1
570-1fm9_min-moe-AffinitydG	335200748868	175749619144	2406167067591	0	210	0	2.1
570-1fm9_min-moe-GBVIWSA	335215266766	189096109819	24964106241075	0	210	0	2.1
570-1fm9_min-moe-LondondG	277402029307	108570378074	22783979298435	0	210	0	2.1
570-1fm9_min-plants-chemplp	42969343869	725752388568	25203023947239	5	210	0	2.1
570-1fm9_min-plants-plp95	493536042132	110357867933	3131863933648	2	210	0	2.1
570-1fm9_min-plants-plp	462815303892	590937505466	29432104471968	3	210	0	2.1
570-1fm9_min-rdock-solv	119374402123	254288521551	9530043973938	0	210	0	2.1
570-1fm9_min-rdock-std	122188511857	626416672355	107053824311925	0	210	0	2.1
570-1fm9_min-vina-std ERR ERR ERR ERR 2.10 570-1fm9_min-vina-std ERR							0
588-1ony_min-autodock-ga	881349605891	424570989784	59807191730535	0	215	0	2.15
588-1ony_min-autodock-lga	825951095818	480784030669	6317124943952	0	215	0	2.15
588-1ony_min-autodock-ls	760460919283	450778498416	62323439313085	0	215	0	2.15
588-1ony_min-glide-sp	991587057712	154682055016	47366803536705	3	215	0	2.15
588-1ony_min-gold-asp	132625660799	246865392476	6301703590452	0	215	0	2.15
588-1ony_min-gold-chemscore	87881647977	355212670883	5658395404913	0	215	0	2.15
588-1ony_min-gold-goldscore	505704356801	828354213736	24254333760758	11	215	1	2.15
588-1ony_min-gold-plp	102348035941	306154316326	56357821325425	0	215	0	2.15
588-1ony_min-moe-AffinitydG	331000464026	557953137293	208791223394045	0	215	0	2.15
588-1ony_min-moe-GBVIWSA	42147072649	126309010474	25287730179335	0	215	0	2.15
588-1ony_min-moe-LondondG	251260316366	405007821966	119869404275755	0	215	0	2.15
588-1ony_min-plants-chemplp	809743817448	34171636812	5400382875107	0	215	0	2.15
588-1ony_min-plants-plp95	906790658911	329796600565	50042059141375	0	215	0	2.15
588-1ony_min-plants-plp	878394135246	441778579751	64630985955245	0	215	0	2.15
588-1ony_min-rdock-solv	109551394617	932159029538	10143851687215	0	215	0	2.15
588-1ony_min-rdock-std	104456073642	909184631634	9742216767699	0	215	0	2.15
588-1ony_min-vina-std	844918609589	745776416505	553667730157625	1	215	0	2.15
5GP-1qk3_min-autodock-ga ERR ERR ERR ERR 2.15 5GP-1qk3_min-autodock-ga ERR							0
5GP-1qk3_min-autodock-lga ERR ERR ERR ERR 2.15 5GP-1qk3_min-autodock-lga ERR							0
5GP-1qk3_min-autodock-ls ERR ERR ERR ERR 2.15 5GP-1qk3_min-autodock-ls ERR							0
5GP-1qk3_min-glide-sp	384328754595	634380019849	16859169444317	13	165	0	1.65
5GP-1qk3_min-gold-asp	101823741133	663536750427	8684988898561	20	165	3	1.65
5GP-1qk3_min-gold-chemscore	391941526017	770918137137	253757460413385	7	165	0	1.65
5GP-1qk3_min-gold-goldscore	128280568189	813323135865	10010572720011	20	165	2	1.65
5GP-1qk3_min-gold-plp	31282476264	663989158734	11429295209495	18	165	2	1.65
5GP-1qk3_min-moe-AffinitydG	391738797686	112058321701	26352623925785	0	165	0	1.65
5GP-1qk3_min-moe-GBVIWSA	38260096644	936921477277	23772614116207	0	165	0	1.65
5GP-1qk3_min-moe-LondondG	330762039344	198009866337	23187783767085	0	165	0	1.65
5GP-1qk3_min-plants-chemplp	558714998169	747681352025	29443742778794	9	165	0	1.65
5GP-1qk3_min-plants-plp95	308630178808	459180006007	141224169800885	15	165	2	1.65
5GP-1qk3_min-plants-plp	11719237686	201636352698	4282564492845	0	165	0	1.65
5GP-1qk3_min-rdock-solv	126536662024	852445464043	607134184641065	9	165	0	1.65
5GP-1qk3_min-rdock-std	118986876957	104644932012	64940826040215	3	165	0	1.65
5GP-1qk3_min-vina-std ERR ERR ERR ERR 1.65 5GP-1qk3_min-vina-std ERR							0
5HU-1mrs_min-autodock-ga	713572067775	113898858642	429167678742	3	200	0	2
5HU-1mrs_min-autodock-lga	788209190334	819040819274	30971383578382	11	200	1	2
5HU-1mrs_min-autodock-ls	498726795769	273737829949	33266755810565	0	200	0	2
5HU-1mrs_min-glide-sp	103891427065	699896356753	8751962931071	0	200	0	2
5HU-1mrs_min-gold-asp	673079211865	189397402197	4312820938924	1	200	0	2
5HU-1mrs_min-gold-chemscore	103794499943	946399269384	100435831460745	0	200	0	2
5HU-1mrs_min-gold-goldscore	100513886376	896781448104	98207808158655	0	200	0	2
5HU-1mrs_min-gold-plp	102038948508	117610435027	78493627421595	4	200	0	2
5HU-1mrs_min-moe-AffinitydG	301985514591	67234251282	19443551587386	0	200	0	2
5HU-1mrs_min-moe-GBVIWSA	397931240674	110208594348	23060251341255	0	200	0	2
5HU-1mrs_min-moe-LondondG	335879268948	67234251282	191282152440105	0	200	0	2
5HU-1mrs_min-plants-chemplp	270931738375	694558056674	129063480811755	19	200	3	2
5HU-1mrs_min-plants-plp95	510365938915	106289943273	1692780380806	16	200	2	2
5HU-1mrs_min-plants-plp	286543015008	888453977168	153152755243255	17	200	2	2
5HU-1mrs_min-rdock-solv	105082557929	534239042807	84645969401845	0	200	0	2
5HU-1mrs_min-rdock-std	105332234309	154133361544	79027405199405	1	200	0	2
5HU-1mrs_min-vina-std	995651756845	107539284577	66415461748525	2	200	0	2
5MP-1li6_min-autodock-ga	299740498876	635977593945	170031292028335	12	200	2	2
5MP-1li6_min-autodock-lga	291088053688	287169595652	2885752087841	0	200	0	2
5MP-1li6_min-autodock-ls	275682682929	859654969547	109747694001785	19	200	2	2
5MP-1li6_min-glide-sp	258436539954	402298059072	159617775448162	8	200	1	2
5MP-1li6_min-gold-asp	281514857186	934832320972	245977587014625	3	200	0	2
5MP-1li6_min-gold-chemscore	289807433595	273684921945	2833106288776	0	200	0	2
5MP-1li6_min-gold-goldscore	115671932133	970703136048	10495680145179	20	200	3	2
5MP-1li6_min-gold-plp	282362978304	265330020038	2727294060063	0	200	0	2
5MP-1li6_min-moe-AffinitydG	227194404677	225123155184	15935434989611	0	200	0	2
5MP-1li6_min-moe-GBVIWSA	221864134175	99055855203	149631161247245	0	200	0	2
5MP-1li6_min-moe-LondondG	184732797846	14712724725	16389159663165	0	200	0	2
5MP-1li6_min-plants-chemplp	119282427824	50439391848	458729634890175	3	200	0	2
5MP-1li6_min-plants-plp95	121818234998	246570013485	10462232953148	0	200	0	2
5MP-1li6_min-plants-plp	118994085794	432166862064	355293627313865	5	200	0	2
5MP-1li6_min-rdock-solv	953290665642	898217976932	93339288555805	0	200	0	2
5MP-1li6_min-rdock-std	100385855108	901561693498	91892233926255	0	200	0	2
5MP-1li6_min-vina-std	164036002146	409577831431	107140328451445	2	200	0	2
5RP-1uj5_min-autodock-ga	789072247281	214656687693	59057405718505	0	200	0	2
5RP-1uj5_min-autodock-lga	811656047843	155136244268	43305894506305	3	200	0	2
5RP-1uj5_min-autodock-ls	833804596842	37410870269	544866081937	0	200	0	2
5RP-1uj5_min-glide-sp	191047440556	502125973096	14170491356433	20	200	0	2
5RP-1uj5_min-gold-asp	181048020149	978690540613	140508738282965	20	200	2	2
5RP-1uj5_min-gold-chemscore	501457327767	562643163369	16896154184429	13	200	2	2
5RP-1uj5_min-gold-goldscore	614777839764	103892194159	19097927725295	14	200	2	2
5RP-1uj5_min-gold-plp	186508412066	109549087041	1342922961034	20	200	3	2
5RP-1uj5_min-moe-AffinitydG	283818774271	293437069184	17412737255576	0	200	0	2
5RP-1uj5_min-moe-GBVIWSA	290142649866	123376752991	20746172576865	0	200	0	2
5RP-1uj5_min-moe-LondondG	20169583038	184292169045	154254489780615	1	200	0	2
5RP-1uj5_min-plants-chemplp	236952164039	113089375875	1670189898838	16	200	2	2
5RP-1uj5_min-plants-plp95	263762005861	106144768292	1839944695422	11	200	2	2
5RP-1uj5_min-plants-plp	561801487951	111569449704	1942363975411	16	200	2	2
5RP-1uj5_min-rdock-solv	618851939707	108537418564	38588265467575	4	200	0	2
5RP-1uj5_min-rdock-std	583030620925	101009285641	37562426848205	7	200	0	2
5RP-1uj5_min-vina-std	102162104905	103523068513	48433579317905	2	200	0	2
607-1o36_min-autodock-ga	488918159193	265416598116	4283324142523	0	170	0	1.7
607-1o36_min-autodock-lga	474438243844	472871190471	4736386796402	0	170	0	1.7
607-1o36_min-autodock-ls	894004393477	642072583514	8111404671508	0	170	0	1.7
607-1o36_min-glide-sp	12252227822	185282175209	7976783406444	0	170	0	1.7
607-1o36_min-gold-asp	508676814772	194403978804	26913103113725	0	170	0	1.7
607-1o36_min-gold-chemscore	410801179915	979626598364	21938622669417	4	170	0	1.7
607-1o36_min-gold-goldscore	825348808096	265897919662	5405565936142	0	170	0	1.7
607-1o36_min-gold-plp	538747006975	202626728021	38115753060585	0	170	0	1.7
607-1o36_min-moe-AffinitydG	305408622022	552705721378	162808187086425	0	170	0	1.7
607-1o36_min-moe-GBVIWSA	313338518716	852135873849	218782025676395	0	170	0	1.7
607-1o36_min-moe-LondondG	301804607118	724544609278	21044951886479	0	170	0	1.7
607-1o36_min-plants-chemplp	533297322271	112195689806	26842432522745	3	170	0	1.7
607-1o36_min-plants-plp95	532911115538	132124908231	4013120560124	1	170	0	1.7
607-1o36_min-plants-plp	922989873903	94545718306	3307219341985	2	170	0	1.7
607-1o36_min-rdock-solv	930594320015	703017232043	8419957553751	0	170	0	1.7
607-1o36_min-rdock-std	936615516768	757397362905	85619443090285	0	170	0	1.7
607-1o36_min-vina-std	117768840838	10469437266	81992617081475	1	170	0	1.7
623-1qb6_min-autodock-ga	678651836237	193096098998	8488644737879	19	180	2	1.8
623-1qb6_min-autodock-lga	194086720752	149296626749	16983292078495	20	180	3	1.8
623-1qb6_min-autodock-ls	718001710689	132535123516	4913201955372	1	180	0	1.8
623-1qb6_min-glide-sp	800621970636	157114590183	48155609171235	1	180	0	1.8
623-1qb6_min-gold-asp	79548078506	160855289163	43563707076335	3	180	0	1.8
623-1qb6_min-gold-chemscore	132055523037	161757970629	31527284742495	3	180	0	1.8
623-1qb6_min-gold-goldscore	777965191044	154805281452	28102332183025	3	180	0	1.8
623-1qb6_min-gold-plp	784769491751	166785127696	28432782374705	2	180	0	1.8
623-1qb6_min-moe-AffinitydG	305047050486	312454718374	15531597435503	0	180	0	1.8
623-1qb6_min-moe-GBVIWSA	342944634739	330695032965	21850407860423	0	180	0	1.8
623-1qb6_min-moe-LondondG	176300650369	18392294301	7184323890817	0	180	0	1.8
623-1qb6_min-plants-chemplp	746299966762	175425235278	34975544500335	2	180	0	1.8
623-1qb6_min-plants-plp95	791387259579	141439579546	4861837621202	1	180	0	1.8
623-1qb6_min-plants-plp	805662125881	181392312606	38073691151005	0	180	0	1.8
623-1qb6_min-rdock-solv	756380295552	492830173474	66563314377555	0	180	0	1.8
623-1qb6_min-rdock-std	77138815159	51366895541	67123982878545	0	180	0	1.8
623-1qb6_min-vina-std	119349955203	349975811972	73237050783676	1	180	0	1.8
653-1o38_min-autodock-ga	87241489761	975128013574	65606451670142	1	138	0	1.38
653-1o38_min-autodock-lga	856629155678	103008553736	7205326381831	2	138	0	1.38
653-1o38_min-autodock-ls	100543838484	624419366864	9109260449027	0	138	0	1.38
653-1o38_min-glide-sp	139007589351	573909951019	10341465960297	0	138	0	1.38
653-1o38_min-gold-asp	298935453001	615832042559	9784876632724	19	138	2	1.38
653-1o38_min-gold-chemscore	105167817909	764848245919	40954883647078	7	138	0	1.38
653-1o38_min-gold-goldscore ERR ERR ERR ERR 1.38 653-1o38_min-gold-goldscore ERR							0
653-1o38_min-gold-plp	439708612415	134941862098	3646212200687	1	138	0	1.38
653-1o38_min-moe-AffinitydG	249577936704	420313487174	13783806547441	0	138	0	1.38
653-1o38_min-moe-GBVIWSA	331700144585	864274837446	20772670425828	0	138	0	1.38
653-1o38_min-moe-LondondG	319798340644	381621582854	21375794331096	0	138	0	1.38
653-1o38_min-plants-chemplp	140983269815	425107608226	94329854423595	19	138	3	1.38
653-1o38_min-plants-plp95	425715789172	578372227833	222380427154665	8	138	0	1.38
653-1o38_min-plants-plp	428863210326	731768650258	22522937313354	9	138	0	1.38
653-1o38_min-rdock-solv	116051989935	810612768893	9265103607323	0	138	0	1.38
653-1o38_min-rdock-std	993838054128	813687158094	8576904442425	0	138	0	1.38
653-1o38_min-vina-std	115371107565	11801827189	7550624134706	1	138	0	1.38
656-1o2j_min-autodock-ga	49688354479	678376616146	23915148706626	9	165	0	1.65
656-1o2j_min-autodock-lga	933130640193	875664961615	90252831732125	20	165	3	1.65
656-1o2j_min-autodock-ls	522967827245	55904636063	218147544456115	12	165	1	1.65
656-1o2j_min-gold-asp	351555309749	550164564017	140342462027785	15	165	2	1.65
656-1o2j_min-gold-chemscore	104224197816	583165690792	356305214852175	10	165	0	1.65
656-1o2j_min-gold-goldscore	494141192238	652916937673	22217564272023	2	165	0	1.65
656-1o2j_min-gold-plp	124737629013	711979555828	9564733231904	20	165	2	1.65
656-1o2j_min-moe-AffinitydG	250333417449	650643720032	149136538655965	0	165	0	1.65
656-1o2j_min-moe-GBVIWSA	345530694168	514430185983	15653944596781	0	165	0	1.65
656-1o2j_min-moe-LondondG	220650387614	189209948426	8740184798051	0	165	0	1.65
656-1o2j_min-plants-chemplp	402069326801	700413908581	18831382478687	12	165	1	1.65
656-1o2j_min-plants-plp95	375496136909	721277415135	200450915614825	6	165	0	1.65
656-1o2j_min-plants-plp	101693107612	895042910982	329706795846	8	165	0	1.65
656-1o2j_min-rdock-solv	101653535639	96056253685	9906691574027	0	165	0	1.65
656-1o2j_min-rdock-std	10173926855	891511102917	9662418439362	0	165	0	1.65
656-1o2j_min-vina-std	113161778497	866060573324	77673355378737	1	165	0	1.65
667-1ttm_min-autodock-ga	749854573837	659214629764	6966167227066	0	195	0	1.95
667-1ttm_min-autodock-lga	71014675948	682194623815	7049731364923	0	195	0	1.95
667-1ttm_min-autodock-ls	731166795185	519168598177	66043387463035	0	195	0	1.95
667-1ttm_min-glide-sp	733712816447	131376851589	42767571714275	1	195	0	1.95
667-1ttm_min-gold-asp	764484225444	542099046476	35852385414086	2	195	0	1.95
667-1ttm_min-gold-chemscore	709294905543	387900872297	67008821666635	0	195	0	1.95
667-1ttm_min-gold-goldscore	663268015999	484459681354	35142175994007	1	195	0	1.95
667-1ttm_min-gold-plp	76267909813	11777236152	6430014660411	1	195	0	1.95
667-1ttm_min-moe-AffinitydG	31307709453	339447001965	237725695490545	0	195	0	1.95
667-1ttm_min-moe-GBVIWSA	339225031807	122060329385	2568461748909	0	195	0	1.95
667-1ttm_min-moe-LondondG	283232406489	202542561077	243394187748385	0	195	0	1.95
667-1ttm_min-plants-chemplp	70688201381	132416037836	3689037433368	3	195	0	1.95
667-1ttm_min-plants-plp95	704085306057	856116998847	331743876321905	5	195	0	1.95
667-1ttm_min-plants-plp	703712002544	913254958924	37038171629772	5	195	0	1.95
667-1ttm_min-rdock-solv	715788896992	49960056692	61323497939855	0	195	0	1.95
667-1ttm_min-rdock-std	671514063686	49694396746	6079240075073	0	195	0	1.95
667-1ttm_min-vina-std	104513926709	62589319034	49492332553995	1	195	0	1.95
675-1owe_min-autodock-ga	892955867789	269586973653	138298867842375	14	160	3	1.6
675-1owe_min-autodock-lga	268930054272	120898341969	238672001848	2	160	0	1.6
675-1owe_min-autodock-ls	79368878862	720612474345	775571289209	0	160	0	1.6
675-1owe_min-glide-sp	133344041004	333087608596	97243624909413	3	160	0	1.6
675-1owe_min-gold-asp	209053717336	141594078378	175783559437	6	160	0	1.6
675-1owe_min-gold-chemscore	216621696785	166603504369	19286759243875	0	160	0	1.6
675-1owe_min-gold-goldscore	28202461851	872000355244	19977265645147	1	160	0	1.6
675-1owe_min-gold-plp	191799900085	160245020175	17993949332455	0	160	0	1.6
675-1owe_min-moe-AffinitydG	293842265185	977515269353	189951042497315	0	160	0	1.6
675-1owe_min-moe-GBVIWSA	31358088344	228964360069	205254799604175	0	160	0	1.6
675-1owe_min-moe-LondondG	262684936093	115181604059	2158058505861	0	160	0	1.6
675-1owe_min-plants-chemplp	259158249715	324149810343	16082679302695	8	160	0	1.6
675-1owe_min-plants-plp95	560121309738	274515673505	244500881067825	2	160	0	1.6
675-1owe_min-plants-plp	9191395739	746824956064	263028133801835	8	160	0	1.6
675-1owe_min-rdock-solv	886589811499	32607022146	50700333753865	0	160	0	1.6
675-1owe_min-rdock-std	900904492219	312605859815	4610158775759	0	160	0	1.6
675-1owe_min-vina-std	134523629996	155081036001	78523718338645	1	160	0	1.6
678-1o3l_min-autodock-ga	823524956867	601411395524	31623948943192	4	140	0	1.4
678-1o3l_min-autodock-lga	779336763965	696365594833	14321045745069	17	140	1	1.4
678-1o3l_min-autodock-ls	898094979665	147504050792	39154913706235	0	140	0	1.4
678-1o3l_min-glide-sp	131751236313	78243724501	111166981809605	0	140	0	1.4
678-1o3l_min-gold-asp	337106184724	529563253225	262002145975465	5	140	0	1.4
678-1o3l_min-gold-chemscore	282471922963	502549273704	158243389955755	11	140	1	1.4
678-1o3l_min-gold-goldscore	354781777588	270984577413	31800421417635	0	140	0	1.4
678-1o3l_min-gold-plp	325474000146	278884320186	3091653039293	0	140	0	1.4
678-1o3l_min-moe-AffinitydG	278700599075	649428474378	177679737905	0	140	0	1.4
678-1o3l_min-moe-GBVIWSA	328777649173	735160470578	19812235253641	0	140	0	1.4
678-1o3l_min-moe-LondondG	286279874671	330891505381	81926477412765	0	140	0	1.4
678-1o3l_min-plants-chemplp	334258596499	703781414929	22263929210224	5	140	0	1.4
678-1o3l_min-plants-plp95	380686322269	856105451546	27252145701418	3	140	0	1.4
678-1o3l_min-plants-plp	341623765798	520436021925	21848442649138	3	140	0	1.4
678-1o3l_min-rdock-solv	105531100262	490734850017	7569528198951	0	140	0	1.4
678-1o3l_min-rdock-std	861119608673	522388294323	72045978288655	0	140	0	1.4
678-1o3l_min-vina-std	859032712319	976853686588	63058692022809	1	140	0	1.4
688-1qbn_min-autodock-ga	868841351132	395186566304	6938954065865	0	180	0	1.8
688-1qbn_min-autodock-lga	786060658243	473755029657	68927279548265	0	180	0	1.8
688-1qbn_min-autodock-ls	852210591455	566913637052	68037068089265	0	180	0	1.8
688-1qbn_min-glide-sp	8550947532	140402737865	333270356319	3	180	0	1.8
688-1qbn_min-gold-asp	844020664756	485691470998	219485778923765	9	180	0	1.8
688-1qbn_min-gold-chemscore	140575881374	152138692225	55279154239255	2	180	0	1.8
688-1qbn_min-gold-goldscore	90713928092	981505923951	224119364931845	9	180	0	1.8
688-1qbn_min-gold-plp	950340630687	835491525615	41126204884015	7	180	0	1.8
688-1qbn_min-moe-AffinitydG	275546512827	670895329951	147596127942935	0	180	0	1.8
688-1qbn_min-moe-GBVIWSA	320380923487	842114147177	21549313247327	0	180	0	1.8
688-1qbn_min-moe-LondondG	298098576004	760878308889	143205730624045	0	180	0	1.8
688-1qbn_min-plants-chemplp	596162598951	965218673896	23752172208698	6	180	0	1.8
688-1qbn_min-plants-plp95	802382804856	160851077641	3970852638481	2	180	0	1.8
688-1qbn_min-plants-plp	566092576075	141336566129	3580711141785	1	180	0	1.8
688-1qbn_min-rdock-solv	893254248995	694275719109	7963642363461	0	180	0	1.8
688-1qbn_min-rdock-std	897218257977	771743114336	81543088458655	0	180	0	1.8
688-1qbn_min-vina-std	103370816149	146400211322	6607468251352	2	180	0	1.8
693-1o30_min-autodock-ga	892985480911	135569095689	58833869215855	1	155	0	1.55
693-1o30_min-autodock-lga	810698544829	229767613419	5500536123639	0	155	0	1.55
693-1o30_min-autodock-ls	936359599884	779430086855	8738827654748	0	155	0	1.55
693-1o30_min-glide-sp	118060669373	116519232507	8542774696114	1	155	0	1.55
693-1o30_min-gold-asp	434734470368	989671301642	24087610143801	7	155	0	1.55
693-1o30_min-gold-chemscore	426023862229	103382994221	2414315046134	5	155	0	1.55
693-1o30_min-gold-goldscore	506095865387	144107951224	2402575703787	3	155	0	1.55
693-1o30_min-gold-plp	250525752856	607598757163	176273465542365	3	155	0	1.55
693-1o30_min-moe-AffinitydG	30847712005	419556630126	16822978261982	0	155	0	1.55
693-1o30_min-moe-GBVIWSA	336597849828	573787435021	202422817930865	0	155	0	1.55
693-1o30_min-moe-LondondG	262509426397	680334716064	137912375733405	0	155	0	1.55
693-1o30_min-plants-chemplp	253403815736	108143122228	18907714673195	4	155	0	1.55
693-1o30_min-plants-plp95	506725903681	132422485329	261898452833	4	155	0	1.55
693-1o30_min-plants-plp	449042193812	991850341237	195287739816335	4	155	0	1.55
693-1o30_min-rdock-solv	79626611726	312968907918	7415752816624	0	155	0	1.55
693-1o30_min-rdock-std	911873475265	297245020346	74612368553495	0	155	0	1.55
693-1o30_min-vina-std	11212079173	141619666713	6912207879476	1	155	0	1.55
696-1o3f_min-autodock-ga	873564610776	455961577329	380445773906755	7	155	0	1.55
696-1o3f_min-autodock-lga	157695198405	350725191567	69144614430025	19	155	3	1.55
696-1o3f_min-autodock-ls	876156810622	212867991018	6176119322267	0	155	0	1.55
696-1o3f_min-glide-sp	135068361215	360607537298	11105919985834	0	155	0	1.55
696-1o3f_min-gold-asp	328329372363	341006260353	10938972291763	18	155	2	1.55
696-1o3f_min-gold-chemscore	112053742525	799119921914	6867777380111	7	155	0	1.55
696-1o3f_min-gold-goldscore	25853117197	12988555581	1483696131119	17	155	2	1.55
696-1o3f_min-gold-plp	170666171973	716223360133	151523832200965	8	155	1	1.55
696-1o3f_min-moe-AffinitydG	206849935606	359906089973	119649340391405	0	155	0	1.55
696-1o3f_min-moe-GBVIWSA	293944025767	676508662177	157126403538465	0	155	0	1.55
696-1o3f_min-moe-LondondG	136275205419	191661847012	5283114049708	0	155	0	1.55
696-1o3f_min-plants-chemplp	101117094081	257110218389	25307352898698	12	155	1	1.55
696-1o3f_min-plants-plp95	100791772969	691434510854	272493095438135	5	155	0	1.55
696-1o3f_min-plants-plp	105431990574	697629413084	66518888698707	4	155	0	1.55
696-1o3f_min-rdock-solv	835345166333	717748791784	7591753525745	0	155	0	1.55
696-1o3f_min-rdock-std	754355397735	719332842267	73080534309995	0	155	0	1.55
696-1o3f_min-vina-std	115531571962	119777979612	8384061780353	1	155	0	1.55
696-1o5a_min-autodock-ga	881189756182	793252586759	84531837675075	0	168	0	1.68
696-1o5a_min-autodock-lga	861683089076	842788427543	85036585904485	0	168	0	1.68
696-1o5a_min-autodock-ls	946511133374	824030268133	8512890160595	0	168	0	1.68
696-1o5a_min-glide-sp	123620443504	139516440451	8701396769944	1	168	0	1.68
696-1o5a_min-gold-asp	199671707049	94362183739	15990548350455	10	168	1	1.68
696-1o5a_min-gold-chemscore ERR ERR ERR ERR 1.68 696-1o5a_min-gold-chemscore ERR							0
696-1o5a_min-gold-goldscore	232810818365	189907578943	2181873202201	0	168	0	1.68
696-1o5a_min-gold-plp	194115333243	165685178384	18272868575295	1	168	0	1.68
696-1o5a_min-moe-AffinitydG	30133503643	12600039711	2310403806452	0	168	0	1.68
696-1o5a_min-moe-GBVIWSA	319454662761	649411589364	192105371622885	0	168	0	1.68
696-1o5a_min-moe-LondondG	267078264185	187756240546	2422416068661	0	168	0	1.68
696-1o5a_min-plants-chemplp	850495734374	572317019492	27321127107356	5	168	0	1.68
696-1o5a_min-plants-plp95	854587765333	100707808416	27103705448625	5	168	0	1.68
696-1o5a_min-plants-plp	848831597529	71022642981	21612692671243	8	168	0	1.68
696-1o5a_min-rdock-solv	964990245542	468393605601	65373849548415	0	168	0	1.68
696-1o5a_min-rdock-std	966803089081	478147457594	60362358018075	0	168	0	1.68
696-1o5a_min-vina-std	126139482574	171765086091	7837496979749	0	168	0	1.68
6NP-1yqj_min-autodock-ga	832950927555	360402235604	228758013985545	15	200	1	2
6NP-1yqj_min-autodock-lga	54593641702	320728278409	39664637485535	20	200	3	2
6NP-1yqj_min-autodock-ls	928167067012	417549566946	8235809288682	0	200	0	2
6NP-1yqj_min-glide-sp	925588265432	12115737348	4091593970814	4	200	0	2
6NP-1yqj_min-gold-asp	911513212033	224523821199	497394491689065	3	200	0	2
6NP-1yqj_min-gold-chemscore	892477773183	404593367293	478696915314725	5	200	0	2
6NP-1yqj_min-gold-goldscore	646292737339	349270656818	450077121771525	5	200	0	2
6NP-1yqj_min-gold-plp	820715961346	28162672357	5297673424941	2	200	0	2
6NP-1yqj_min-moe-AffinitydG	335937581528	606175747264	18286014511344	0	200	0	2
6NP-1yqj_min-moe-GBVIWSA	335937581528	104709780768	2081039707763	0	200	0	2
6NP-1yqj_min-moe-LondondG	244523371369	886138999577	150220944068835	0	200	0	2
6NP-1yqj_min-plants-chemplp	810588847232	324539463592	25180624810302	13	200	1	2
6NP-1yqj_min-plants-plp95	122894630209	283072122057	469246127137245	4	200	0	2
6NP-1yqj_min-plants-plp	573588067803	29272016476	29333179090695	10	200	0	2
6NP-1yqj_min-rdock-solv	862172982671	563280420395	42209116090324	7	200	0	2
6NP-1yqj_min-rdock-std	869372058892	504209903286	47861550228578	6	200	0	2
6NP-1yqj_min-vina-std	926262037747	185525662453	593002375089015	1	200	0	2
6PG-1pgp_min-autodock-ga	679206263828	468038663561	56770628102975	0	250	0	2.5
6PG-1pgp_min-autodock-lga	843432587703	434797568179	57208385169525	0	250	0	2.5
6PG-1pgp_min-autodock-ls	563912027974	441581186993	50497551317315	0	250	0	2.5
6PG-1pgp_min-glide-sp	638005136375	17699625443	248024590068	13	250	1	2.5
6PG-1pgp_min-gold-asp	669002476141	644461396781	6565627376776	0	250	0	2.5
6PG-1pgp_min-gold-chemscore	658669938624	231763042453	5964561224039	1	250	0	2.5
6PG-1pgp_min-gold-goldscore	645662016461	226369281004	27303946933105	7	250	0	2.5
6PG-1pgp_min-gold-plp	670849019329	160776907271	52977961293615	5	250	0	2.5
6PG-1pgp_min-moe-AffinitydG	394784456575	336983912166	20238476834425	0	250	0	2.5
6PG-1pgp_min-moe-GBVIWSA	337806787563	487128245585	160528904852345	0	250	0	2.5
6PG-1pgp_min-moe-LondondG	397528302056	207569316558	70502563319485	2	250	0	2.5
6PG-1pgp_min-plants-chemplp	65809453629	170805351428	48533674275815	6	250	0	2.5
6PG-1pgp_min-plants-plp95	685283046065	168526842896	37707248714895	12	250	1	2.5
6PG-1pgp_min-plants-plp	656844014207	213832044756	5188449873032	5	250	0	2.5
6PG-1pgp_min-rdock-solv	625792518327	20121794425	3471561609155	11	250	1	2.5
6PG-1pgp_min-rdock-std	662865524779	158933643497	3706612488123	9	250	0	2.5
6PG-1pgp_min-vina-std	650614843595	183242329107	48862907636135	4	250	0	2.5
711-1qbo_min-autodock-ga	814836850505	57479445124	7086524792898	0	180	0	1.8
711-1qbo_min-autodock-lga	916875235434	523755063151	7426318189807	0	180	0	1.8
711-1qbo_min-autodock-ls	984447984316	870725314456	9292900924059	0	180	0	1.8
711-1qbo_min-glide-sp	764943791278	169269652539	5789734276693	1	180	0	1.8
711-1qbo_min-gold-asp	764078380736	53921101539	335421195059015	3	180	0	1.8
711-1qbo_min-gold-chemscore	755481564878	957838694206	33534948764498	2	180	0	1.8
711-1qbo_min-gold-goldscore	955317364038	101294725024	36606386122445	1	180	0	1.8
711-1qbo_min-gold-plp	750406862058	281913677213	3666467792578	0	180	0	1.8
711-1qbo_min-moe-AffinitydG	334467083085	589518269188	194075039208995	0	180	0	1.8
711-1qbo_min-moe-GBVIWSA	334467083085	641405148414	215195510160625	0	180	0	1.8
711-1qbo_min-moe-LondondG	279337515719	528790501439	203525505988295	0	180	0	1.8
711-1qbo_min-plants-chemplp	934333871596	687828515522	40224431331076	2	180	0	1.8
711-1qbo_min-plants-plp95	10559376642	925531663106	45464273023228	1	180	0	1.8
711-1qbo_min-plants-plp	105679855952	183187753307	4713208615656	0	180	0	1.8
711-1qbo_min-rdock-solv	915475768303	701061182664	83286648374755	0	180	0	1.8
711-1qbo_min-rdock-std	926641532798	679868376238	8204355326451	0	180	0	1.8
711-1qbo_min-vina-std	107802309631	109728377208	52647631542795	1	180	0	1.8
761-1c84_min-autodock-ga	720821620755	595582694775	65227347229695	0	235	0	2.35
761-1c84_min-autodock-lga	112712750878	826208970635	107735743408425	20	235	2	2.35
761-1c84_min-autodock-ls	854478043511	794352268402	63717783824321	1	235	0	2.35
761-1c84_min-glide-sp	776227629792	77779911728	51076237766805	5	235	0	2.35
761-1c84_min-gold-asp	140258077692	404281269988	95551810715925	20	235	3	2.35
761-1c84_min-gold-chemscore	739182359784	424003283254	28807852535001	13	235	1	2.35
761-1c84_min-gold-goldscore	166887718873	535943920377	101322177817685	20	235	2	2.35
761-1c84_min-gold-plp	67502444728	404732255227	11814170803097	19	235	2	2.35
761-1c84_min-moe-AffinitydG	357544529969	607761142053	20772291838489	0	235	0	2.35
761-1c84_min-moe-GBVIWSA	35836333147	100700132676	2691444266883	0	235	0	2.35
761-1c84_min-moe-LondondG	305066590574	120049367038	16467918663054	3	235	0	2.35
761-1c84_min-plants-chemplp	102468621639	561393025382	415476926220405	10	235	0	2.35
761-1c84_min-plants-plp95	106541543747	965637242828	40868644935419	10	235	0	2.35
761-1c84_min-plants-plp	707379521752	371049404428	47624234415284	6	235	0	2.35
761-1c84_min-rdock-solv	121935729077	5584282143	18055191508124	18	235	2	2.35
761-1c84_min-rdock-std	112709720155	435947745541	172947428424265	18	235	2	2.35
761-1c84_min-vina-std	118231763476	504731980988	80620779737879	0	235	0	2.35
762-1o2n_min-autodock-ga	862664191729	636927208738	54664883736399	7	150	0	1.5
762-1o2n_min-autodock-lga	864664653093	665736925404	509496251606755	9	150	0	1.5
762-1o2n_min-autodock-ls	886554547543	842737415304	8751467273966	0	150	0	1.5
762-1o2n_min-glide-sp	122749052889	873108719834	107871997706325	0	150	0	1.5
762-1o2n_min-gold-asp	146649256045	304966076298	14350385790413	18	150	2	1.5
762-1o2n_min-gold-chemscore	11823535121	749718350449	79921031385305	2	150	0	1.5
762-1o2n_min-gold-goldscore	999615514547	477392436939	6654678940782	20	150	3	1.5
762-1o2n_min-gold-plp	859704127485	579044261627	29359486888087	13	150	1	1.5
762-1o2n_min-moe-AffinitydG	297277297951	430892811051	16973016610325	0	150	0	1.5
762-1o2n_min-moe-GBVIWSA	325555204116	643621451093	183043745127245	0	150	0	1.5
762-1o2n_min-moe-LondondG	277143871107	131528136768	2191985268682	0	150	0	1.5
762-1o2n_min-plants-chemplp	448981164608	340650889983	201023490413395	8	150	0	1.5
762-1o2n_min-plants-plp95	396190741669	409619621863	226783666737805	5	150	0	1.5
762-1o2n_min-plants-plp	109361205275	40156301067	36632587721436	6	150	0	1.5
762-1o2n_min-rdock-solv	107001173714	958327282805	101086215798865	0	150	0	1.5
762-1o2n_min-rdock-std	106391199917	920946529188	9978881525525	0	150	0	1.5
762-1o2n_min-vina-std	123117268691	426594339823	804924786277665	1	150	0	1.5
780-1o3d_min-autodock-ga	853354893113	420130313117	509675610720965	6	133	0	1.33
780-1o3d_min-autodock-lga	855796658792	454833551973	46106426029953	10	133	0	1.33
780-1o3d_min-autodock-ls	869103030946	311825632686	76199647658895	0	133	0	1.33
780-1o3d_min-glide-sp	140271143158	555304545993	100058779724272	1	133	0	1.33
780-1o3d_min-gold-asp	133524253542	244279600458	8175819290566	19	133	3	1.33
780-1o3d_min-gold-chemscore	10906482206	356451440171	466252163468865	9	133	0	1.33
780-1o3d_min-gold-goldscore	149755419441	67729949653	104797492424225	18	133	2	1.33
780-1o3d_min-gold-plp	298254870076	123502491667	18723188705685	1	133	0	1.33
780-1o3d_min-moe-AffinitydG	269697476406	320040606799	171334014377595	0	133	0	1.33
780-1o3d_min-moe-GBVIWSA	325525230801	845837020471	20596523771105	0	133	0	1.33
780-1o3d_min-moe-LondondG	247398383721	477874544206	173164488019035	0	133	0	1.33
780-1o3d_min-plants-chemplp	391917436234	323250479969	206899543301625	8	133	0	1.33
780-1o3d_min-plants-plp95	372117100784	336051028268	2213422733325	5	133	0	1.33
780-1o3d_min-plants-plp	378821549028	33787806558	19505831326668	6	133	0	1.33
780-1o3d_min-rdock-solv	105304667346	950320400838	10363879762259	0	133	0	1.33
780-1o3d_min-rdock-std	105550395861	102859075634	1047433387114	0	133	0	1.33
780-1o3d_min-vina-std	121741949861	620247595723	783553697895965	2	133	0	1.33
794-1no6_min-autodock-ga	675272443092	150084269662	462294184301	2	240	0	2.4
794-1no6_min-autodock-lga	704240676758	530471526097	345350126497565	10	240	0	2.4
794-1no6_min-autodock-ls	751909165791	43495327841	5548403443747	0	240	0	2.4
794-1no6_min-glide-sp	542275688067	916695574987	355194418260835	2	240	0	2.4
794-1no6_min-gold-asp	394420693732	649564663756	19431377450884	16	240	2	2.4
794-1no6_min-gold-chemscore	604501680613	54653125949	209310071871035	14	240	2	2.4
794-1no6_min-gold-goldscore	245898112136	603315732598	10830390998965	19	240	3	2.4
794-1no6_min-gold-plp	60383511456	682270754466	35901092000523	6	240	0	2.4
794-1no6_min-moe-AffinitydG	337579959293	373672661028	228794635463475	0	240	0	2.4
794-1no6_min-moe-GBVIWSA	337579959293	146113348165	26182405138055	0	240	0	2.4
794-1no6_min-moe-LondondG	280308184361	387585072984	155021291239635	0	240	0	2.4
794-1no6_min-plants-chemplp	565502247419	827409748794	36938938762457	6	240	0	2.4
794-1no6_min-plants-plp95	621775190254	988609299976	42351468056918	3	240	0	2.4
794-1no6_min-plants-plp	723992234536	362076165683	5034391220091	0	240	0	2.4
794-1no6_min-rdock-solv	754356231347	463301588407	63929462979375	0	240	0	2.4
794-1no6_min-rdock-std	711999005432	444993004161	600168833083	0	240	0	2.4
794-1no6_min-vina-std	612220269511	792929076274	39420829438692	3	240	0	2.4
801-1o33_min-autodock-ga	746155350693	157802708268	3341003296051	0	146	0	1.46
801-1o33_min-autodock-lga	215022009889	158539921919	16815689475095	0	146	0	1.46
801-1o33_min-autodock-ls	859863549151	645920503093	8066078757014	0	146	0	1.46
801-1o33_min-glide-sp	142961130358	573136502066	79523808921498	2	146	0	1.46
801-1o33_min-gold-asp	181843919786	779753185647	15185940382235	4	146	0	1.46
801-1o33_min-gold-chemscore	740808718098	158170361985	4504121486556	0	146	0	1.46
801-1o33_min-gold-goldscore	248007500746	174162137117	22786979971625	0	146	0	1.46
801-1o33_min-gold-plp ERR ERR ERR ERR 1.46 801-1o33_min-gold-plp ERR							0
801-1o33_min-moe-AffinitydG	234057817048	214927042701	11770305795094	0	146	0	1.46
801-1o33_min-moe-GBVIWSA	289311376511	214927042701	16897679669803	0	146	0	1.46
801-1o33_min-moe-LondondG	282794085548	214927042701	135949235612405	0	146	0	1.46
801-1o33_min-plants-chemplp	243332047395	814154610947	16393073090075	7	146	0	1.46
801-1o33_min-plants-plp95	396851959764	211451269738	19727018909424	4	146	0	1.46
801-1o33_min-plants-plp	111003037765	760720365665	24467184708609	5	146	0	1.46
801-1o33_min-rdock-solv	245392841411	109598854609	1920420428477	2	146	0	1.46
801-1o33_min-rdock-std	311582435464	171260490051	18935797078945	0	146	0	1.46
801-1o33_min-vina-std	116967027135	684237031875	620438426250425	1	146	0	1.46
802-1o35_min-autodock-ga	744822014981	103946111038	58592758362155	3	141	0	1.41
802-1o35_min-autodock-lga	726971528672	751896568685	144828763946655	17	141	1	1.41
802-1o35_min-autodock-ls	510816864444	345732306127	47178243704955	0	141	0	1.41
802-1o35_min-glide-sp	145919154866	107484929618	9115552752287	2	141	0	1.41
802-1o35_min-gold-asp	252399134329	771036491679	16905718172593	8	141	0	1.41
802-1o35_min-gold-chemscore	105888489297	833089289932	410875255804165	7	141	0	1.41
802-1o35_min-gold-goldscore	2434747299	759655297158	128594422655555	15	141	2	1.41
802-1o35_min-gold-plp	201705006457	74912908634	14225561252338	10	141	0	1.41
802-1o35_min-moe-AffinitydG	277545306626	180274580848	13770973712673	0	141	0	1.41
802-1o35_min-moe-GBVIWSA	295546944562	408612411706	137381358417935	0	141	0	1.41
802-1o35_min-moe-LondondG	287049747823	180274580848	148275639087625	0	141	0	1.41
802-1o35_min-plants-chemplp	109459621729	4733173502	21854980878258	5	141	0	1.41
802-1o35_min-plants-plp95	463745278477	705568740804	20684350499917	3	141	0	1.41
802-1o35_min-plants-plp	114163948052	740722435532	46708870950677	2	141	0	1.41
802-1o35_min-rdock-solv	738042972997	503363425345	6760678496372	0	141	0	1.41
802-1o35_min-rdock-std	731805621938	212529498317	5897049698487	0	141	0	1.41
802-1o35_min-vina-std	118211571726	560107177244	73680906815372	1	141	0	1.41
806-1qb9_min-autodock-ga	959117001571	63784257674	7672636596378	0	180	0	1.8
806-1qb9_min-autodock-lga	978025408944	726677830582	8266079679592	0	180	0	1.8
806-1qb9_min-autodock-ls	898306543568	269862535076	70075049479505	0	180	0	1.8
806-1qb9_min-glide-sp	774267107202	156741695715	6087502957155	1	180	0	1.8
806-1qb9_min-gold-asp	873387814045	121760962745	41217122710475	1	180	0	1.8
806-1qb9_min-gold-chemscore	799329841005	847852596189	43319008459228	3	180	0	1.8
806-1qb9_min-gold-goldscore	100785947483	115806151449	61728899619515	1	180	0	1.8
806-1qb9_min-gold-plp	969815024911	104579095038	558709313324	2	180	0	1.8
806-1qb9_min-moe-AffinitydG	301475505764	780818630877	180608674118265	0	180	0	1.8
806-1qb9_min-moe-GBVIWSA	359270840197	734352239475	178475328980105	0	180	0	1.8
806-1qb9_min-moe-LondondG	36117727666	717578038698	2339586943336	0	180	0	1.8
806-1qb9_min-plants-chemplp	944771800564	873846381453	562581286728465	6	180	0	1.8
806-1qb9_min-plants-plp95	10141541459	320545351465	82040140488235	0	180	0	1.8
806-1qb9_min-plants-plp	104490639501	307371236293	7697943565371	0	180	0	1.8
806-1qb9_min-rdock-solv	101749157235	643448938834	89210764087955	0	180	0	1.8
806-1qb9_min-rdock-std	10392050985	695102528307	84874305086545	0	180	0	1.8
806-1qb9_min-vina-std	104590074848	357077777507	73402946073835	0	180	0	1.8
815-1f0r_min-autodock-ga ERR ERR ERR ERR 1.80 815-1f0r_min-autodock-ga ERR							0
815-1f0r_min-autodock-lga ERR ERR ERR ERR 1.80 815-1f0r_min-autodock-lga ERR							0
815-1f0r_min-autodock-ls ERR ERR ERR ERR 1.80 815-1f0r_min-autodock-ls ERR							0
815-1f0r_min-glide-sp	116458292658	143839389677	71454970756155	4	210	0	2.1
815-1f0r_min-gold-asp	900257654237	663350179988	634885368795515	5	210	0	2.1
815-1f0r_min-gold-chemscore	957533283848	803370266139	721507240212775	4	210	0	2.1
815-1f0r_min-gold-goldscore	801329526038	229413125099	2834129160865	0	210	0	2.1
815-1f0r_min-gold-plp	896678672955	764510852262	28009610272245	14	210	1	2.1
815-1f0r_min-moe-AffinitydG	376963509691	715598693178	236434279675835	0	210	0	2.1
815-1f0r_min-moe-GBVIWSA	388061410355	715598693178	23036161383447	0	210	0	2.1
815-1f0r_min-moe-LondondG	306758643015	409688378035	207669061688685	0	210	0	2.1
815-1f0r_min-plants-chemplp	971058864366	110605695283	4340626645989	7	210	0	2.1
815-1f0r_min-plants-plp95	993793874776	152863363182	5385759913485	2	210	0	2.1
815-1f0r_min-plants-plp	971983200897	200079817516	6013545117129	2	210	0	2.1
815-1f0r_min-rdock-solv	100245516243	664273767018	85507755797755	0	210	0	2.1
815-1f0r_min-rdock-std	998420421295	664012656295	8470101643026	0	210	0	2.1
[truncated: 68,663 more rows]
